1  
2  
3  
4  
5  
6  
7  
8  
9  
10  
11  
12  
13  
14  
15  
16  
17  
18  
19  
20  
21  
22  
23  
24  
25  
26

## DNA replication-mediated error correction of ectopic CENP-A deposition maintains centromere identity

Yael Nechemia-Arbely<sup>1\*</sup>, Karen H. Miga<sup>2\*</sup>, Ofer Shoshani<sup>1</sup>, Aaron Aslanian<sup>3</sup>,  
Maira A. McMahon<sup>1</sup>, Ah Young Lee<sup>1</sup>, Daniele Fachinetti<sup>1, 4</sup>, John R. Yates III<sup>3</sup>, Bing Ren<sup>1</sup>, and  
Don W. Cleveland<sup>1#</sup>

\* These authors contributed equally

<sup>1</sup>Ludwig Institute for Cancer Research and Department of Cellular and Molecular Medicine,  
University of California at San Diego, La Jolla, CA 92093 USA

<sup>2</sup>Center for Biomolecular Science & Engineering, University of California Santa Cruz, Santa  
Cruz, California 95064, USA

<sup>3</sup>Department of Chemical Physiology, The Scripps Research Institute, La Jolla, California  
92037, USA

<sup>4</sup>Present address: Institut Curie, PSL Research University, CNRS, UMR 144, 26 rue d'Ulm, F-  
75005, Paris, France

#Corresponding author

27 **Abstract 1 (100 words)**

28 Chromatin assembled with the histone H3 variant CENP-A is the heritable epigenetic  
29 determinant of human centromere identity. Using genome-wide mapping and reference models  
30 for 23 human centromeres, CENP-A is shown in early G1 to be assembled into nucleosomes  
31 within megabase, repetitive  $\alpha$ -satellite DNAs at each centromere and onto 11,390  
32 transcriptionally active sites on the chromosome arms. Here we identify that DNA replication  
33 acts as an error correction mechanism to sustain centromere identity through the removal of  
34 the sites of CENP-A loading on the chromosome arms, while maintaining centromere-bound  
35 CENP-A with the same DNA sequence preferences as in its initial loading.

36

37

## 38 Introduction

39 Correct chromosome segregation during mitosis is crucial to ensure each daughter cell will  
40 receive a complete set of chromosomes. This process relies on a unique chromatin domain  
41 known as the centromere. Human centromeres are located on megabase long <sup>1</sup> chromosomal  
42 regions and are comprised of tandemly repeated arrays of a ~171 bp element, termed  $\alpha$ -satellite  
43 DNA <sup>2-4</sup>. CENP-A is a histone H3 variant <sup>5,6</sup> that replaces histone H3 in ~3% of  $\alpha$ -satellite DNA  
44 repeats <sup>7,8</sup>, is flanked by pericentric heterochromatin containing H3K9me2/3 <sup>9</sup>, and apparently  
45 spans on 1/3<sup>rd</sup> to one half of  $\alpha$ -satellite arrays in the centromeres of chromosomes X and Y <sup>10</sup>.  
46 Despite the correlation between centromere location and the presence of  $\alpha$ -satellite DNA  
47 repeats,  $\alpha$ -satellite DNA sequences are neither sufficient nor essential for centromere identity  
48 <sup>2,11,12</sup>. This has been demonstrated by several measures including identification of multiple  
49 examples <sup>13</sup> of acquisition of a new centromere (referred to as a neocentromere) at a new  
50 location coupled with inactivation of the original centromere on the same chromosome. Indeed,  
51 while  $\alpha$ -satellite arrays incorporated into human artificial chromosomes (HACs) can nucleate  
52 active centromeres <sup>14-21</sup>, they do so at low (5-8%) efficiencies.

53 All of this has led to a consensus view that mammalian centromeres are defined by an  
54 epigenetic mark <sup>2</sup>. Use of gene replacement in human cells and fission yeast has identified the  
55 mark to be CENP-A-containing chromatin <sup>22</sup>, which maintains and propagates centromere  
56 function indefinitely by recruiting CENP-C and the constitutive centromere associated complex  
57 (CCAN) <sup>23-26</sup>. We <sup>8</sup> and others <sup>27</sup> have shown that the overwhelming majority of human CENP-  
58 A chromatin particles contain two molecules of CENP-A at all cell cycle points, with CENP-A  
59 chromatin bound at authentic centromeres protecting 133 bp of centromeric  $\alpha$ -satellite-  
60 containing DNA from nuclease digestion <sup>8,28</sup> before and after DNA replication <sup>8</sup>. This evidence

61 is consistent with an octameric nucleosome with DNA unwinding at all cell cycle points, and  
62 with no evidence for oscillation between hemisomes and octasomes, and with heterotypic  
63 CENP-A/histone H3-containing nucleosomes comprising at most 2% of CENP-A-containing  
64 chromatin <sup>8</sup>.

65 During DNA replication, initially bound CENP-A is quantitatively redistributed to each daughter  
66 centromere <sup>29</sup>, while incorporation of new molecules of CENP-A into chromatin occurs only for  
67 a short period after exit from mitosis <sup>29-32</sup> when its loading chaperone HJURP <sup>33,34</sup> is active <sup>35</sup>.  
68 This temporal separation of new CENP-A chromatin assembly at mitotic exit from centromeric  
69 DNA replication raises the important question of how is the epigenetic mark that determines  
70 centromere identity maintained across the cell cycle when it is expected to be dislodged by DNA  
71 replication and diluted at each centromere as no new CENP-A is assembled until the next G1  
72 <sup>29</sup>. Moreover, endogenous CENP-A comprises only ~0.1% of the total histone H3 variants.  
73 Recognizing that a proportion of CENP-A is assembled at the centromeres with the remainder  
74 loaded onto sites on the chromosome arms <sup>7,8,36</sup>, long-term maintenance of centromere identity  
75 and function requires limiting accumulation of non-centromeric CENP-A. Indeed, artificially  
76 increasing CENP-A expression by several fold in human cells <sup>36-39</sup> or flies <sup>40</sup> or the CENP-A  
77 homolog (Cse4) in yeast <sup>41,42</sup> increases ectopic deposition at non-centromeric sites,  
78 accompanied by chromosome segregation aberrations.

79 Using centromere reference models for each of the centromeres of the 22 human autosomes  
80 and the X chromosome, we show that after DNA replication centromere-bound CENP-A is  
81 reassembled into nucleosomes onto  $\alpha$ -satellite DNA sequences with sequence preferences that  
82 are indistinguishable from those bound in its initial HJURP-dependent loading at mitotic exit and  
83 that this re-loading is independent of CENP-A expression level. Furthermore, we identify that a



84 DNA synthesis-mediated error correction mechanism acts in S phase to remove ectopically  
85 loaded CENP-A found within transcriptionally active chromatin outside of the centromeres while  
86 retaining centromere-bound CENP-A, resulting in maintenance of epigenetically defined  
87 centromere identity.

## 88 **Results**

### 89 **CENP-A binding at 23 human centromere reference models**

90 To identify the sequences bound by CENP-A across each human centromere, chromatin was  
91 isolated from synchronized HeLa cells expressing either i) CENP-A<sup>LAP</sup>, a CENP-A variant  
92 carboxy-terminally fused to a localization [EYFP] and affinity [His] purification tag<sup>43</sup> at one  
93 endogenous CENP-A allele (Fig. S1a, Fig. 1a) or ii) stably expressing an elevated level (4.5  
94 times the level of CENP-A in parental cells) of CENP-A<sup>TAP</sup>, a CENP-A fusion with carboxy-  
95 terminal tandem affinity purification (S protein and protein A) tags separated by a TEV protease  
96 cleavage site (Fig. S1b, Fig. 1a). Centromeric localization of both CENP-A variants was  
97 confirmed using immunofluorescence (Fig. S1c, d), each of which has previously been shown  
98 to support long-term centromere identity and mediate high fidelity chromosome segregation in  
99 the absence of wild type CENP-A<sup>7,8</sup>.

100 Chromatin was isolated from cells synchronized to be in G1 or G2 (Fig. 1a). Synchronization  
101 efficiency was >80% as determined by fluorescent activated cell sorting (FACS) analysis of  
102 DNA content (Fig. S1e). In parallel, chromatin was also isolated from randomly cycling cells  
103 stably expressing TAP tagged histone H3.1 (H3.1<sup>TAP</sup> – Fig. S1b, Fig. 1a)<sup>23</sup>. Chromatin from  
104 each line at G1 and G2 cell cycle phases was digested with micrococcal nuclease to generate  
105 mono-nucleosomes, producing the expected 147 bp of protected DNA length for bulk  
106 nucleosomes assembled with histone H3 (Fig. 1a, c - upper panel). CENP-A<sup>LAP</sup>, CENP-A<sup>TAP</sup> or

107 H3.1<sup>TAP</sup> containing complexes were then affinity purified from the mono-nucleosome-containing  
108 pool using anti-GFP or rabbit-IgG antibodies coupled to magnetic beads. PreScission or TEV  
109 protease cleavage was then used to elute His or S-protein tagged CENP-A or S-tagged H3.1  
110 chromatin under mild conditions that maintain initially assembled chromatin (Fig. 1a).  $\alpha$ -satellite  
111 DNA sequences were enriched 30-35 fold in DNA isolated from CENP-A<sup>TAP</sup> or CENP-A<sup>+LAP</sup>  
112 cells (Fig. 1b), the expected enrichment since  $\alpha$ -satellite DNA comprises ~3% of the genome  
113 <sup>8,21</sup>. While micro-capillary electrophoresis of bulk input chromatin produced the expected 147  
114 bp of protected DNA length for nucleosomes assembled with histone H3 (Fig. 1c - upper panel),  
115 isolated CENP-A<sup>LAP</sup> chromatin expressed at endogenous CENP-A levels produced DNA  
116 lengths centered on 133 bp, both before and after DNA replication (Fig. 1c, lower panel), a  
117 distribution indistinguishable from that previously reported for octameric CENP-A-containing  
118 nucleosomes assembled in vitro and in which DNA unwinding at entry and exit has been  
119 demonstrated <sup>8,44</sup>.

120 Libraries of affinity purified CENP-A<sup>LAP</sup>, CENP-A<sup>TAP</sup>, and H3.1<sup>TAP</sup>-bound DNAs were prepared,  
121 sequenced (using paired-end 100 bp sequencing), and mapped (Fig. 1a, d and Table S1) onto  
122 the published reference model for the centromere of the X chromosome <sup>45</sup> and unpublished  
123 reference models for the centromeres of the 22 human autosomes <sup>46,47</sup>. These centromere  
124 models include the observed variation in  $\alpha$ -satellite Higher Order Repeat (HOR) array  
125 sequences contained in the HuRef genome <sup>48</sup>. The highly repeated sequences preclude  
126 distinguishing between centromeric and pericentromeric sequences and the order of repeats in  
127 the models is arbitrarily assigned and portions of the centromeres of the acrocentric  
128 chromosomes 13, 14, 21 and 22, as well as portions of centromeres of chromosomes 1, 5 and  
129 19, contain nearly identical arrays that cannot be distinguished.

130 Sequences in each reference centromere associated with CENP-A binding were identified (Fig.  
131 1d,e; Fig. S2) using algorithm-based scripts [SICER and MACS <sup>49,50</sup>]. Mapping of CENP-A<sup>LAP</sup>  
132 expressed at endogenous levels across the centromeric regions of all 23 reference centromeres  
133 (see Fig. 1e for chromosome 18 and Figure S2 for the other 22) revealed the profile of CENP-  
134 A binding. Mapping to the sequences in the reference centromeres was highly reproducible  
135 (e.g., compare duplicates in Figs. 1e) and largely unaffected by increasing CENP-A levels by  
136 4.5-fold (e.g., compare sequences bound in CENP-A<sup>TAP</sup> cells with those in CENP-A<sup>+LAP</sup> cells in  
137 Figs. 1e and 2a, b).

138 Analysis of CENP-A-bound DNAs aligned to  $\alpha$ -satellite sequences in CENP-A<sup>+LAP</sup> G1 cells  
139 revealed that our CENP-A ChIP-seq approach resulted in varying levels of array enrichment,  
140 from ~10.5-fold enrichment for array D3Z1 in cen3 to ~213-fold for array GJ211930.1 in cen10,  
141 with most active arrays showing enrichment level of 20-40-fold above background (input) level  
142 (Table S2; columns 13, 14). For the 6 of the 17 centromeres which contain more than one  $\alpha$ -  
143 satellite array within them, CENP-A was enriched only in one, indicating that only one array was  
144 active (see centromere reference models 3, 7, 12, 15, 16 and 19; Table S2: columns 13, 14).  
145 Multiple  $\alpha$ -satellite arrays in 11 centromeres (for example, see centromere reference models  
146 10,11,13, 14, and 17; Table S2: columns 13, 14) showed enrichment of CENP-A binding in two  
147 or more arrays. These may represent functional epialleles for CENP-A binding, (i.e., in which  
148 CENP-A binds to a different array in each homologue), as was shown previously for cen17 in  
149 two diploid cell human lines <sup>20</sup>. Increased levels of CENP-A expression (in CENP-A<sup>TAP</sup> versus  
150 CENP-A<sup>+LAP</sup> cells) did not increase the number of binding peaks in the reference centromeres  
151 (Fig. 1d, e), but did increase occupancy within the cell population at some divergent  
152 monomeric  $\alpha$ -satellite repeats (Fig. S1f) or within HORs (Fig. S1g), with both examples

153 occurring in regions with few 17 bp CENP-B boxes (Fig. S1f, g – compare sites bound at  
154 endogenous or increased CENP-A levels) that are direct binding sites for CENP-B<sup>51</sup>, the only  
155 known sequence-specific human centromere binding protein.

### 156 **CENP-A nucleosomes are retained at centromeric loading sites after DNA replication**

157 Next, we examined how centromeric CENP-A binding was affected by DNA replication. Despite  
158 the known redistribution of initially centromere-bound CENP-A onto each of the new daughter  
159 centromeres without addition of new CENP-A<sup>29</sup>, comparison of the sequences bound by CENP-  
160 A in G1 with those bound in G2 revealed the remarkable feature that for all 23 centromeres, at  
161 both normal (CENP-A<sup>+LAP</sup>) and elevated (CENP-A<sup>TAP</sup>) levels, CENP-A was bound to  
162 indistinguishable  $\alpha$ -satellite sequences before and after DNA replication (shown for the  
163 reference centromere of chromosome 18 in Fig. 1e and for the other chromosomes in Fig. S2).  
164 Indeed, most (87%) of  $\alpha$ -satellite sequences with CENP-A binding peaks in chromatin  
165 immunopurified from G1 CENP-A<sup>TAP</sup> cells remained at G2 (Fig. S1h, top). Similarly high overlap  
166 (89%) was identified between repeats (called by SICER<sup>50</sup>) bound by CENP-A in G1 or G2 when  
167 CENP-A was expressed at endogenous levels (in CENP-A<sup>+LAP</sup> cells) (Fig. S1h, bottom).

168 To address whether CENP-A was precisely retained at the same centromeric  $\alpha$ -satellite loading  
169 sites after DNA replication, we filtered out multi-mapping reads, leaving only reads that map to  
170 sites that are single copy in the HuRef genome, and therefore are mapped uniquely. Analysis  
171 of these single copy variants revealed that CENP-A was quantitatively retained after DNA  
172 replication at single copy sites found within HORs (Fig. 2a-f). Indeed, almost all (93 of 96) unique  
173 CENP-A binding sites mapped within the 23 centromeres of CENP-A<sup>TAP</sup> cells in G1 remained  
174 undiminished at G2 (Fig. 2g, left), with the remaining 3 peaks only slightly diminished.

### 175 **Sites of CENP-A assembly onto chromosome arms in early G1 are removed by G2**

176 Genome-wide mapping of CENP-A-bound DNAs revealed that, in addition to the striking  
177 enrichment at centromeric  $\alpha$ -satellites, CENP-A was preferentially and highly reproducibly  
178 incorporated into unique sequence, non- $\alpha$ -satellite sites on the arms of all 23 chromosomes  
179 (Figs. 3a, b and 4). Sites enriched for CENP-A binding were essentially identical in DNAs from  
180 randomly cycling cells or G1 cells (Fig. 3a, b, mapped sequence reads in color and binding sites  
181 underneath in black). A 4.5-fold increase in CENP-A levels in CENP-A<sup>TAP</sup> cells drove  
182 correspondingly increased CENP-A sites of incorporation on the arms (from 11,390 sites at  
183 normal CENP-A levels to 40,279 sites when CENP-A was elevated 4.5-fold - Fig. 3a-b, d), but  
184 did not increase the binding peaks within the centromeric HORs (Fig. 1d) or the number of  
185 unique single copy sites within centromeric HORs (Fig. 2g, right).

186 Remarkably, for all 23 human chromosomes and for CENP-A accumulated to endogenous  
187 (CENP-A<sup>LAP</sup>) or increased (CENP-A<sup>TAP</sup>) expression levels, passage from G1 to G2 almost  
188 eliminated enrichment of CENP-A binding to specific sites on the chromosome arms, while  
189 leaving  $\alpha$ -satellite bound sequences unaffected (Figs. 1d, 3, 4). Loss by G2 of CENP-A binding  
190 in G1 at specific arm sites was highly reproducible, as demonstrated by experimental replicas  
191 (Fig. 3b). On a genome-wide scale, scoring peak binding sites with thresholds of  $\geq$  5-fold, 10-  
192 fold or 100-fold of CENP-A binding over background, at least 90% of sites bound on  
193 chromosome arms in G1 in CENP-A<sup>TAP</sup> cells were removed by early G2 (Fig. 3e) and all of  
194 those still identified in G2 were substantially reduced in peak height.

195 Taken together, whether at endogenous or increased CENP-A expression level, CENP-A is  
196 loaded in G1 not only at centromeric  $\alpha$ -satellite DNAs but also at preferential sites on the  
197 chromosome arms, but passage across S phase removes or sharply diminishes these unique  
198 sequence sites of enhanced CENP-A binding on the arms, while CENP-A binding to

199 centromeric sequences is retained.

200 **CENP-A loading sites on chromosome arms are not seeding hotspots for neocentromere**  
201 **formation**

202 We next determined whether sites of preferential CENP-A loading onto the chromosome arms  
203 corresponded to sites that have become active “neocentromere” locations<sup>52</sup> for the three  
204 human neocentromeres for which prior work has defined their chromosomal locations<sup>28</sup>. The  
205 first of these, named PDNC4, has a neocentromere on chromosome 4<sup>53</sup> that spans 300 kb  
206 (from 88.2 to 88.5 Mb). No peak binding sites of CENP-A relative to neighboring regions were  
207 found in this chromosomal region even with elevated CENP-A expression in CENP-A<sup>TAP</sup> cells  
208 (Fig. 5a). Similar examination of two additional neocentromere-containing locations/positions  
209 [line MS4221 that harbors a 400 kb neocentromere at position 86.5 to 86.9 Mb on chromosome  
210 8<sup>28,54</sup> and line IMS13q with a neocentromere on chromosome 13<sup>55</sup> that spans 100 kb (from  
211 97.7 to 97.8 Mb)] again revealed no elevated incorporation of CENP-A<sup>TAP</sup> within the DNA  
212 sequences corresponding to the neocentromere domains (Fig. S3a, b).

213 **CENP-A is ectopically loaded at early G1 into open and active chromatin**

214 We examined the nature of the sites on the chromosome arms into which CENP-A was  
215 assembled in G1. A 2-fold enrichment (compared to levels expected by chance) of CENP-A<sup>TAP</sup>  
216 bound to unique arms sites during G1 was found at promoters, enhancers or promoters of  
217 expressed genes and a 2.5-fold enrichment at sites bound by the transcriptional repressor  
218 CTCF (Fig. S3d), a similar trend to what has been observed previously for increased expression  
219 of CENP-A<sup>36</sup>. Importantly, more than 80% of CENP-A<sup>TAP</sup> binding sites on chromosome arms  
220 with peak heights  $\geq$  5-fold over background overlapped with DNase I hypersensitive sites  
221 identified by comparison with ENCODE DNase I hypersensitive datasets (with minimum overlap

222 of 100 bases) that denote accessible chromatin zones and which are functionally related to  
223 transcriptional activity (Fig. 5b, c). A ~5.5-fold enrichment of CENP-A<sup>TAP</sup> was found at these  
224 sites (Fig. 5d). CENP-A assembled into chromatin when expressed at endogenous levels was  
225 also found to be enriched 3-fold at DNase I hypersensitive sites (Fig. 5e) and promoters (Fig.  
226 S3f). Conversely, both CENP-A<sup>TAP</sup> and CENP-A<sup>LAP</sup> were not enriched at H3k27me3 peak sites  
227 that are tightly associated with inactive gene promoters (Fig. S3c, e).

228 **Ectopic CENP-A is removed contemporaneously with replication fork progression, while**  
229 **centromeric CENP-A is retained**

230  
231 We next tested whether removal by G2 of CENP-A assembled into nucleosomes at unique sites  
232 on the chromosome arms is mediated by the direct action of the DNA replication machinery.  
233 CENP-A<sup>TAP</sup> was affinity purified from mid S phase cells and CENP-A-bound DNAs were  
234 sequenced (Fig. 6a; Fig. S4a). In parallel, we pulse-labeled newly synthesized DNA in our  
235 synchronized cells by addition of bromodeoxyuridine (BrdU) for 1 hour at early (S0-S1), mid  
236 (S3-S4), and late S phase (S6-S7) (Fig. 6a; Fig. S4a). Genomic DNA from each time point was  
237 sonicated (Fig. S4b) and immunoprecipitated with a BrdU antibody (Fig. 6a). Eluted DNA was  
238 then sequenced and mapped to the genome [an approach known as Repli-seq<sup>56</sup>], yielding  
239 regions of early, mid, and late replicating chromatin (an example from a region of chromosome  
240 20 arm is shown in Fig. 6b). The early replication timing was validated (using qPCR - Fig. S4c)  
241 for two genes (MRGPRES and MMP15) previously reported to be early replicating [ref<sup>57</sup> and  
242 ENCODE Repli-seq]. Similarly, a gene and a centromeric region (HBE1 and Sat2) previously  
243 reported to be late replicating [ref<sup>58</sup> and ENCODE Repli-seq] were confirmed in our cells to be  
244 replicated late (Fig. S4d).

245 CENP-A immunoprecipitation from micrococcal nuclease digested chromatin isolated from



246 early and mid S phase cells resulted in levels of  $\alpha$ -satellite DNA enrichment (Fig. S4e) similar  
247 to those achieved at G1 phase (Fig. 1b). Furthermore, nucleosomal CENP-A chromatin  
248 produced by micrococcal nuclease digestion protected 133 bp of DNA at early and mid S phase  
249 (Fig. S4f) just as it did in G1 and G2 [Fig. 1c; see also ref <sup>8</sup>], with no evidence for a structural  
250 change from hemisomes to nucleosomes and back to hemisomes during S phase as previously  
251 claimed <sup>59</sup>. Mapping of CENP-A binding sites within the chromosome arms, combined with  
252 Repli-seq analysis, revealed that 91% of ectopic G1 CENP-A binding sites were found in early-  
253 or mid-S replicating regions (Fig. 6b, c). While centromeres of chromosomes 1, 3, 10, 17, 18  
254 and X <sup>60</sup> and bulk  $\alpha$ -satellite DNAs or a consensus pool of alphoid DNA sequences have been  
255 reported to replicate at mid <sup>61,62</sup> or mid-to-late <sup>63</sup> S phase, in our cells  $\alpha$ -satellite containing  
256 DNAs in all 23 centromeres were found almost exclusively to be late replicating (Fig. 6d).

257 Remarkably, throughout S phase, centromere bound CENP-A found in G1 was completely  
258 retained across each reference centromere with the same sequence binding preferences  
259 (shown for centromere 18 in Fig. 6e and Fig. S4g). Retention of CENP-A binding during DNA  
260 replication was observed also at the unique sequence binding sites within HORs (Fig. 6f).  
261 Indeed, all 96 CENP-A<sup>TAP</sup> G1 peaks at single copy variants within  $\alpha$ -satellite HORs remained  
262 bound by CENP-A at mid S phase (Fig. 6g). In contrast, early replicating ectopic CENP-A  
263 binding sites were nearly quantitatively removed during or quickly after their replication and  
264 were no longer visible at mid-S phase (Fig. 6h, i). Similarly, ectopic CENP-A binding sites that  
265 were in mid-S replicating regions remained at mid-S but were removed quickly after that and  
266 were absent by late S/G2 (Fig. 6j, k). Ten percent of ectopic CENP-A G1 peaks were in late-S  
267 replicating regions (Fig. 6c). Here again, almost all (85%) of these were removed by G2 (Fig.  
268 6l, m), while late replicating centromeric CENP-A peaks were retained (Fig 6d-g). These results



269 demonstrate that ectopic, but not centromeric, CENP-A binding sites are removed as DNA  
270 replication progresses. Moreover, that contemporaneously late replicating centromeric bound  
271 CENP-As, including the unique binding sites within the 23 centromeres, were retained following  
272 DNA replication while ectopic sites were removed eliminates the possibility that retention could  
273 be a consequence of a general alteration in late S phase in the activity of one or more DNA  
274 replication components that could potentially act to facilitate CENP-A reloading.

275 **Centromeric CENP-A is continuously bound by the CCAN complex during centromeric**  
276 **DNA replication**

277 To comprehensively determine the components which associate with CENP-A during  
278 replication in late S, we used mass spectrometry following affinity purification of CENP-A  
279 nucleosomes (Fig. S4h, left panel). A structural link that normally bridges multiple centromeric  
280 CENP-A nucleosomes and nucleates full kinetochore assembly before mitotic entry<sup>64-70</sup> is the  
281 16-subunit constitutive centromere associated network (CCAN). This complex is anchored to  
282 CENP-A primarily through CENP-C<sup>68,71-75</sup> and sustained by CENP-B binding to  $\alpha$ -satellites<sup>76</sup>.

283 Remarkably, mass spectrometry identified that all 16 CCAN components<sup>23,25</sup> remained  
284 associated with mono-nucleosomal CENP-A chromatin affinity purified from late S/G2 (Fig.6n;  
285 Fig. S4h). Further, association of CENP-A with MCM2 (and other components of the MCM2-7  
286 replicative helicase complex) and CAF1p150 was enhanced at late S phase (compared with its  
287 association in randomly cycling cells) (Fig. S4i). Stable association with CENP-A was also seen  
288 for HJURP, multiple chromatin remodeling factors and nuclear chaperones (Fig. S4k), histones  
289 (Fig. S4l), centromere and kinetochore components (Fig. S4m), and other DNA replication  
290 proteins (Fig. S4j).

291 The continuing interaction during DNA replication of CCAN proteins with CENP-A and which is  
292 maintained even on mono-nucleosomes provides strong experimental support that the CCAN  
293 network tethers CCAN-bound centromeric CENP-A at or near the centromeric DNA replication  
294 forks, thereby enabling its efficient reincorporation after replication fork passage. To test this  
295 further, the composition of CENP-A-containing nucleosomal complexes from G1 to late S/G2  
296 was determined following affinity purification (via the TAP tag) of chromatin-bound CENP-A<sup>TAP</sup>  
297 from predominantly mononucleosome pool (Fig. S4h, right panel).

298 We initially focused on the Chromatin Assembly Factor 1 (CAF1) complex, which is required for  
299 *de novo* chromatin assembly following DNA replication <sup>77,78</sup>. Its p48 subunit (also known as  
300 CAF1 subunit c, RbAp48, or RBBP4) 1) binds histone H4 <sup>79</sup> and 2) has been reported as a  
301 binding partner in a CENP-A pre-nucleosomal complex with HJURP and nucleophosmin  
302 (NPM1) <sup>34</sup>. In this latter complex it has been proposed to promote H4K5 and K12 acetylation  
303 prior to CENP-A loading <sup>80</sup> and maintain the deacetylated state of histones in the central core  
304 of centromeres after deposition <sup>81</sup>. Immunoblotting revealed that CAF1 p48 co-immunopurified  
305 with CENP-A from G1 through late S/G2 (Fig. 6o), consistent with a role for it in binding H4 and  
306 perhaps maintaining a deacetylated state.

307 In striking contrast, the two other CAF1 subunits, CAF1 p150 and CAF1 p60, that are essential  
308 for *de novo* chromatin assembly *in vitro* <sup>82</sup>, remained much more strongly associated with  
309 CENP-A nucleosomes in late S/G2 than in mid-S (Fig. 6o). Additionally, MCM2, a core subunit  
310 of the DNA replicative helicase MCM2-7 complex that has an important role in recycling of old  
311 histones as the replication fork advances <sup>83</sup>, was robustly co-purified with CENP-A only in late  
312 S phase derived chromatin, with no association detected in mid-S (Fig. 6o), when ectopic  
313 CENP-A peaks replicate. Thus, there is stable association of CENP-A with MCM2 and the CAF1

314 subunits necessary for chromatin reassembly after replication only in late S phase, the time  
315 when all centromeric, but only a small minority of ectopically loaded, CENP-A is replicated.

## 316 **Discussion**

317 Using reference models for 23 human centromeres, we have identified that during DNA  
318 replication CENP-A nucleosomes initially assembled onto centromeric  $\alpha$ -satellite repeats are  
319 reassembled onto the same spectrum of  $\alpha$ -satellite repeat sequences of each daughter  
320 centromere as was bound prior to DNA replication. Additionally, genome-wide mapping of sites  
321 of CENP-A assembly identified that when CENP-A is expressed at endogenous levels, the  
322 selectivity of the histone chaperone HJURP's loading in early G1 of new CENP-A at or near  
323 existing sites of centromeric CENP-A-containing chromatin is insufficient to prevent its loading  
324 onto >11,000 sites along the chromosome arms (Fig. 3d). We also show that the number of  
325 ectopic sites increases as CENP-A expression levels increase, as has been reported in multiple  
326 human cancers<sup>39,63,64</sup>. These sites of ectopic CENP-A are replicated in early and mid-S (Fig.  
327 6b, c) and are nearly quantitatively removed as DNA replication progresses (Fig. 6h-m).

328 Taken together, our evidence identifies that DNA replication functions not only to duplicate  
329 centromeric DNA but also as an error correction mechanism to maintain epigenetically-defined  
330 centromere position and identity by coupling centromeric CENP-A retention with its removal  
331 from assembly sites on the chromosome arms (Fig. 6p). Indeed, our data reveal that CENP-A  
332 loaded onto unique sites (after filtering out multi-mapping reads in the  $\alpha$ -satellite HORs in the  
333 HuRef genome) within the 23 reference centromeres, is precisely maintained at these sites  
334 during and after DNA replication, offering direct support that at least for each of these unique  
335 sites the replication machine re-loads CENP-A back onto the exact same centromeric DNA site  
336 (Fig. 2, 6f,g). Accompanying this is retention of centromeric,  $\alpha$ -satellite DNA-bound CENP-A

337 before and after DNA replication at indistinguishable sequences throughout reference models  
338 of all 23 human centromeres (Fig. S2). DNA replication produces a very different situation for  
339 CENP-A initially assembled into nucleosomes on the chromosome arms. Sites of this  
340 ectopically loaded CENP-A are nearly quantitatively stripped during DNA replication (Figs. 3, 4,  
341 6h-m), providing strong evidence that DNA replication acts not only to duplicate both  
342 centromeric and non-centromeric DNA sequences, but also to reinforce epigenetically defined  
343 centromere position and identity, while precluding acquisition of CENP-A-dependent  
344 centromere function at non-centromeric sites (Fig. 6p).

345 Without such correction, ectopically loaded sites would be maintained and potentially reinforced  
346 cell cycle after cell cycle, ultimately recruiting CENP-C which in turn can nucleate assembly of  
347 the CCAN complex<sup>23-26</sup>. Increasing levels of arm-associated CENP-A/CCAN would present a  
348 major problem for faithful assembly and function of a single centromere/kinetochore per  
349 chromosome, both by acquisition of partial centromere function and by competition with the  
350 authentic centromeres for the pool of available CCAN components. Indeed, high levels of  
351 CENP-A overexpression 1) leads to recruitment of detectable levels of 3 of 16 CCAN  
352 components (CENP-C, CENP-N and Mis18) assembled onto the arms<sup>36,37,84</sup>, 2) ongoing  
353 chromosome segregation errors<sup>38</sup>, and 3) has been observed in several cancers where it has  
354 been associated with increased invasiveness and poor prognosis<sup>39,85,86</sup>.

355 As to the mechanism for retention during DNA replication of centromeric but not ectopically  
356 loaded CENP-A, an attractive model strongly supported by our evidence is that the local  
357 reassembly of CENP-A within centromeric domains is mediated by the continuing centromeric  
358 CENP-A association with CCAN complexes, which we show to be maintained on individual  
359 CENP-A nucleosomes in late S when centromeres are replicated (Fig. 6n). The continued

360 presence of the assembled CCAN network directly bound to CENP-A during centromere DNA  
361 replication offers a plausible explanation for centromeric CENP-A retention (together with the  
362 MCM2 replicative helicase and the major CAF1 subunits required for nucleosome reassembly  
363 post-replication<sup>77,83</sup>). In such a model, centromere identity is preserved by an assembled CCAN  
364 network which serves during DNA replication to tether disassembled CENP-A/H4 dimers or  
365 tetramers near the sites of centromere replication, thereby enabling their local reassembly onto  
366 each of the daughter centromeres and the corresponding epigenetic inheritance of centromere  
367 identity.

## 368 **Figure Legends**

369 **Figure 1. CENP-A ChIP-seq identifies CENP-A binding at reference centromeres of 23**  
370 **human chromosomes.** (a) CENP-A ChIP-sequencing experimental design. (b) Quantitative  
371 real-time PCR for  $\alpha$ -satellite DNA in chromosomes 1, 3, 5, 10, 12 and 16. N=2 for CENP-A<sup>TAP</sup>  
372 and 3 for CENP-A<sup>LAP</sup>, from two independent replicates. Error bars, s.e.m. *P* value of 0.608  
373 determined using two-tailed *t*-test. (c) MNase digestion profile showing the nucleosomal DNA  
374 length distributions of bulk input mono-nucleosomes (upper panel) and purified CENP-A<sup>LAP</sup>  
375 following native ChIP at G1 and G2. (d) Number of CENP-A binding peaks at  $\alpha$ -satellite DNA  
376 in CENP-A<sup>TAP</sup> and CENP-A<sup>+LAP</sup> cells at G1 and G2. The number represent peaks that are  
377 overlapping between the two replicates. (e) CENP-A ChIP-seq shows CENP-A binding peaks  
378 at the centromere of chromosome 18 for CENP-A<sup>LAP</sup> and CENP-A<sup>TAP</sup> before and after DNA  
379 replication. CENP-A peaks across the reference model are a result of multi-mapping and their  
380 exact linear order is not known. SICER peaks are shown in black below the raw read data. Two  
381 replicates are shown for each condition. Scale bar, 2Mb.

382 **Figure 2. Retention of centromeric CENP-A through DNA replication.** (a, b) CENP-A ChIP-  
383 seq raw mapping data (colored) and SICER peaks (black lines, underneath) showing  
384 sequences bound by CENP-A (at both endogenous and increased expression levels) across  
385 centromere reference model of chromosome 8, before and after DNA replication. Upper part  
386 shows mapping of all reads (including reads that are multi-mapping) onto the repetitive  
387  $\alpha$ -satellite DNA. Lower part shows read mapping to sites that are single copy in the HuRef  
388 genome (single-mapping), after filtering out multi-mapping reads. Centromere reference  
389 location, red. CENP-B box location, orange. Scale bar, 500kb (a), 10kb (b). (c) High-resolution  
390 view of read mapping to a site that is single copy in centromere reference model of chromosome

391 8, marked by a purple bar in (a). Scale bar, 200bp. (d) High-resolution view of read mapping to  
392 a site that is single copy in centromere reference model of chromosome 8, marked by a green  
393 bar in (a). Scale bar, 500bp. (e, f) High-resolution view of read mapping to a site that is single  
394 copy in centromere reference model of chromosome 2 (e) and in the centromere reference  
395 model of chromosome 10 (f). Scale bar, 200bp (e) and 500bp (f). (g) Left, overlap between G1  
396 and G2 CENP-A single mapping binding sites at  $\alpha$ -satellite HOR sequences. Right, peak  
397 overlap between G1 CENP-A<sup>TAP</sup> (increased expression) and CENP-A<sup>LAP</sup> (endogenous level)  
398 single mapping binding sites at  $\alpha$ -satellite HOR sequences.

399 **Figure 3. Sites of CENP-A assembly onto chromosome arms in early G1 are removed by**  
400 **G2.** (a) ChIP-sequencing raw mapping data (colored) and SICER peaks (black lines,  
401 underneath) showing sequences bound by CENP-A (at both endogenous and increased  
402 expression levels) across chromosome 4 before and after DNA replication. Centromere  
403 reference location, red. CENP-B box location, orange. Read counts were scale to 30 but  
404 reaches 150 at the centromere. Scale bar, 50Mb. (b) ChIP-sequencing data are shown for a  
405 region within the p-arm of chromosome 4, with two replicates for each time point, for CENP-  
406 A<sup>TAP</sup> (increased CENP-A expression), CENP-A<sup>LAP</sup> (endogenous level), and H3.1<sup>TAP</sup>. Scale bar,  
407 2Mb. (c) High resolution nucleosomal view of CENP-A<sup>TAP</sup> mapping data at G1 and G2 at a non-  
408 centromeric site of chromosome 4. Scale bar, 1kb. (d) Total number of non- $\alpha$ -satellite CENP-A  
409 binding sites for CENP-A<sup>TAP</sup> and CENP-A<sup>LAP</sup> at G1 and G2. The number represent peaks that  
410 are overlapping between the two replicates. (e) Number of non- $\alpha$ -satellite CENP-A SICER  
411 binding sites called at G1 or G2 at different fold thresholds (above background).

412 **Figure 4. Ectopic CENP-A is removed following DNA replication from the arms of all 23**  
413 **human chromosomes.** CENP-A<sup>TAP</sup> ChIP-sequencing raw mapping data at G1 (red) and G2

414 (blue) for all human chromosomes. Chromosome X show a spike of CENP-A enrichment not  
415 removed by G2 (marked by an asterisk).

416 **Figure 5. Sites of deposition of CENP-A on chromosome arms are not seeding hotspots**  
417 **for neocentromere formation.** (a) Read mapping data of CENP-A<sup>TAP</sup> ChIP-sequencing at G1  
418 and G2, at the chromosomal location of a known patient derived neocentromere <sup>28</sup> found in  
419 chromosome 4. (b) Greater than 80% of CENP-A SICER peaks  $\geq$  5-fold in randomly cycling  
420 and G1 cells overlap with DNase I hypersensitive sites taken from ENCODE project. (c)  
421 Example from the chromosome 4 p-arm showing overlap of at least 100 bases between SICER  
422 peaks  $\geq$  5-fold and HeLa S3 DNase I hypersensitive sites taken from ENCODE project. (d, e)  
423 CENP-A<sup>TAP</sup> (d) or CENP-A<sup>LAP</sup> (e) enrichment levels at DNase I hypersensitive sites. SICER  
424 peaks  $\geq$  5-fold supported between the two replicates were analyzed for their enrichment level  
425 at DNase I hypersensitive sites, with minimum overlap of 100 bases, compared to the level of  
426 enrichment at these sites by chance.

427 **Figure 6. Ectopic CENP-A is removed contemporaneously with replication fork**  
428 **progression, while centromeric CENP-A is retained.** (a) Schematic representation of CENP-  
429 A ChIP-seq combined with Repli-seq experiment across S phase. (b) Raw mapping data of  
430 CENP-A<sup>TAP</sup> ChIP-seq at G1 (red) and BrdU repli-seq (grey scale) at early S (S1), mid S (S4)  
431 and late S/G2 (S7) at the q-arm of chromosome 20. SICER peaks, black lines are drawn  
432 underneath the raw mapping data. Scale bar, 5 Mb. (c) The percentage of ectopic G1 CENP-  
433 A<sup>TAP</sup>  $\geq$ 5-fold binding sites that are found in early, mid, or late S replicating regions. N=2 for from  
434 two independent replicates. Error bars, s.e.m. (d) Percentage of BrdU SICER peaks at  $\alpha$ -  
435 satellite DNA found within early, mid or late S replicating regions. N=2 for from two independent  
436 replicates. Error bars, s.e.m. *P* value of 0.0011 determined using two-tailed *t*-test. (e) CENP-A



437   ChIP-seq raw mapping data at a part of cen18 at G1, mid S phase and G2, and BrdU repli-seq  
438   at early S (S1), mid S (S4) and late S/G2 (S7). SICER peaks are denoted as black lines  
439   underneath the raw mapping data. Centromere reference location, red. CENP-B boxes, orange.  
440   Scale bar, 10kb. **(f)** High-resolution view of CENP-A mapping during DNA replication (mid-S) to  
441   a single copy site (marked by a purple bar in Fig. 2a) in the centromere reference model of  
442   chromosome 8. Data from Figure 2c for CENP-A<sup>TAP</sup> G1 and G2 is included for comparison.  
443   Scale bar, 200bp. **(g)** Complete overlap between CENP-A G1 and mid-S single mapping  
444   binding sites (after filtering out multi-mapping reads) is found at  $\alpha$ -satellite HORs sequences.  
445   **(h, j, l)** Raw mapping data (colored) and SICER peaks (black lines, underneath) of CENP-A<sup>TAP</sup>  
446   ChIP-seq at G1, mid S phase and G2 and BrdU labeled repli-seq samples (grey scale) showing  
447   regions going through replication at early S (S1), mid S (S4) and late S/G2 phase (S7) within  
448   the p-arm of chromosome 4 **(h)**, the q-arm of chromosome 10 **(j)**, and the p-arm of chromosome  
449   X. Early replicating CENP-A<sup>TAP</sup> G1 peaks **(h, j)** are removed by mid S phase. Mid-S replicating  
450   CENP-A<sup>TAP</sup> G1 **(j)** peaks are removed by G2. Late replicating CENP-A<sup>TAP</sup> G1 peaks **(l)** are  
451   removed by G2. Scale bars, 1kb. **(i)** Early replicating CENP-A<sup>TAP</sup> G1 peaks ( $\geq 5$ -fold over  
452   background - shown in **(h)** for chromosome 4) were analyzed for their retention at mid S phase.  
453   N=2 for from two independent replicates. Error bars, s.e.m. About 70% of early replicating  
454   CENP-A<sup>TAP</sup> G1 peaks are removed by mid S phase. **(k)** Mid-S replicating CENP-A<sup>TAP</sup> G1 peaks  
455   ( $\geq 5$ -fold over background - shown in **(j)** for chromosome 10) were analyzed for their retention  
456   at G2. N=2 for from two independent replicates. Error bars, s.e.m. 90% of mid replicating CENP-  
457   A peaks are removed by G2. **(m)** Late replicating CENP-A<sup>TAP</sup> G1 peaks ( $\geq 5$ -fold over  
458   background - shown in **(l)** for chromosome X) were analyzed for their retention at G2. N=2 for  
459   from two independent replicates. Error bars, s.e.m. 85% of late replicating CENP-A<sup>TAP</sup> G1 peaks  
460   are removed by G2. **(n)** CENP-A<sup>TAP</sup> was immunoprecipitated from the chromatin fraction of

461 randomly cycling cells or late S/G2 synchronized cells followed by mass spectrometry to identify  
462 the co-precipitated partners. All the CCAN network components were co-precipitated with  
463 CENP-A at late S/G2. (o) CENP-A<sup>TAP</sup> was immunoprecipitated from micrococcal nuclease  
464 resistant chromatin isolated at different cell cycle phases and the immunoprecipitates were  
465 examined by immunoblotting for CAF1 complex subunits and MCM2. (p) Model for maintaining  
466 centromeric CENP-A while removing it from non-centromeric sites on the chromosome arms  
467 during DNA replication to ensure maintenance of centromere identity across the cell cycle.

468 **Supplementals figure legends**

469 **Supplementary Figure S1. Identification of peaks enriched for CENP-A binding. (a)**

470 Scheme showing experimental design for tagging an endogenous CENP-A locus to produce  
471 CENP-A<sup>+LAP</sup> HeLa cells. These cells were then adapted to suspension growth. **(b)** Scheme  
472 showing the experimental design for obtaining increased levels of CENP-A<sup>TAP</sup> expression.  
473 CENP-A<sup>TAP</sup> is expressed in these cells at 4.5-fold the level of CENP-A in the parental HeLa  
474 cells <sup>8</sup>. **(c, d)** Localization of endogenously tagged CENP-A<sup>LAP</sup> **(c)** and CENP-A<sup>TAP</sup> **(d)**  
475 determined with indirect immunofluorescence using anti-GFP antibody **(c)** or rabbit-IgG **(d)**.  
476 Scale bar, 5  $\mu$ m. **(e)** FACS analysis of DNA content showing the synchronization efficiency of  
477 CENP-A<sup>+LAP</sup> and CENP-A<sup>TAP</sup> HeLa cell lines. **(f, g)** Examples of centromeric regions of  
478 chromosome 7 **(f)** and 5 **(g)** showing increased occupancy of overexpressed CENP-A<sup>TAP</sup>  
479 (compare CENP-A<sup>TAP</sup> with CENP-A<sup>LAP</sup>). **(h)** Overlap between G1 and G2 CENP-A binding  
480 peaks at  $\alpha$ -satellite sequences.

481 **Supplementary Figure S2. CENP-A ChIP-seq identifies CENP-A binding at reference**

482 **centromeres of 23 human chromosomes.** CENP-A<sup>LAP</sup> bound DNAs at G1 and G2 were  
483 sequenced, with 2 replicates per condition, and mapped to the centromeric reference models  
484 in the hg38 assembly <sup>46</sup>. Shown are the raw mapping data (colored) for every human  
485 centromere (except for the centromere of chromosome 19 that shares almost all of its  $\alpha$ -  
486 satellites arrays with  $\alpha$ -satellites arrays of chromosomes 1 and 5) and CENP-A binding called  
487 as SICER peaks (black lines, underneath) for one replicate for each time point. Centromere  
488 reference location, red. CENP-B box, orange.

489 **Supplementary Figure S3. Ectopic deposition of CENP-A into open and active chromatin**

490 **at G1 does not function as a seeding hotspot for neocentromere formation. (a, b) Read**

491 mapping data of CENP-A<sup>TAP</sup> ChIP-sequencing at G1 (red) and G2 (blue), at the chromosomal  
492 location of 2 known patient derived neocentromeres<sup>28</sup> found in chromosome 8 (a) and  
493 chromosome 13 (b). (c-f) Fold enrichment of CENP-A<sup>TAP</sup> chromatin in randomly cycling cells or  
494 at G1 or G2 (c, d) and CENP-A<sup>LAP</sup> chromatin (e, f) at G1 or G2 at different genomic locations.  
495 SICER peaks  $\geq$  5-fold supported between two replicates were analyzed for their enrichment  
496 level at different genomic locations, compared to the level of enrichment at these sites by  
497 chance.

498 **Supplementary Figure S4. Centromeres are late replicating with CENP-A remaining**  
499 **tethered locally by continued binding to the CCAN complex.** (a) FACS analysis of DNA  
500 content showing the synchronization efficiency of CENP-A<sup>TAP</sup> HeLa cell line across S phase.  
501 (b) Genomic DNA of cells labeled for 1 hour with BrdU was sonicated prior to the BrdU  
502 immunoprecipitation and fragments of 200-800bp were obtained. (c) Quantitative real-time PCR  
503 for MRGPRES and MMP15 validates their early replication timing as previously reported [ref<sup>57</sup>  
504 and ENCODE Repli-seq]. N=2, from two independent replicates. Error bars, s.e.m. (d)  
505 Quantitative real-time PCR for HBE1 and Sat2 was used to validate their late replication timing,  
506 as previously reported [ref<sup>58</sup> and ENCODE Repli-seq]. N=2, from two independent replicates.  
507 Error bars, s.e.m. (e) Quantitative real-time PCR for  $\alpha$ -satellite DNA. N=2, from two independent  
508 replicates. Error bars, s.e.m. (f) MNase digestion profile showing the nucleosomal DNA length  
509 distributions of bulk input mono-nucleosomes (upper panel) and purified CENP-A<sup>TAP</sup> following  
510 native ChIP at early S and mid S phase. (g) CENP-A ChIP-seq raw mapping data spanning the  
511 whole of cen18 at G1, mid S phase and G2, and BrdU repli-seq at early S (S1), mid S (S4) and  
512 late S/G2 (S7). SICER peaks are denoted as black lines underneath the raw mapping data.  
513 Centromere reference location, red. CENP-B boxes, orange. Scale bar, 2Mb. (h) Ethidium  
514 Bromide stained DNA agarose gel showing MNase digestion profile of bulk chromatin used for

515 mass spectrometry identification of proteins associating with CENP-A<sup>TAP</sup> chromatin (left panel)  
516 and for CENP-A<sup>TAP</sup> co-immunoprecipitation experiment (right panel). **(i-m)** CENP-A<sup>TAP</sup>  
517 immunopurification followed by mass spectrometry identifies association with CENP-A  
518 chromatin of DNA replication related proteins **(i,j)**, chromatin remodeling factors and nuclear  
519 chaperones **(k)**, histones **(l)** and centromere and kinetochore proteins **(m)**.

520

## 521 **Materials and Methods**

522 **Cell lines.** Adherent HeLa cells stably expressing CENP-A<sup>TAP</sup> or H3.1<sup>TAP</sup> by retrovirus infection  
523 <sup>23</sup> or endogenously tagged CENP-A<sup>+LAP</sup> by infection of a rAAV harboring a LAP targeting  
524 construct containing homology arms for CENP-A<sup>43</sup> were adapted to suspension growth by  
525 selecting surviving cells and were maintained in DMEM medium (Gibco) containing 10% fetal  
526 bovine serum (Omega Scientific), 100U/ml penicillin, 100U/ml streptomycin and 2mM l-  
527 glutamine at 37°C in a 5% CO<sub>2</sub> atmosphere with 21% oxygen. Cells were maintained and split  
528 every 4-5 days according to ATCC recommendations.

529 **Cell synchronization.** Cells were synchronized as previously described<sup>8</sup>. Briefly, suspension  
530 HeLa cells were treated with 2 mM thymidine in complete medium for 19 h, pelleted and washed  
531 twice in PBS, and released in complete medium containing 24 μM deoxycytidine for 9 h followed  
532 by addition of thymidine to a final concentration of 2 mM for 16 h, after which cells were released  
533 again into complete medium containing 24 μM deoxycytidine. For G2, cells were harvested 7  
534 hours after release from the second thymidine block. For G1, thymidine was added for a third  
535 time, 7 hours after the release and cells were harvested 11 hours after that (a total of 18 hours  
536 after the release from the second thymidine block).

537 **Chromatin extraction.** Chromatin was extracted Nuclei from 1×10<sup>9</sup> nuclei of HeLa cells as  
538 previously described<sup>8</sup>. Nuclei from 1×10<sup>9</sup> HeLa cells were prepared by pelleting and  
539 resuspending cells in buffer containing 3.75 mM Tris at pH 7.5, 20 mM KCl, 0.5 mM EDTA, 0.5  
540 mM DTT, 0.05 mM spermidine, 0.125 mM spermine, 1 mM PMSF and 0.1% digitonin. Cells were  
541 homogenized with 10 strokes and nuclei were pelleted at 300g. Nuclei were then washed once  
542 in wash buffer (20 mM HEPES at pH 7.7, 20 mM KCl, 0.5 mM EDTA, 0.5 mM DTT and 0.5 mM  
543 PMSF), followed by wash buffer containing 150 mM NaCl. Nuclei were resuspended in wash

544 buffer supplemented with 150 mM NaCl and 3 mM CaCl<sub>2</sub>. Chromatin was digested at room  
545 temperature using 140 units ml<sup>-1</sup> of micrococcal nuclease (Roche, 10107921001) for 35  
546 minutes to produce a pool of mono-nucleosomes. Following micrococcal nuclease treatment,  
547 extracts were supplemented with 5 mM EGTA and 0.05% NP40 and centrifuged at 10,000g for  
548 15 min at 4 °C. The supernatant was then used as the starting material for all  
549 immunopurifications.

550 **Affinity purification.** TAP- or LAP -tagged chromatin were purified in two steps. In the first  
551 step, native TAP-tagged chromatin was immunoprecipitated by incubating the bulk soluble  
552 mono-nucleosome pool with rabbit IgG (Sigma-Aldrich) coupled to Dynabeads M-270 Epoxy  
553 (Thermo Fisher Scientific, 14301). Alternatively, CENP-A<sup>LAP</sup> chromatin was immunoprecipitated  
554 using mouse anti-GFP antibody (clones 19C8 and 19F7, Monoclonal Antibody Core Facility at  
555 Memorial Sloan-Kettering Cancer Center, New York) <sup>87</sup> coupled to Dynabeads M-270 Epoxy.  
556 Chromatin extracts were incubated with antibody bound beads for 16 h at 4 °C. Bound  
557 complexes were washed once in buffer A (20 mM HEPES at pH 7.7, 20 mM KCl, 0.4 mM EDTA  
558 and 0.4 mM DTT), once in buffer A with 300 mM KCl and finally twice in buffer A with 300 mM  
559 KCl, 1 mM DTT and 0.1% Tween 20. In the second step, TAP-chromatin complexes were  
560 incubated 16 h in final wash buffer with 50µl recombinant TEV protease, resulting in cleavage  
561 of the TAP tag and elution of the chromatin complexes from the beads. Alternatively, CENP-  
562 A<sup>LAP</sup> chromatin was eluted from the beads by cleaving the LAP tag using PreScission protease  
563 (4 h, 4°C).

564 **DNA extraction.** Following elution of the chromatin from the beads, Proteinase K (100 µg/ml)  
565 was added and samples were incubated for 2 h at 55°C. DNA was purified from proteinase K  
566 treated samples using a DNA purification kit following the manufacturer instructions (Promega,

567 Madison, USA) and was subsequently analyzed either by running a 2% low melting agarose  
568 (APEX) gel or by an Agilent 2100 Bioanalyzer by using the DNA 1000 kit. The Bioanalyzer  
569 determines the quantity of DNA on the basis of fluorescence intensity.

570 **Quantitative real-time PCR (qPCR).** Quantitative real-time PCR (qPCR) was performed using  
571 SYBR Green mix (Bio Rad) with CFX384 Bio Rad Real Time System. Primers sequences used  
572 in this study: MRGPRES: (forward) 5'-CTGCGCGGATCTCATCTTCC-3' and (reverse) 5'-  
573 GGCCACGATGTAGCAGAA-3'. MMP15: (forward) 5'-GTGCTCGACGAAGAGACCAAG-3'  
574 and (reverse) 5'-TTTCACTCGTACCCCGAACTG-3'. HBE1: (forward) 5'-  
575 ATGGTGCATTTTACTGCTGAGG-3' and (reverse) 5'-GGGAGACGACAGGTTTCCAAA-3'.  
576 Sat2: (forward) 5'-TCGCATAGAATCGAATGGAA-3' and (reverse) 5'-  
577 GCATTCGAGTCCGTGGA-3'<sup>16</sup>.  $\alpha$ -satellite DNA (from chromosomes 1, 3, 5, 10, 12 and 16):  
578 (forward) 5'-CTAGACAGAAGAATTCTCAG-3' and (reverse) 5'-CTGAAATCTCCACTTGC-3'<sup>55</sup>.  
579 Melting curve analysis was used to confirm primer specificity. To ensure linearity of the standard  
580 curve, reaction efficiencies over the appropriate dynamic range were calculated. Using the dCt  
581 method, we calculated fold-enrichment of  $\alpha$ -satellite DNA after immunopurification of CENP-  
582 A<sup>TAP</sup> chromatin, compared to its level in the bulk input chromatin. For Repli-seq experiment, we  
583 used the dCt method, to calculate fold-enrichment of replicated DNA after immunopurification  
584 of BrdU-labeled DNA compared to its level in the bulk input DNA. Reported values are the  
585 means of two independent biological replicates with technical duplicates that were averaged for  
586 each experiment. Error bars represent SE of the mean.

587 **Immunoblotting.** For immunoblot analysis, protein samples were separated by SDS-PAGE,  
588 transferred onto PVDF membranes (Millipore) and then probed with the following antibodies:  
589 rabbit anti-CENP-A (Cell Signaling, 2186s, 1:1,000), rabbit anti-CENP-B (Millipore, 07-735,



590 1:200), mouse anti- $\alpha$ -tubulin (Abcam, DM1A, 1:5000), rabbit anti-CAF1p150 (Santa Cruz, sc-  
591 10772, 1:500), rabbit anti-CAF1p60 (Bethyl Laboratories, A301-085A, 1:1,000), rabbit anti-  
592 CAF1p48 (Bethyl Laboratories, A301-206A, 1:1,000), rabbit anti-MCM2 (Abcam, Ab4461,  
593 1:1,000). Following incubation with HRP-labelled antibody (GE Healthcare, NA931V or  
594 NA934V), HRP was detected using enhanced chemiluminescence (ECL) substrate (Thermo  
595 Scientific, 34080 or 34096).

596 **Immunofluorescence.**  $1 \times 10^6$  suspension cells were centrifuged and resuspended with PBS.  
597  $10^5$  cells were immobilized on glass slide by cytopspin centrifugation for 3 min, 800rpm. Cells  
598 were then fixed using ice-cold methanol at  $-20^\circ\text{C}$  for 10 min, followed by washing with cold PBS  
599 and then incubated in Triton Block (0.2 M glycine, 2.5% FBS, 0.1% Triton X-100, PBS) for one  
600 hour. The following primary antibodies were used: mouse anti-GFP (Roche, 11814460001,  
601 1:500), rabbit anti-CENP-B (Abcam 25734, 1:1,000), human anti-centromere antibodies (ACA,  
602 Antibodies Inc, 15-234-0001, 1:500). The following secondary antibodies (Jackson  
603 Laboratories) were used for 45 minutes: donkey anti-human TR (1:300), anti-mouse FITC  
604 (1:250). TAP fusion proteins were visualized by incubation with FITC-rabbit IgG (Jackson  
605 Laboratories, 1:200). Cells were then washed with 0.1% Triton X-100 in PBS, counterstained  
606 with DAPI and mounted with mounting medium (Molecular Probes, P36934).  
607 Immunofluorescent images were acquired on a Deltavision Core system at x60-100  
608 magnification.  $0.2 \mu\text{m}$  Z-stack deconvolved projections were generated using the softWoRx  
609 program.

610 **Flow cytometry.** Flow cytometry was used to determine the DNA content of the cells as.  $1 \times 10^6$   
611 cells were harvested, washed in PBS and fixed in 70% ethanol. Cells were then washed and  
612 DNA was stained by incubating cells for 30 min with 1% FBS,  $10 \mu\text{g ml}^{-1}$  propidium iodide and

613 0.25 mg ml<sup>-1</sup> RNase A in PBS followed by FACS analysis for DNA content using a BD LSR II  
614 Flow Cytometer (BD Biosciences).

615 **ChIP-Seq Library Generation and Sequencing.** ChIP libraries were prepared following  
616 Illumina protocols with minor modifications (Illumina, San Diego, CA). To reduce biases induced  
617 by PCR amplification of a repetitive region, libraries were prepared from 80-100 ng of input or  
618 ChIP DNA. The DNA was end-repaired and A-tailed and Illumina Truseq adaptors were ligated.  
619 Libraries were run on a 2% agarose gel. Since the chromatin was digested to  
620 mononucleosomes, following adaptors ligation the libraries size was 250-280 bp. The libraries  
621 were size selected for 200-375 bp. The libraries were then PCR-amplified using only 5-6 PCR  
622 cycles since the starting DNA amount was high. Resulting libraries were sequenced using 100  
623 bp, paired-end sequencing on a HiSeq 2000 instrument per manufacturer's instructions with  
624 some modifications (Illumina, San Diego, CA). Sequence reads are summarized in Table S1.

625 **Initial sequence processing and alignment.** Illumina paired-end reads were merged to  
626 determine CENP-A or H3 containing target fragments of varying length using PEAR software  
627 <sup>88</sup>, with standard parameters (p-value: 0.01, min-overlap: 10 bases, min-assembly length:  
628 50bp). Merged paired reads were mapped (Bwa-Mem, standard parameters <sup>89,90</sup>) to the human  
629 genome 38 (hg38) assembly (including alternative assemblies), which contain human  $\alpha$ -satellite  
630 sequence models in each centromeric region (<sup>45</sup>; BioProject: PRJNA193213; <sup>46</sup>). Reads were  
631 determined to contain  $\alpha$ -satellite if they overlapped sites (BEDTools: intersect <sup>91</sup>) in the genome  
632 previously annotated as  $\alpha$ -satellite (UCSC table browser <sup>92</sup> was used to obtain a bed file of all  
633 sites annotated as ALR/ $\alpha$ -Satellite). Additionally, merged sequences were defined as  
634 containing  $\alpha$ -satellite if they contained an exact match to at least two 18-mers specific to a  
635 previously published WGS read database of  $\alpha$ -satellite, representing 2.6% of sequences from

636 the HuRef genome <sup>21,48</sup>. Comparisons between the Bwa mapping and 18-mer exact matching  
637 based strategies were highly concordant. Total  $\alpha$ -satellite DNA content in human genome 38  
638 assembly was estimated by using the UCSC RepeatMasker Annotation <sup>92,93</sup>. Summary of reads  
639 obtained is shown in Table S1.

640 **ChIP-seq peak calling.** Enrichment peaks for ChIP experiments were determined using SICER  
641 algorithm (v1.0.3) <sup>50</sup> using relevant input reads as background, with stringent parameters  
642 previously optimized for human CENP-A <sup>36</sup>: threshold for redundancy allowed for chip reads: 1,  
643 threshold for redundancy allowed for control reads: 1, window size: 200 bps, fragment size: 150  
644 bps, shift in window length is 150, effective genome size as a fraction of the reference genome  
645 of hg38: 0.74, gap size: 400 bps, e-value for identification of candidate islands that exhibit  
646 clustering: 1000, and false discovery rate controlling significance: 0.00001. In parallel, MACs  
647 peak calling was performed (macs14) <sup>49</sup>, and wiggle tracks were created to represent read  
648 depth of each dataset independently. Finally, we performed a final, rigorous evaluation of  
649 ectopic CENP-A peaks, or peaks predicted outside of centromeric regions, using k-mer  
650 enrichment (previously described <sup>21</sup>). Each ectopic peak was reformatted into 50-bp sliding  
651 windows (in both orientations, with slide of 1bp). The normalized frequency of each 50-mer  
652 candidate windows were evaluated in each ChIP-seq dataset relative to a normalized observed  
653 frequency in the corresponding background dataset. Scores were determined as the log  
654 transformed normalized value of the ratio between ChIP-seq and background, and those with  
655 a score greater than or equal to 2 were included in our study as a high-confident enrichment  
656 set.

657 **Analysis of CENP-A peaks overlap with functional annotation.** Ectopic CENP-A peak calls,  
658 i.e. those that did not overlap with centromeric  $\alpha$ -satellite DNA, were evaluated for enrichment

659 with functional annotation if they were supported between replicate ChIP-seq experiments and  
660 overlapped at least one enriched 50mer with a log-transformed normalized ratio  $\geq 2$ , or with a  
661 minimum standard ratio of 5-fold. Resulting high-confident ectopic peak calls were intersected  
662 (BEDTools: intersect; <sup>91</sup> with select functional datasets in the genome (UCSC table browser, <sup>92</sup>.  
663 Peaks that intersect with GRCh38 RefSeq genes (including introns and exons) w/ minimum  
664 overlap (-f 0.9; or 90%) required as a fraction of SICER peaks, as well as 1000 bp upstream and  
665 downstream (with minimum overlap of 1bp with SICER peak). To evaluate the role of  
666 expression, gene annotation was catalogued further based on Intersection with ENCODE HeLa  
667 expression data (wgEncodeRegTxnCshlLongRnaSeqHelas3CellPapRawSigPooled) with  
668 RefSeq gene annotations (where 22,211 RefSeq Genes (40.5% of total) demonstrated at least  
669  $\geq 10$  average reads/gene; and highly expressed RefSeq Genes (10,033, or 18.3% of total)  
670 RefSeq genes are defined as  $\geq 100$  average reads/gene). To investigate peak overlap with  
671 sites of CTCF enrichment, we intersected peaks with two ENCODE replicate datasets: HeLa-  
672 S3.CTCF\_Ht1.bed and HeLa-S3.CTCF\_Ht2.bed (with minimum overlap of 20 bp). To study  
673 the overlap with sites of open chromatin peaks were intersected with ENCODE datasets: HeLa-  
674 S3.UW\_DNase1\_HS.Ht1.bed and HeLa-S3.UW\_DNase1\_HS.Ht2.bed with minimum overlap  
675 of 100 bases. Results were evaluated relative to a simulated peak dataset to test if observed  
676 peak counts are higher than expected by chance. Simulations were repeated 100x to provide  
677 basic summary statistics: average, standard deviation, max/min, relative enrichment value and  
678 empirical p-value.

679 **Repli-seq experiments.** BrdU labeled DNA across S phase was prepared as previously  
680 described <sup>56</sup> with some modifications. Briefly, cells were synchronized using double thymidine  
681 block and release <sup>8</sup>. Following release from double thymidine block, cells were labeled with  
682 BrdU (Sigma, B5002) for 1 hour by adding BrdU to the culture medium to a final concentration

683 of 50  $\mu$ M. For labeling at early-S (S1), BrdU was added immediately after release (S0). For  
684 labeling at mid-S (S4), BrdU was added 3 hours after release (S3). For labeling at late-S (S7),  
685 BrdU was added 6 hours after release (S6). Following labeling with BrdU, genomic DNA was  
686 extracted, sonicated and heat denatured as previously described<sup>56</sup>. BrdU labeled DNA was  
687 immunoprecipitated using an anti-BrdU antibody (Becton-Dickinson Biosciences, 555627)  
688 coupled to magnetic Dyna M-270 epoxy beads (Thermo Fisher Scientific, 14301). Eluted single-  
689 stranded DNA was made into double stranded DNA using random-prime extension (Thermo  
690 Fisher Scientific, Random Primers DNA Labeling Kit, 18187-013). Following cleanup of the  
691 double stranded DNA (QIAGEN QiaQuick PCR Purification Kit, 28104), the DNA was validated  
692 by performing quantitative real-time PCR using primers for MRGPRES, MMP15, HBE1 and Sat2.  
693 Libraries were then prepared as described above, and sequenced using the Illumina instrument  
694 per manufacturer's instructions (Illumina, San Diego, CA) with the exception that following  
695 adapter ligation, repli-seq libraries were size selected between 250-500bp.

696 **Mass spectrometry identification of proteins associating with CENP-A<sup>TAP</sup> chromatin.**  
697 CENP-A<sup>TAP</sup> was immunoprecipitated from the chromatin fraction of randomly cycling cells or  
698 late S synchronized cells as described above. Following beads washes, beads were snap  
699 frozen in liquid nitrogen. Samples were diluted using 100 mM Tris pH 8.5 to a final concentration  
700 of 2 M urea and digested with trypsin (Promega) overnight at 37 degrees Celsius. The protein  
701 digests were pressure-loaded onto 250 micron i.d. fused silica capillary (Polymicro  
702 Technologies) columns with a Kasil frit packed with 3 cm of 5 micron Partisphere strong cation  
703 exchange (SCX) resin (Whatman) and 3 cm of 5 micron C18 resin (Phenomenex). After  
704 desalting, each bi-phasic column was connected to a 100 micron i.d. fused silica capillary  
705 (Polymicro Technologies) analytical column with a 5 micron pulled-tip, packed with 10 cm of 5  
706 micron C18 resin (Phenomenex). Each MudPIT column were placed inline with an 1200

707 quaternary HPLC pump (Agilent Technologies) and the eluted peptides were electrosprayed  
708 directly into an LTQ Orbitrap Velos mass spectrometer (Thermo Scientific). The buffer solutions  
709 used were 5% acetonitrile/0.1% formic acid (buffer A), 80% acetonitrile/0.1% formic acid (buffer  
710 B) and 500 mM ammonium acetate/5% acetonitrile/0.1% formic acid (buffer C). A ten-step  
711 MudPIT, each step consisting of a 120 minute elution gradient, was run with salt pulses of 0%,  
712 10%, 20%, 30%, 40%, 50%, 60%, 70% and 100% buffer C and 90% buffer C/10% buffer B.  
713 The MS/MS cycle consisted of one full scan mass spectrum (400-1600 m/z) at 60 K resolution  
714 followed by five data-dependent collision induced dissociation (CID) MS/MS spectra. Charge  
715 state exclusion was enabled with +1 and unassigned charge states rejected for fragmentation.  
716 Application of mass spectrometer scan functions and HPLC solvent gradients were controlled  
717 by the Xcalibur data system (Thermo Scientific). MS/MS spectra were extracted using  
718 RawXtract (version 1.9.9)<sup>94</sup>. MS/MS spectra were searched with the ProLuCID algorithm<sup>95</sup>  
719 against a human UniProt protein database downloaded on 03-25-2014 that had been  
720 supplemented with common contaminants and concatenated to a decoy database in which the  
721 sequence for each entry in the original database was reversed<sup>96</sup>. The ProLuCID search was  
722 performed using full enzyme specificity (cleavage C-terminal to Arg or Lys residue). The data  
723 was searched using a precursor mass tolerance of 50 ppm and a fragment ion mass tolerance  
724 of 600 ppm. The ProLuCID search results were assembled and filtered using the DTASelect  
725 (version 2.0) algorithm<sup>97</sup>. DTASelect assesses the validity of peptide-spectra matches using  
726 the cross-correlation score (XCorr) and normalized difference in cross-correlation scores  
727 ( $\Delta$ CN). The search results are grouped by charge state and tryptic status and each sub-  
728 group is analyzed by discriminant analysis based on a non-parametric fit of the distribution of  
729 forward and reversed matches. A minimum of two peptides was required for each protein  
730 identification. All peptide-spectra matches had less than 10 ppm mass error. The protein false

731 positive rate was below one percent for all experiments.

732 **Quantification and statistical analysis.** For all experiments shown, n is indicated in the figure  
733 legends. Values represent the mean  $\pm$  s.e.m (as indicated in the figure legends).

734 **Data availability.** The datasets generated during the current study were deposited at GEO  
735 under primary accession number GSE111381.

736 The datasets generated during the current study were compared to the following publicly  
737 available datasets: ENCODE HeLa DNase-seq (DNase-1 hyper sensitive sites; GEO  
738 accession: GSE90432), ENCODE HeLa CTCF ChIP-sequencing (GEO accession:  
739 GSM749729 and GSM749739), ENCODE HeLa H3K27me3 ChIP-sequencing (GEO  
740 accession: GSM945208), ENCODE HeLa expression data (UCSC Accession:  
741 wgEncodeEH000130), ENCODE HeLa-S3 Repli-seq (GEO accession: GSM923449).

#### 742 **Author Contributions**

743 Y.N-A. and D.W.C. conceived and designed experiments and wrote the manuscript. Y.N-A  
744 performed experiments. KH.M analyzed the sequencing data. M.A.M. and O.S. analyzed data  
745 and performed experiments. D.F. suggested experiments and provided key experimental input.  
746 A.Y.L and B.R prepared sequencing libraries and provided resources. A.A and J.YIII performed  
747 mass spectrometry experiments and provided resources.

748

749 **Acknowledgments**

750 The authors would like to thank A. Desai, P. Ly and C. Eissler for critical discussion and helpful  
751 suggestions, L.E.T Jansen (Gulbenkian Institute, Oeiras, Portugal) for providing reagents. This  
752 work was supported by grants (R01 GM-074150 and R35 GM-122476) from the National  
753 Institutes of Health to D.W.C., who receives salary support from the Ludwig Institute for Cancer  
754 Research.

755

756 **Conflict of Interests**

757 The authors declare that they have no conflict of interest.



## References

- 758  
759  
760 1. Wevrick, R. & Willard, H.F. Long-range organization of tandem arrays of alpha satellite  
761 DNA at the centromeres of human chromosomes: high-frequency array-length  
762 polymorphism and meiotic stability. *Proc Natl Acad Sci U S A* **86**, 9394-8 (1989).
- 763 2. Cleveland, D.W., Mao, Y. & Sullivan, K.F. Centromeres and kinetochores: from  
764 epigenetics to mitotic checkpoint signaling. *Cell* **112**, 407-21 (2003).
- 765 3. Willard, H.F. Chromosome-specific organization of human alpha satellite DNA. *American*  
766 *journal of human genetics* **37**, 524-32 (1985).
- 767 4. Manuelidis, L. & Wu, J.C. Homology between human and simian repeated DNA. *Nature*  
768 **276**, 92-4 (1978).
- 769 5. Earnshaw, W.C. & Rothfield, N. Identification of a family of human centromere proteins  
770 using autoimmune sera from patients with scleroderma. *Chromosoma* **91**, 313-21  
771 (1985).
- 772 6. Palmer, D.K., O'Day, K., Wener, M.H., Andrews, B.S. & Margolis, R.L. A 17-kD  
773 centromere protein (CENP-A) copurifies with nucleosome core particles and with  
774 histones. *J Cell Biol* **104**, 805-15 (1987).
- 775 7. Bodor, D.L. *et al.* The quantitative architecture of centromeric chromatin. *eLife* **3**, e02137  
776 (2014).
- 777 8. Nechemia-Arbely, Y. *et al.* Human centromeric CENP-A chromatin is a homotypic,  
778 octameric nucleosome at all cell cycle points. *J Cell Biol* **216**, 607-621 (2017).
- 779 9. Sullivan, B.A. & Karpen, G.H. Centromeric chromatin exhibits a histone modification  
780 pattern that is distinct from both euchromatin and heterochromatin. *Nature structural &*  
781 *molecular biology* **11**, 1076-83 (2004).
- 782 10. Sullivan, L.L., Boivin, C.D., Mravinac, B., Song, I.Y. & Sullivan, B.A. Genomic size of  
783 CENP-A domain is proportional to total alpha satellite array size at human centromeres  
784 and expands in cancer cells. *Chromosome Res* **19**, 457-70 (2011).
- 785 11. Karpen, G.H. & Allshire, R.C. The case for epigenetic effects on centromere identity and  
786 function. *Trends in genetics : TIG* **13**, 489-96 (1997).
- 787 12. Stimpson, K.M. & Sullivan, B.A. Epigenomics of centromere assembly and function.  
788 *Current opinion in cell biology* **22**, 772-80 (2010).
- 789 13. Marshall, O.J., Chueh, A.C., Wong, L.H. & Choo, K.H. Neocentromeres: new insights  
790 into centromere structure, disease development, and karyotype evolution. *Am J Hum*  
791 *Genet* **82**, 261-82 (2008).
- 792 14. Okada, T. *et al.* CENP-B controls centromere formation depending on the chromatin  
793 context. *Cell* **131**, 1287-300 (2007).

- 794 15. Ohzeki, J., Nakano, M., Okada, T. & Masumoto, H. CENP-B box is required for de novo  
795 centromere chromatin assembly on human alphoid DNA. *J Cell Biol* **159**, 765-75 (2002).
- 796 16. Ohzeki, J. *et al.* Breaking the HAC Barrier: histone H3K9 acetyl/methyl balance regulates  
797 CENP-A assembly. *EMBO J* **31**, 2391-402 (2012).
- 798 17. Kouprina, N. *et al.* Cloning of human centromeres by transformation-associated  
799 recombination in yeast and generation of functional human artificial chromosomes.  
800 *Nucleic Acids Res* **31**, 922-34 (2003).
- 801 18. Harrington, J.J., Van Bokkelen, G., Mays, R.W., Gustashaw, K. & Willard, H.F. Formation  
802 of de novo centromeres and construction of first-generation human artificial  
803 microchromosomes. *Nat Genet* **15**, 345-55 (1997).
- 804 19. Grimes, B.R., Rhoades, A.A. & Willard, H.F. Alpha-satellite DNA and vector composition  
805 influence rates of human artificial chromosome formation. *Mol Ther* **5**, 798-805 (2002).
- 806 20. Maloney, K.A. *et al.* Functional epialleles at an endogenous human centromere. *Proc*  
807 *Natl Acad Sci U S A* **109**, 13704-9 (2012).
- 808 21. Hayden, K.E. *et al.* Sequences associated with centromere competency in the human  
809 genome. *Molecular and cellular biology* **33**, 763-72 (2013).
- 810 22. Fachinetti, D. *et al.* A two-step mechanism for epigenetic specification of centromere  
811 identity and function. *Nature cell biology* **15**, 1056-66 (2013).
- 812 23. Foltz, D.R. *et al.* The human CENP-A centromeric nucleosome-associated complex.  
813 *Nature cell biology* **8**, 458-69 (2006).
- 814 24. Okada, M. *et al.* The CENP-H-I complex is required for the efficient incorporation of newly  
815 synthesized CENP-A into centromeres. *Nat Cell Biol* **8**, 446-57 (2006).
- 816 25. Hori, T. *et al.* CCAN makes multiple contacts with centromeric DNA to provide distinct  
817 pathways to the outer kinetochore. *Cell* **135**, 1039-52 (2008).
- 818 26. Hori, T., Shang, W.H., Takeuchi, K. & Fukagawa, T. The CCAN recruits CENP-A to the  
819 centromere and forms the structural core for kinetochore assembly. *The Journal of cell*  
820 *biology* **200**, 45-60 (2013).
- 821 27. Padeganeh, A. *et al.* Octameric CENP-A nucleosomes are present at human  
822 centromeres throughout the cell cycle. *Current biology : CB* **23**, 764-9 (2013).
- 823 28. Hasson, D. *et al.* The octamer is the major form of CENP-A nucleosomes at human  
824 centromeres. *Nature structural & molecular biology* **20**, 687-95 (2013).
- 825 29. Jansen, L.E., Black, B.E., Foltz, D.R. & Cleveland, D.W. Propagation of centromeric  
826 chromatin requires exit from mitosis. *The Journal of cell biology* **176**, 795-805 (2007).
- 827 30. Mellone, B.G. *et al.* Assembly of Drosophila centromeric chromatin proteins during  
828 mitosis. *PLoS genetics* **7**, e1002068 (2011).

- 829 31. Schuh, M., Lehner, C.F. & Heidmann, S. Incorporation of *Drosophila* CID/CENP-A and  
830 CENP-C into centromeres during early embryonic anaphase. *Curr Biol* **17**, 237-43  
831 (2007).
- 832 32. Nechemia-Arbely, Y., Fachinetti, D. & Cleveland, D.W. Replicating centromeric  
833 chromatin: spatial and temporal control of CENP-A assembly. *Experimental cell research*  
834 **318**, 1353-60 (2012).
- 835 33. Foltz, D.R. *et al.* Centromere-specific assembly of CENP-a nucleosomes is mediated by  
836 HJURP. *Cell* **137**, 472-84 (2009).
- 837 34. Dunleavy, E.M. *et al.* HJURP is a cell-cycle-dependent maintenance and deposition  
838 factor of CENP-A at centromeres. *Cell* **137**, 485-97 (2009).
- 839 35. Silva, M.C. *et al.* Cdk activity couples epigenetic centromere inheritance to cell cycle  
840 progression. *Developmental Cell* **22**, 52-63 (2012).
- 841 36. Lacoste, N. *et al.* Mislocalization of the centromeric histone variant CenH3/CENP-A in  
842 human cells depends on the chaperone DAXX. *Molecular cell* **53**, 631-44 (2014).
- 843 37. Van Hooser, A.A. *et al.* Specification of kinetochore-forming chromatin by the histone H3  
844 variant CENP-A. *Journal of cell science* **114**, 3529-42 (2001).
- 845 38. Shrestha, R.L. *et al.* Mislocalization of centromeric histone H3 variant CENP-A  
846 contributes to chromosomal instability (CIN) in human cells. *Oncotarget* **8**, 46781-46800  
847 (2017).
- 848 39. Filipescu, D. *et al.* Essential role for centromeric factors following p53 loss and oncogenic  
849 transformation. *Genes Dev* **31**, 463-480 (2017).
- 850 40. Heun, P. *et al.* Mislocalization of the *Drosophila* centromere-specific histone CID  
851 promotes formation of functional ectopic kinetochores. *Developmental Cell* **10**, 303-15  
852 (2006).
- 853 41. Au, W.C., Crisp, M.J., DeLuca, S.Z., Rando, O.J. & Basrai, M.A. Altered dosage and  
854 mislocalization of histone H3 and Cse4p lead to chromosome loss in *Saccharomyces*  
855 *cerevisiae*. *Genetics* **179**, 263-75 (2008).
- 856 42. Collins, K.A., Camahort, R., Seidel, C., Gerton, J.L. & Biggins, S. The overexpression of  
857 a *Saccharomyces cerevisiae* centromeric histone H3 variant mutant protein leads to a  
858 defect in kinetochore biorientation. *Genetics* **175**, 513-25 (2007).
- 859 43. Mata, J.F., Lopes, T., Gardner, R. & Jansen, L.E. A rapid FACS-based strategy to isolate  
860 human gene knockin and knockout clones. *PLoS one* **7**, e32646 (2012).
- 861 44. Conde e Silva, N. *et al.* CENP-A-containing nucleosomes: easier disassembly versus  
862 exclusive centromeric localization. *Journal of molecular biology* **370**, 555-73 (2007).
- 863 45. Miga, K.H. *et al.* Centromere reference models for human chromosomes X and Y satellite  
864 arrays. *Genome research* **24**, 697-707 (2014).

- 865 46. Miga, K.H. *et al.* Centromeric reference models for the 22 human autosomes.  
866 (unpublished data).
- 867 47. Schneider, V.A. *et al.* Evaluation of GRCh38 and de novo haploid genome assemblies  
868 demonstrates the enduring quality of the reference assembly. *Genome Res* **27**, 849-864  
869 (2017).
- 870 48. Levy, S. *et al.* The diploid genome sequence of an individual human. *PLoS biology* **5**,  
871 e254 (2007).
- 872 49. Zhang, Y. *et al.* Model-based analysis of ChIP-Seq (MACS). *Genome biology* **9**, R137  
873 (2008).
- 874 50. Zang, C. *et al.* A clustering approach for identification of enriched domains from histone  
875 modification ChIP-Seq data. *Bioinformatics* **25**, 1952-8 (2009).
- 876 51. Earnshaw, W.C. *et al.* Molecular cloning of cDNA for CENP-B, the major human  
877 centromere autoantigen. *J Cell Biol* **104**, 817-29 (1987).
- 878 52. Amor, D.J. & Choo, K.H. Neocentromeres: role in human disease, evolution, and  
879 centromere study. *American journal of human genetics* **71**, 695-714 (2002).
- 880 53. Amor, D.J. *et al.* Human centromere repositioning "in progress". *Proceedings of the*  
881 *National Academy of Sciences of the United States of America* **101**, 6542-7 (2004).
- 882 54. Hasson, D. *et al.* Formation of novel CENP-A domains on tandem repetitive DNA and  
883 across chromosome breakpoints on human chromosome 8q21 neocentromeres.  
884 *Chromosoma* **120**, 621-32 (2011).
- 885 55. Alonso, A. *et al.* Co-localization of CENP-C and CENP-H to discontinuous domains of  
886 CENP-A chromatin at human neocentromeres. *Genome biology* **8**, R148 (2007).
- 887 56. Hansen, R.S. *et al.* Sequencing newly replicated DNA reveals widespread plasticity in  
888 human replication timing. *Proc Natl Acad Sci U S A* **107**, 139-44 (2010).
- 889 57. Ryba, T., Battaglia, D., Pope, B.D., Hiratani, I. & Gilbert, D.M. Genome-scale analysis of  
890 replication timing: from bench to bioinformatics. *Nat Protoc* **6**, 870-95 (2011).
- 891 58. Hassan, K.M., Norwood, T., Gimelli, G., Gartler, S.M. & Hansen, R.S. Satellite 2  
892 methylation patterns in normal and ICF syndrome cells and association of  
893 hypomethylation with advanced replication. *Hum Genet* **109**, 452-62 (2001).
- 894 59. Bui, M. *et al.* Cell-cycle-dependent structural transitions in the human CENP-A  
895 nucleosome in vivo. *Cell* **150**, 317-26 (2012).
- 896 60. O'Keefe, R.T., Henderson, S.C. & Spector, D.L. Dynamic organization of DNA replication  
897 in mammalian cell nuclei: spatially and temporally defined replication of chromosome-  
898 specific alpha-satellite DNA sequences. *J Cell Biol* **116**, 1095-110 (1992).

- 899 61. Shelby, R.D., Monier, K. & Sullivan, K.F. Chromatin assembly at kinetochores is  
900 uncoupled from DNA replication. *J Cell Biol* **151**, 1113-8 (2000).
- 901 62. Ten Hagen, K.G., Gilbert, D.M., Willard, H.F. & Cohen, S.N. Replication timing of DNA  
902 sequences associated with human centromeres and telomeres. *Mol Cell Biol* **10**, 6348-  
903 55 (1990).
- 904 63. Erliandri, I. *et al.* Replication of alpha-satellite DNA arrays in endogenous human  
905 centromeric regions and in human artificial chromosome. *Nucleic Acids Res* **42**, 11502-  
906 16 (2014).
- 907 64. Nagpal, H. *et al.* Dynamic changes in CCAN organization through CENP-C during cell-  
908 cycle progression. *Mol Biol Cell* **26**, 3768-76 (2015).
- 909 65. Screpanti, E. *et al.* Direct binding of Cenp-C to the Mis12 complex joins the inner and  
910 outer kinetochore. *Curr Biol* **21**, 391-8 (2011).
- 911 66. Nishino, T. *et al.* CENP-T provides a structural platform for outer kinetochore assembly.  
912 *EMBO J* **32**, 424-36 (2013).
- 913 67. Guse, A., Carroll, C.W., Moree, B., Fuller, C.J. & Straight, A.F. In vitro centromere and  
914 kinetochore assembly on defined chromatin templates. *Nature* **477**, 354-8 (2011).
- 915 68. Carroll, C.W., Milks, K.J. & Straight, A.F. Dual recognition of CENP-A nucleosomes is  
916 required for centromere assembly. *J Cell Biol* **189**, 1143-55 (2010).
- 917 69. Petrovic, A. *et al.* Structure of the MIS12 Complex and Molecular Basis of Its Interaction  
918 with CENP-C at Human Kinetochores. *Cell* **167**, 1028-1040 e15 (2016).
- 919 70. Rago, F., Gascoigne, K.E. & Cheeseman, I.M. Distinct organization and regulation of the  
920 outer kinetochore KMN network downstream of CENP-C and CENP-T. *Curr Biol* **25**, 671-  
921 7 (2015).
- 922 71. Shono, N. *et al.* CENP-C and CENP-I are key connecting factors for kinetochore and  
923 CENP-A assembly. *J Cell Sci* **128**, 4572-87 (2015).
- 924 72. Klare, K. *et al.* CENP-C is a blueprint for constitutive centromere-associated network  
925 assembly within human kinetochores. *J Cell Biol* **210**, 11-22 (2015).
- 926 73. Kato, H. *et al.* A conserved mechanism for centromeric nucleosome recognition by  
927 centromere protein CENP-C. *Science* **340**, 1110-3 (2013).
- 928 74. McKinley, K.L. *et al.* The CENP-L-N Complex Forms a Critical Node in an Integrated  
929 Meshwork of Interactions at the Centromere-Kinetochore Interface. *Mol Cell* **60**, 886-98  
930 (2015).
- 931 75. Weir, J.R. *et al.* Insights from biochemical reconstitution into the architecture of human  
932 kinetochores. *Nature* **537**, 249-253 (2016).



- 933 76. Hoffmann, S. *et al.* CENP-A Is Dispensable for Mitotic Centromere Function after Initial  
934 Centromere/Kinetochore Assembly. *Cell Rep* **17**, 2394-2404 (2016).
- 935 77. Smith, S. & Stillman, B. Stepwise assembly of chromatin during DNA replication in vitro.  
936 *EMBO J* **10**, 971-80 (1991).
- 937 78. Krude, T. Chromatin assembly during DNA replication in somatic cells. *Eur J Biochem*  
938 **263**, 1-5 (1999).
- 939 79. Verreault, A., Kaufman, P.D., Kobayashi, R. & Stillman, B. Nucleosome assembly by a  
940 complex of CAF-1 and acetylated histones H3/H4. *Cell* **87**, 95-104 (1996).
- 941 80. Shang, W.H. *et al.* Acetylation of histone H4 lysine 5 and 12 is required for CENP-A  
942 deposition into centromeres. *Nat Commun* **7**, 13465 (2016).
- 943 81. Hayashi, T. *et al.* Mis16 and Mis18 are required for CENP-A loading and histone  
944 deacetylation at centromeres. *Cell* **118**, 715-29 (2004).
- 945 82. Kaufman, P.D., Kobayashi, R., Kessler, N. & Stillman, B. The p150 and p60 subunits of  
946 chromatin assembly factor I: a molecular link between newly synthesized histones and  
947 DNA replication. *Cell* **81**, 1105-14 (1995).
- 948 83. Huang, H. *et al.* A unique binding mode enables MCM2 to chaperone histones H3-H4 at  
949 replication forks. *Nat Struct Mol Biol* **22**, 618-26 (2015).
- 950 84. Gascoigne, K.E. *et al.* Induced ectopic kinetochore assembly bypasses the requirement  
951 for CENP-A nucleosomes. *Cell* **145**, 410-22 (2011).
- 952 85. Zhang, W. *et al.* Centromere and kinetochore gene misexpression predicts cancer  
953 patient survival and response to radiotherapy and chemotherapy. *Nature*  
954 *communications* **7**, 12619 (2016).
- 955 86. Sun, X. *et al.* Elevated expression of the centromere protein-A(CENP-A)-encoding gene  
956 as a prognostic and predictive biomarker in human cancers. *Int J Cancer* **139**, 899-907  
957 (2016).
- 958 87. Heiman, M. *et al.* A translational profiling approach for the molecular characterization of  
959 CNS cell types. *Cell* **135**, 738-48 (2008).
- 960 88. Zhang, J., Kobert, K., Flouri, T. & Stamatakis, A. PEAR: a fast and accurate Illumina  
961 Paired-End reAd mergeR. *Bioinformatics* **30**, 614-20 (2014).
- 962 89. Li, H. & Durbin, R. Fast and accurate long-read alignment with Burrows-Wheeler  
963 transform. *Bioinformatics* **26**, 589-95 (2010).
- 964 90. Li, H. Aligning sequence reads, clone sequences and assembly contigs with BWA-MEM.  
965 *eprint arXiv* (2013).
- 966 91. Quinlan, A.R. & Hall, I.M. BEDTools: a flexible suite of utilities for comparing genomic  
967 features. *Bioinformatics* **26**, 841-2 (2010).

- 968 92. Karolchik, D. *et al.* The UCSC Table Browser data retrieval tool. *Nucleic acids research*  
969 **32**, D493-6 (2004).
- 970 93. Rosenbloom, K.R. *et al.* The UCSC Genome Browser database: 2015 update. *Nucleic*  
971 *acids research* **43**, D670-81 (2015).
- 972 94. McDonald, W.H. *et al.* MS1, MS2, and SQT-three unified, compact, and easily parsed  
973 file formats for the storage of shotgun proteomic spectra and identifications. *Rapid*  
974 *Commun Mass Spectrom* **18**, 2162-8 (2004).
- 975 95. Xu, T. *et al.* ProLuCID: An improved SEQUEST-like algorithm with enhanced sensitivity  
976 and specificity. *J Proteomics* **129**, 16-24 (2015).
- 977 96. Peng, J., Elias, J.E., Thoreen, C.C., Licklider, L.J. & Gygi, S.P. Evaluation of  
978 multidimensional chromatography coupled with tandem mass spectrometry (LC/LC-  
979 MS/MS) for large-scale protein analysis: the yeast proteome. *J Proteome Res* **2**, 43-50  
980 (2003).
- 981 97. Tabb, D.L., McDonald, W.H. & Yates, J.R., 3rd. DTASelect and Contrast: tools for  
982 assembling and comparing protein identifications from shotgun proteomics. *J Proteome*  
983 *Res* **1**, 21-6 (2002).  
984

**a** CENP-A ChIP-seq workflow:

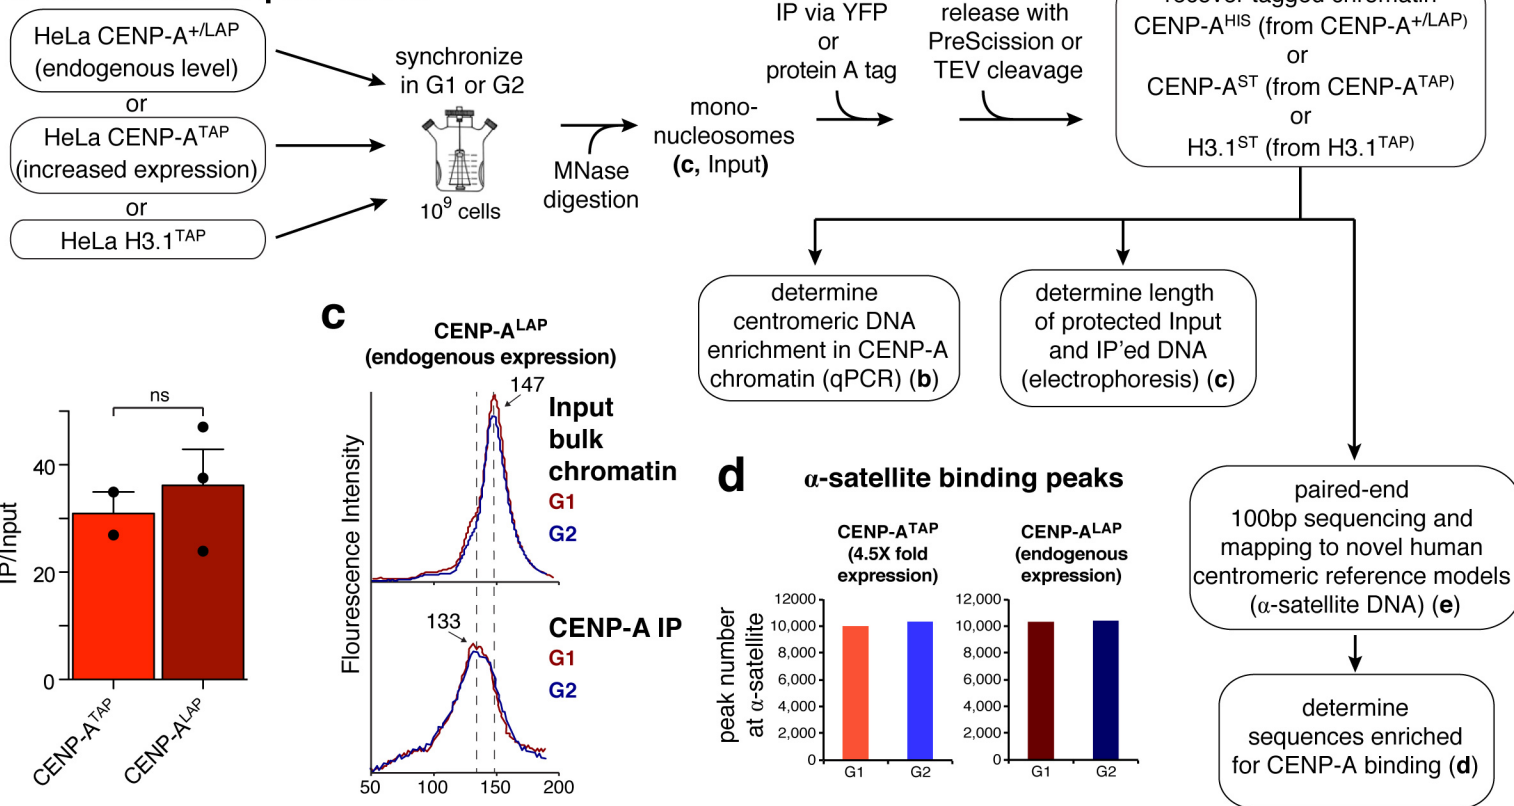

**b**

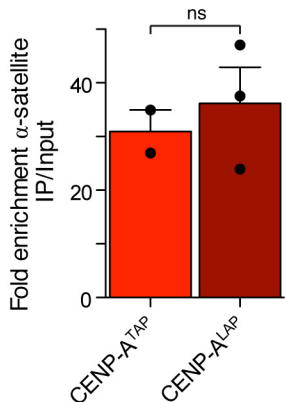

**c**

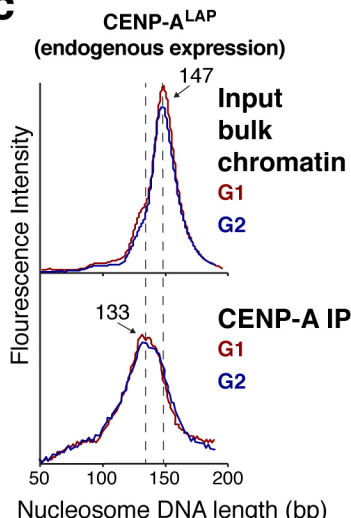

**d**

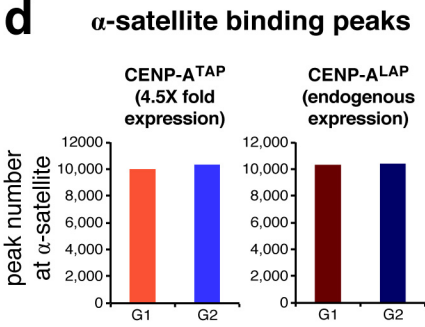

**e**

centromere reference model 18: 15,259,944-21,295,023

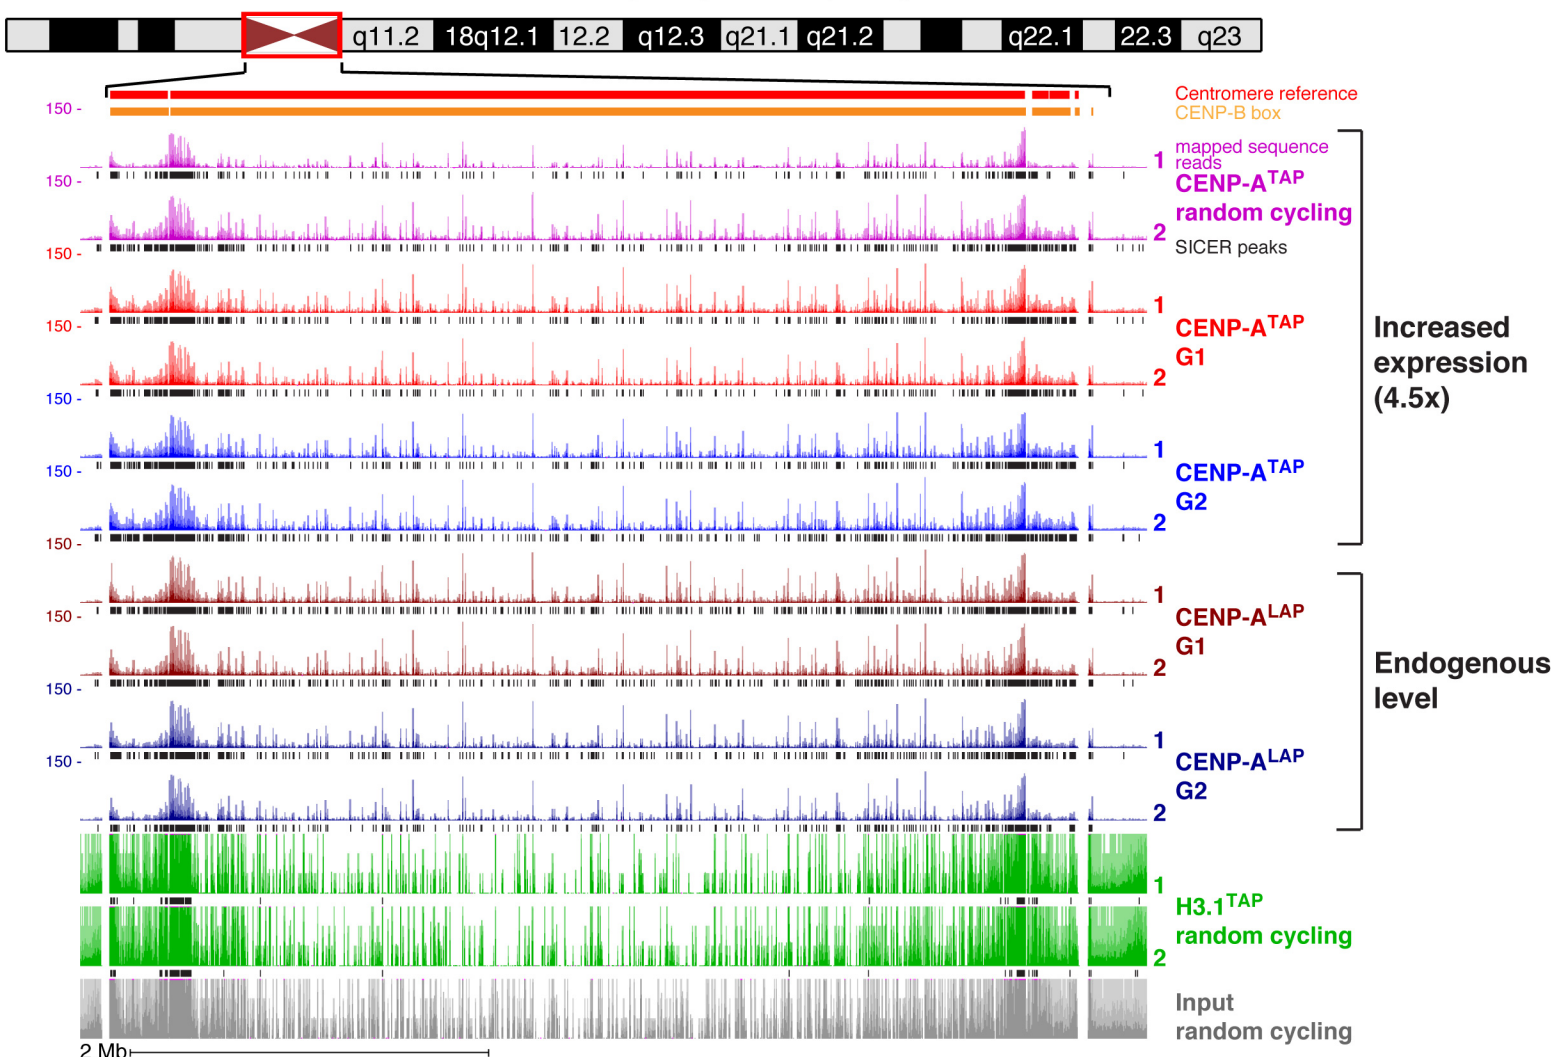

Fig 1. CENP-A ChIP-seq identifies CENP-A binding at reference centromeres of 23 human chromosomes



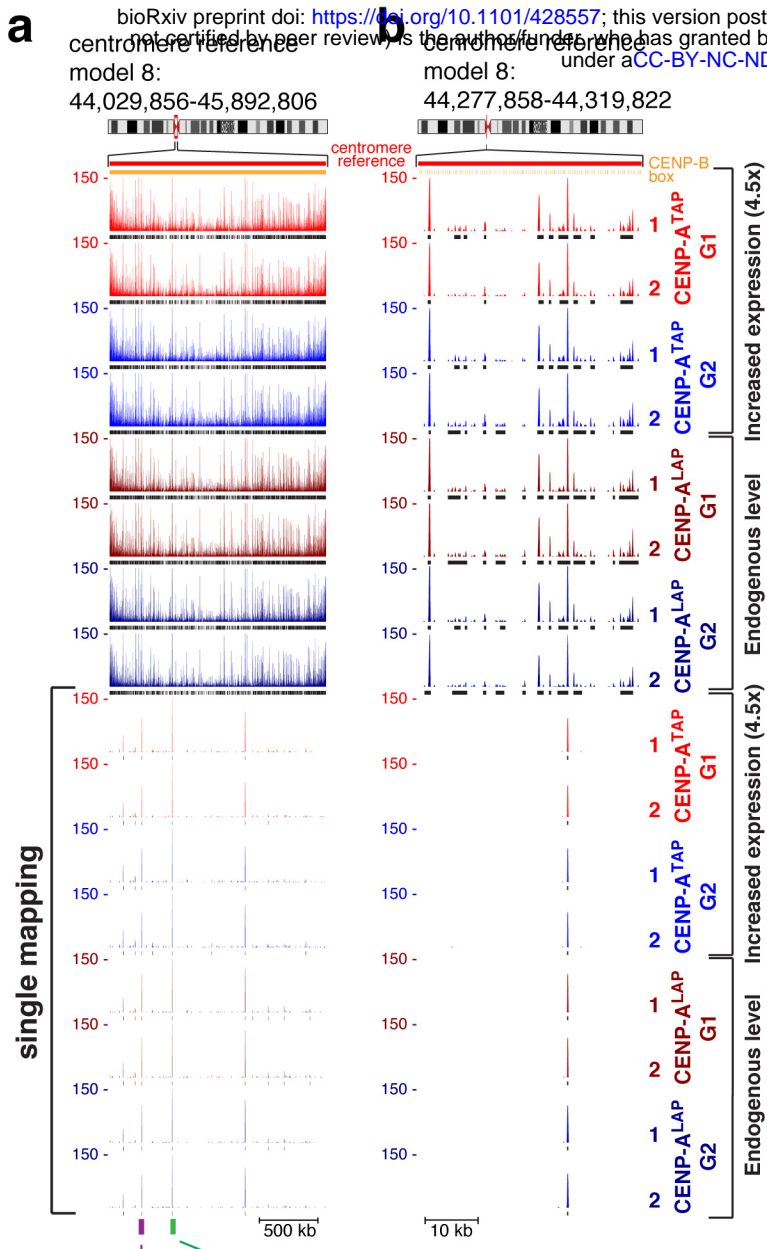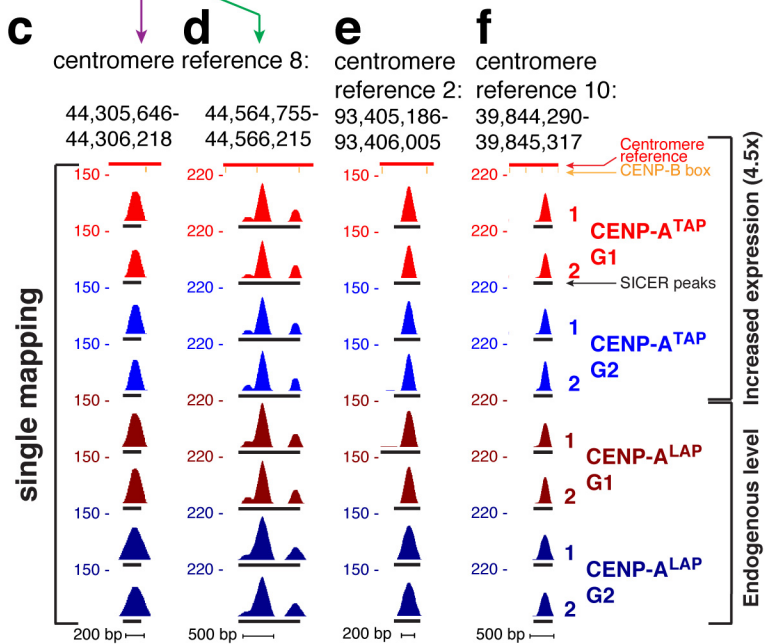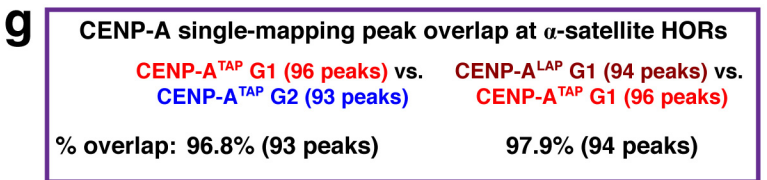

Figure 2. Retention of centromeric CENP-A through DNA replication

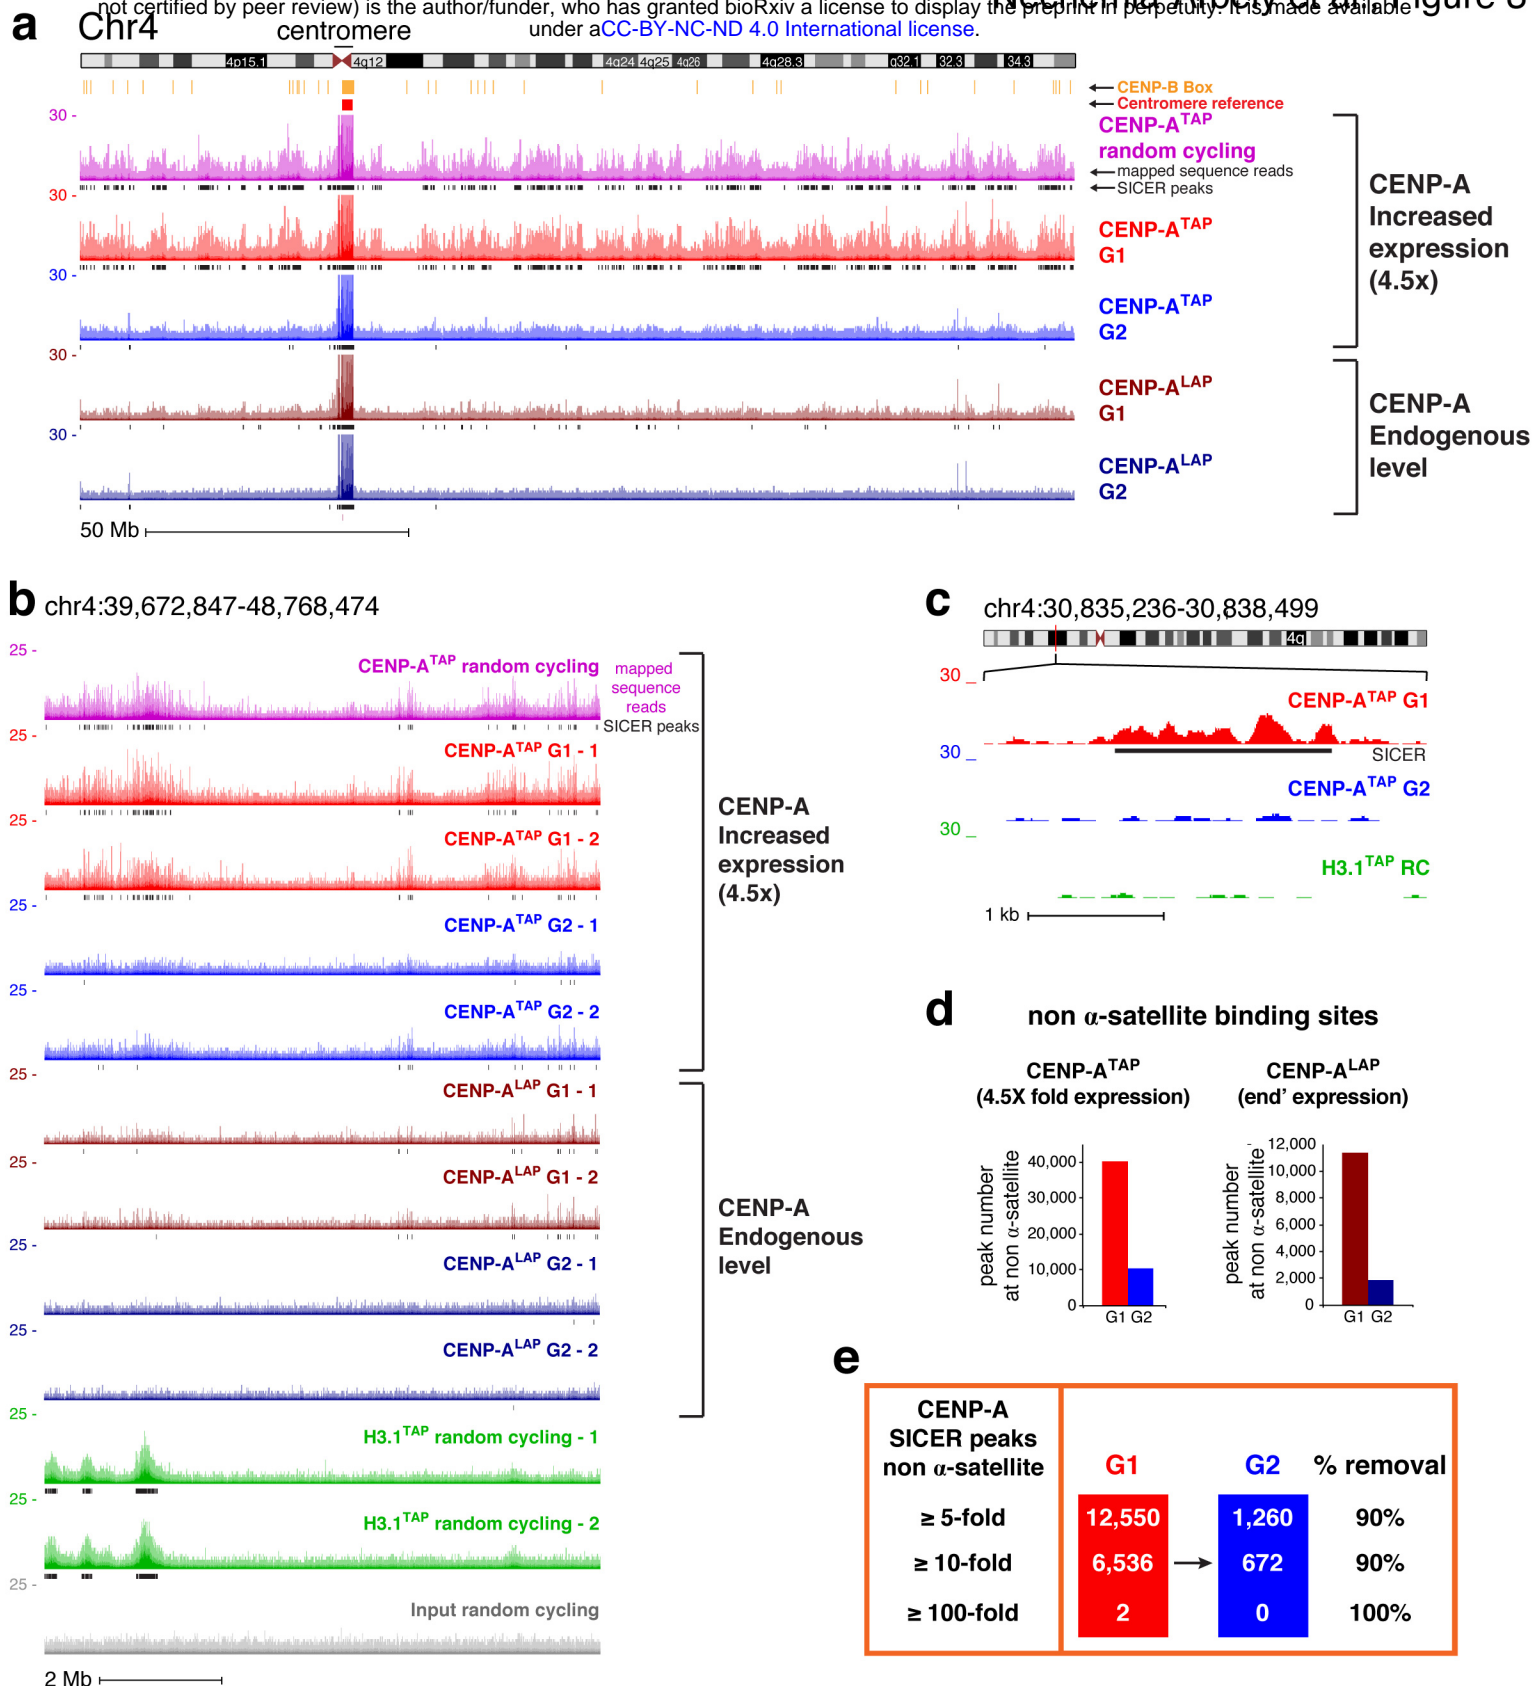

Figure 3. Sites of CENP-A assembly onto chromosome arms in early G1 are removed by G2

Nechemia-Arbely et al., Figure 4

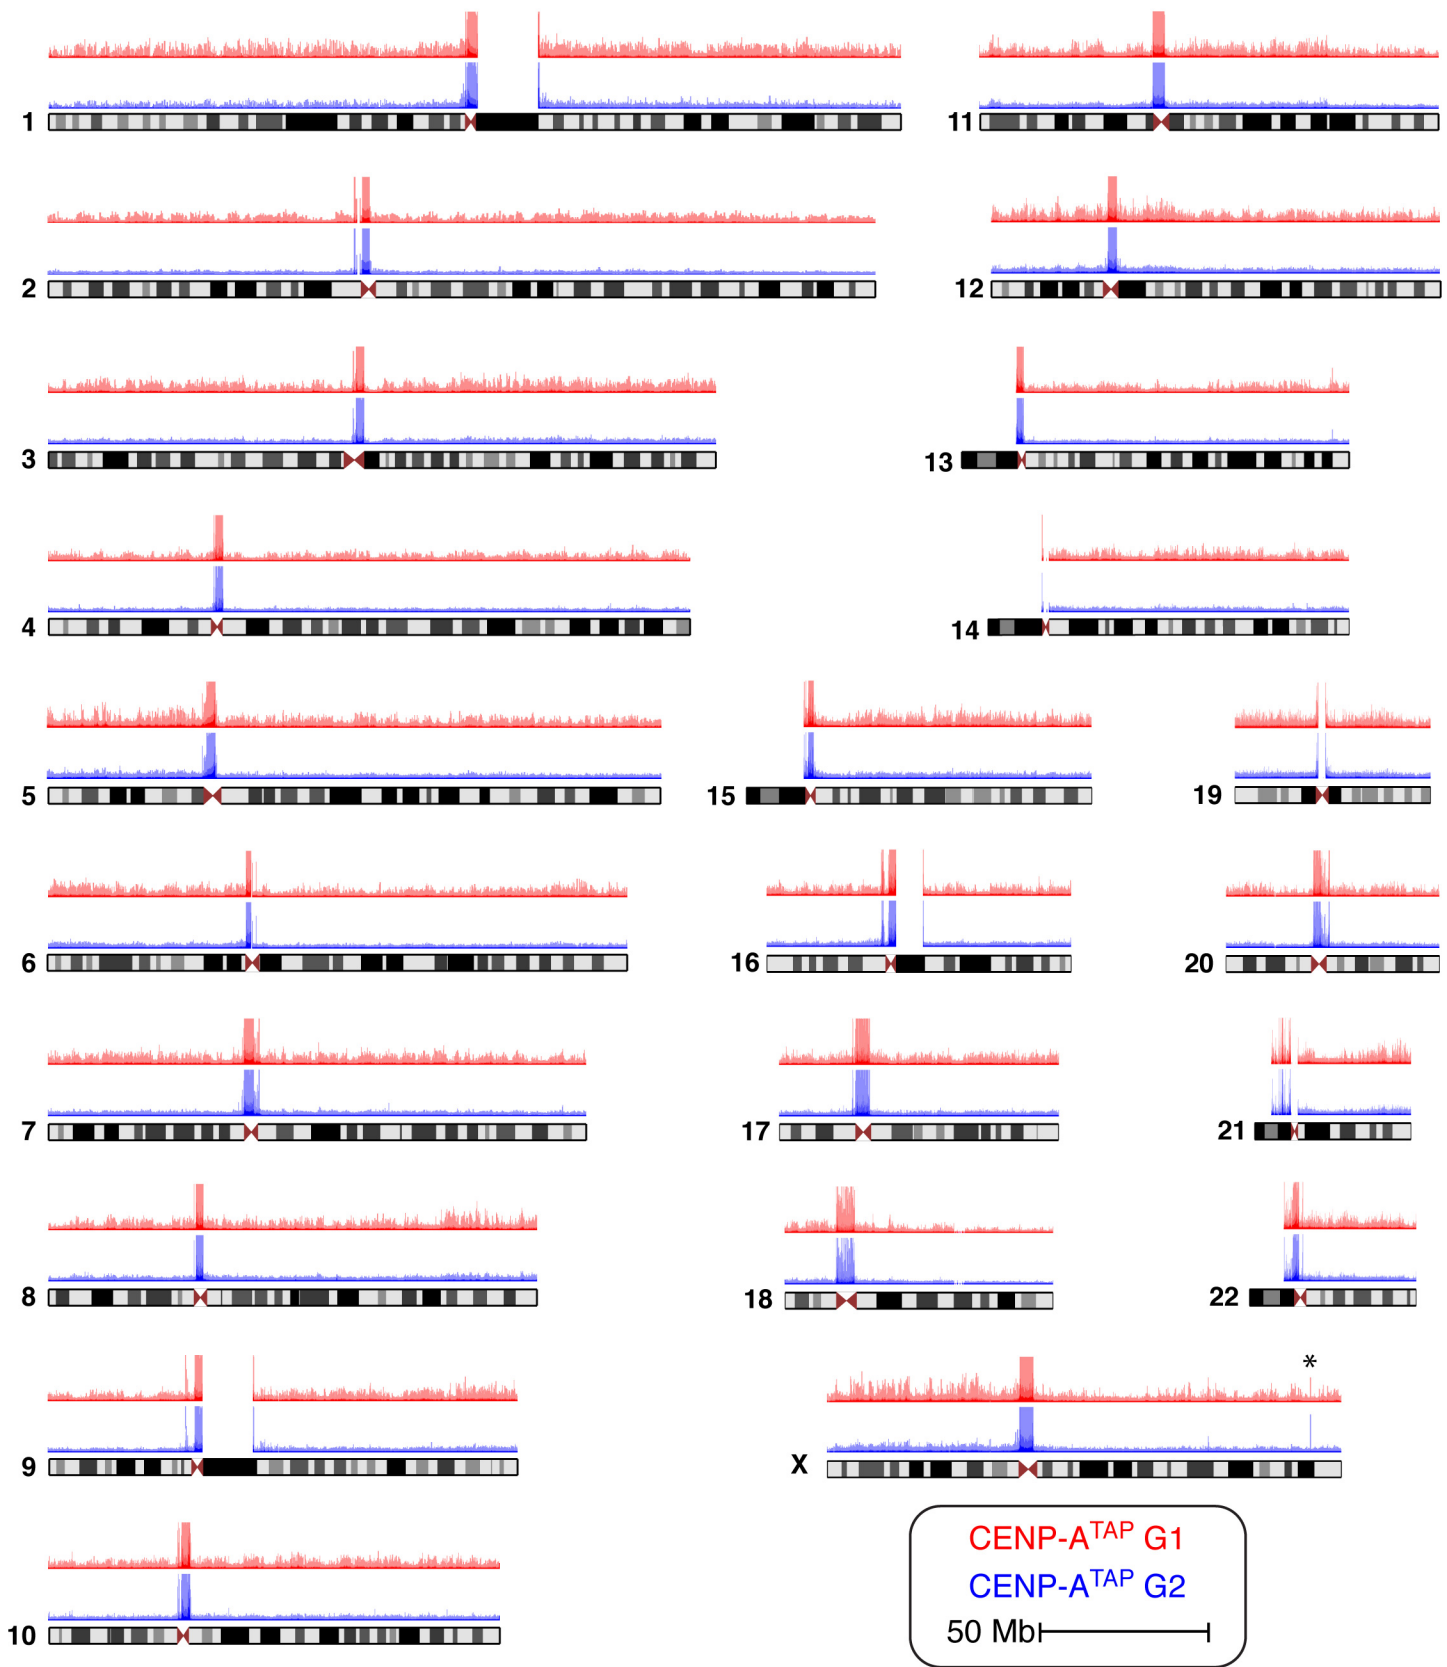

Fig. 4. Ectopic CENP-A is removed following DNA replication from the arms of all 23 human chromosomes.

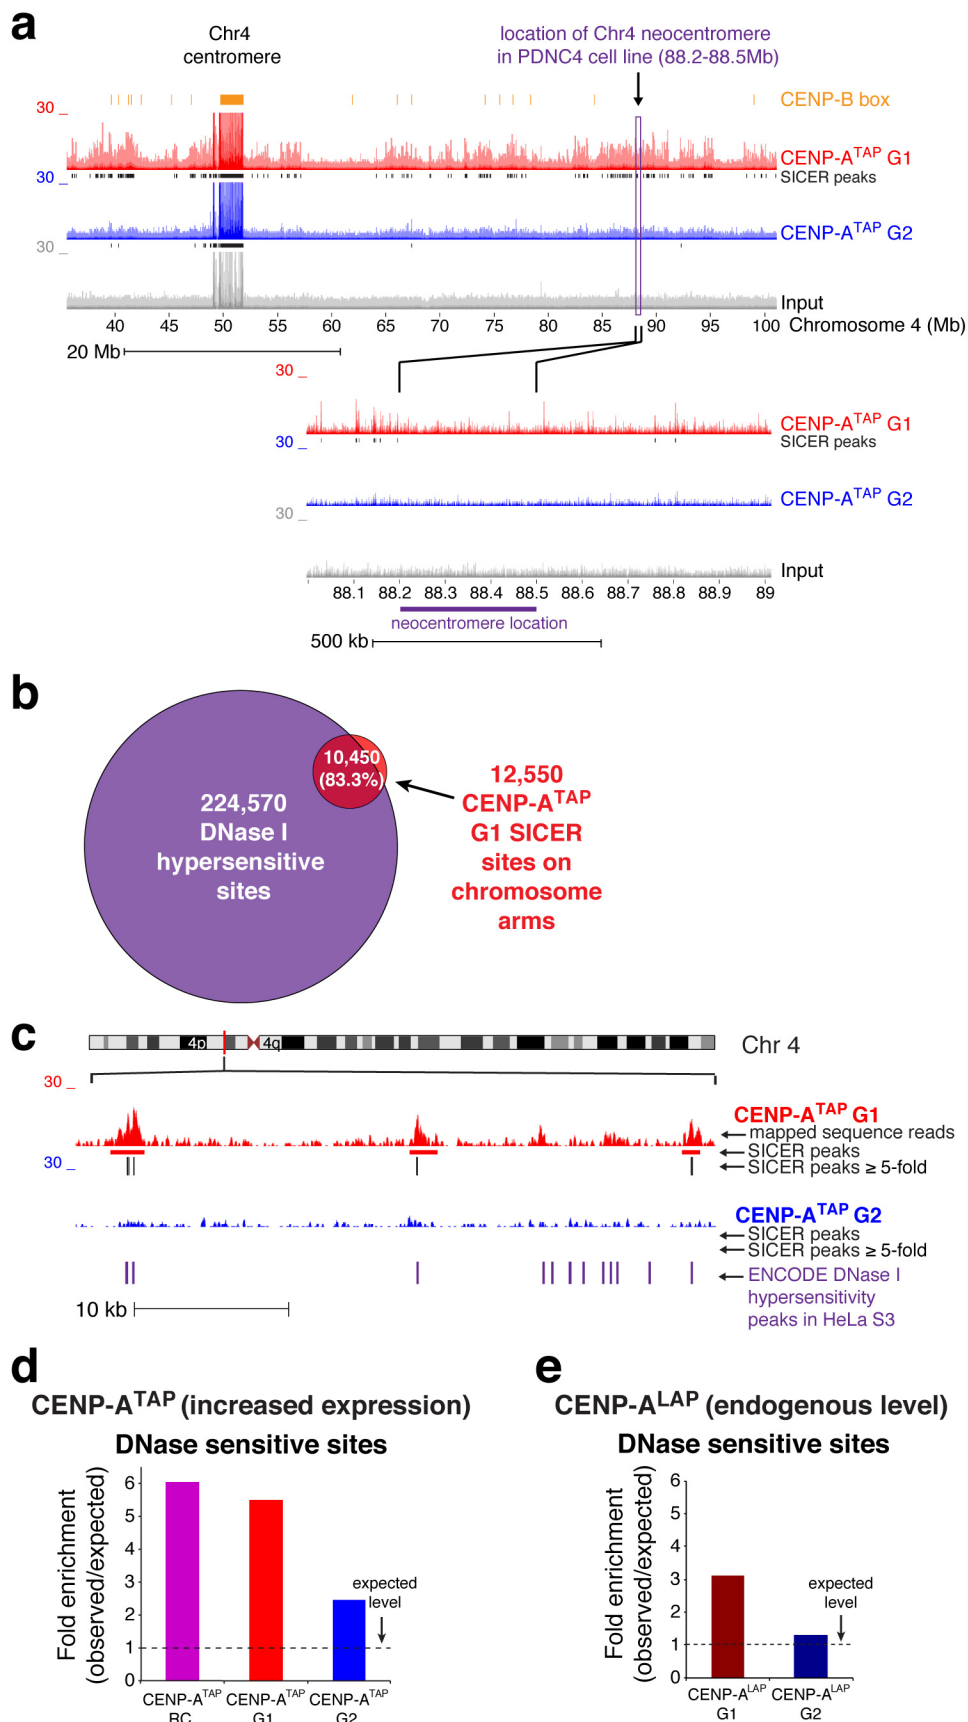

Fig 5. Sites of deposition of CENP-A on chromosome arms are not seeding hotspots for neocentromere formation.



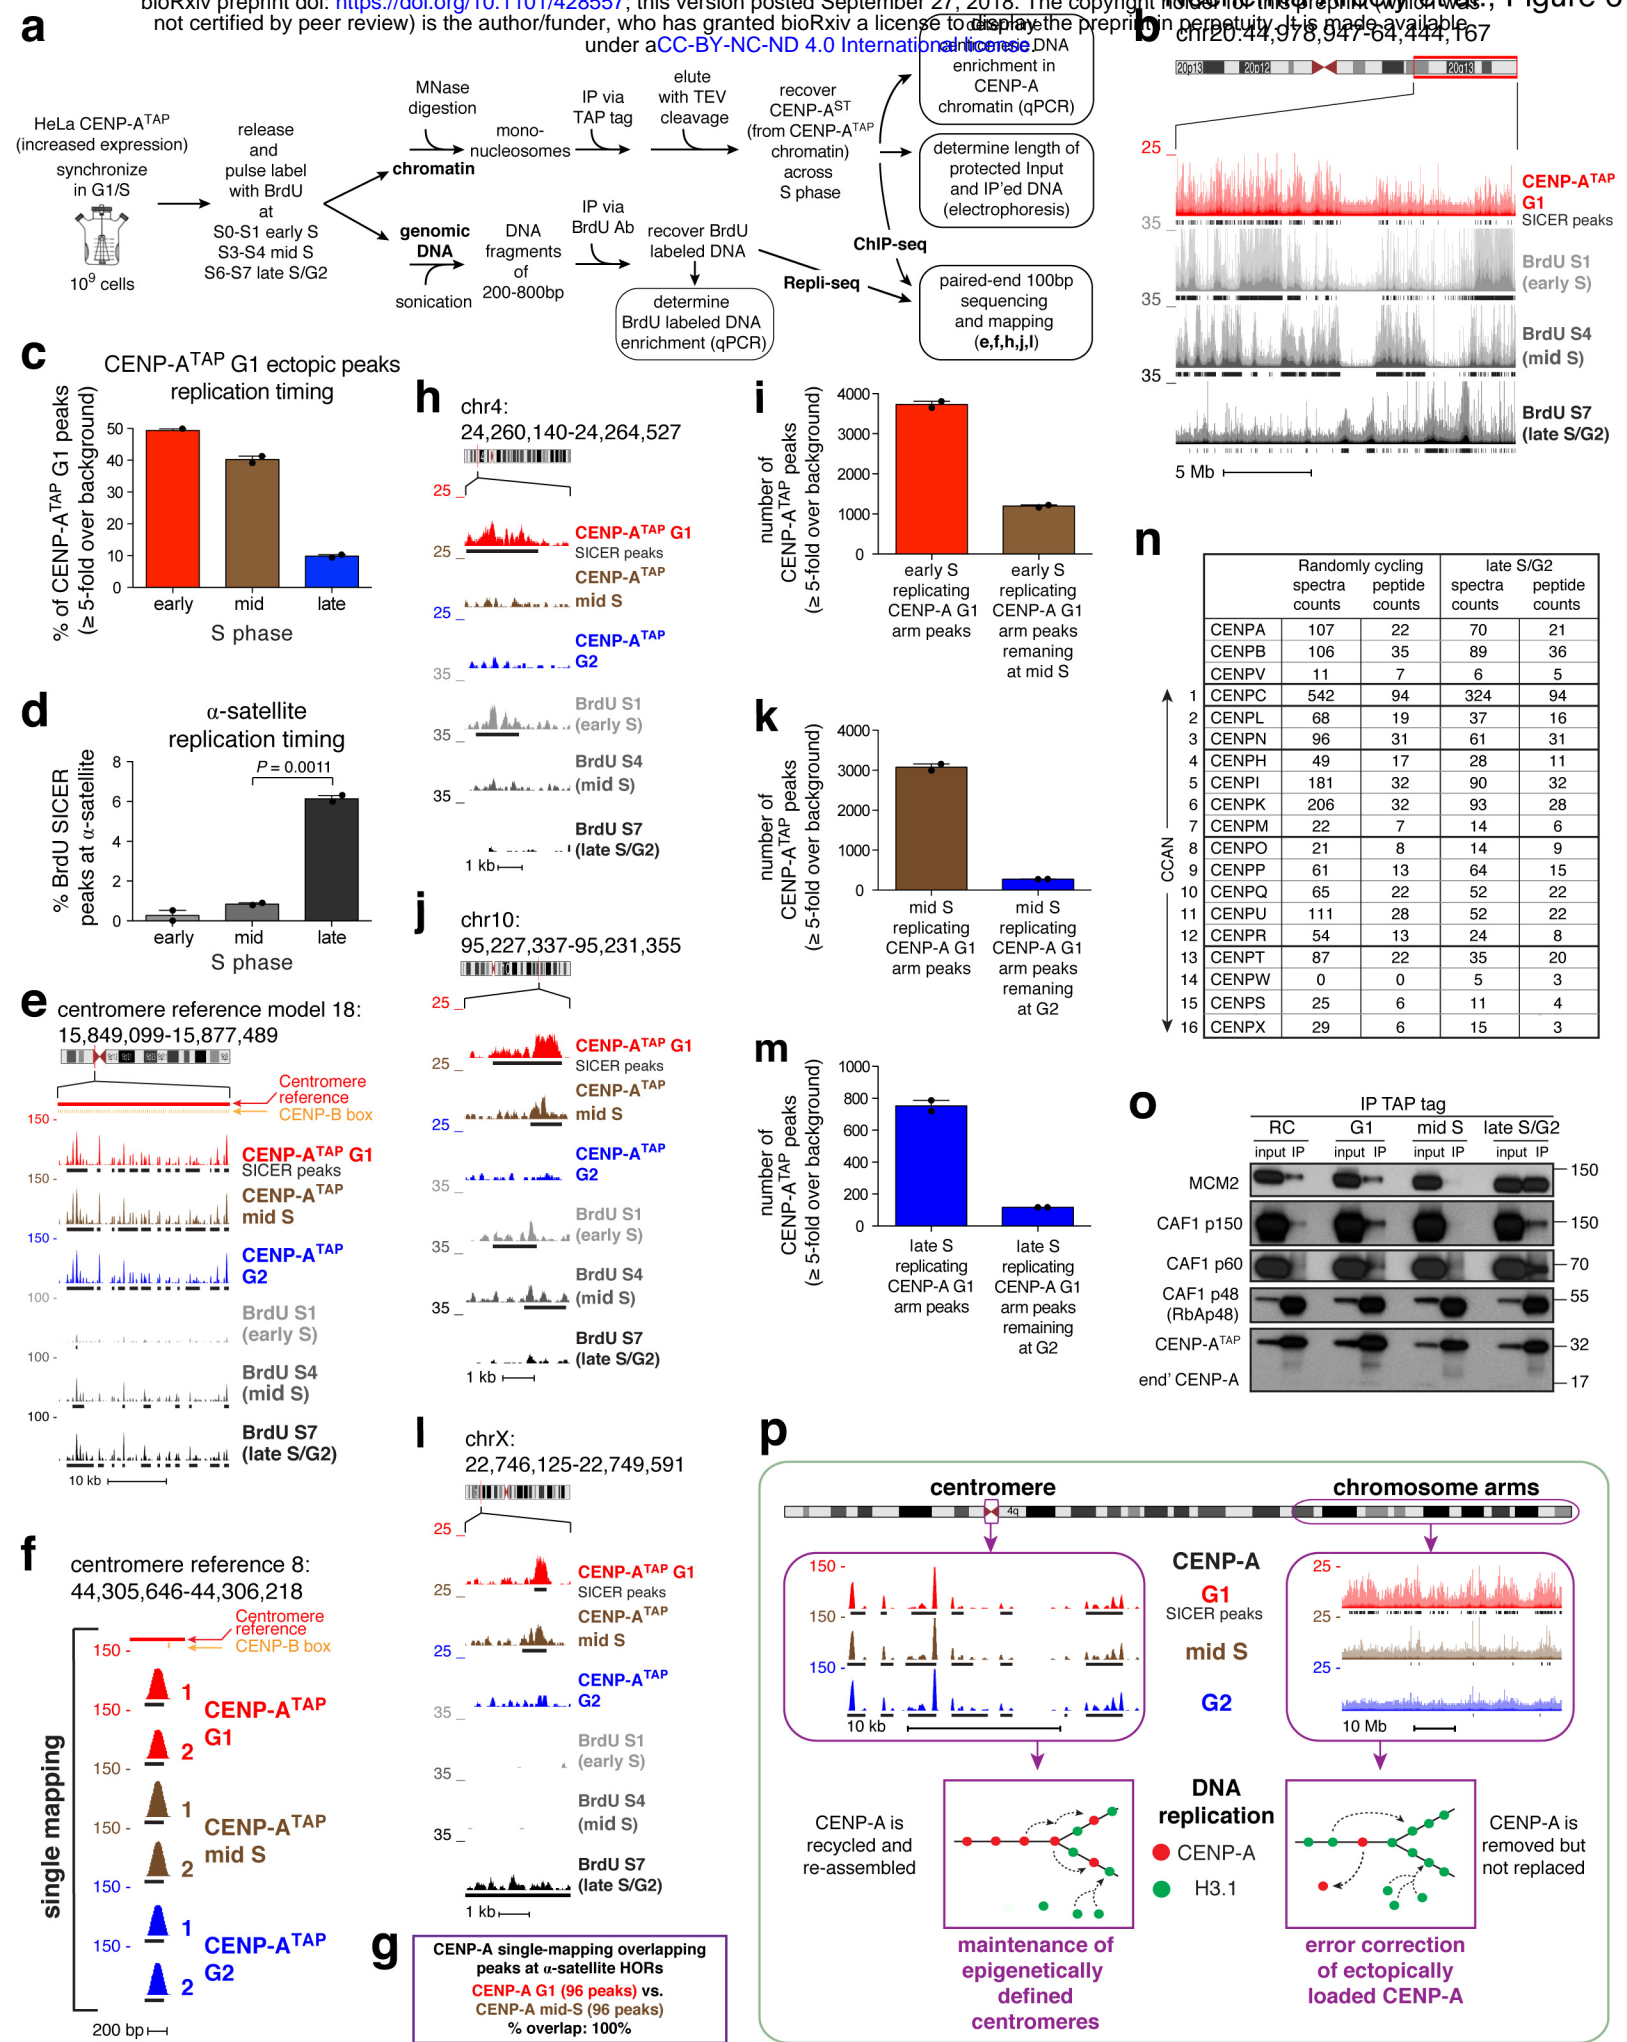

Figure 6. Ectopic CENP-A is removed contemporaneously with replication fork progression, while centromeric CENP-A is retained

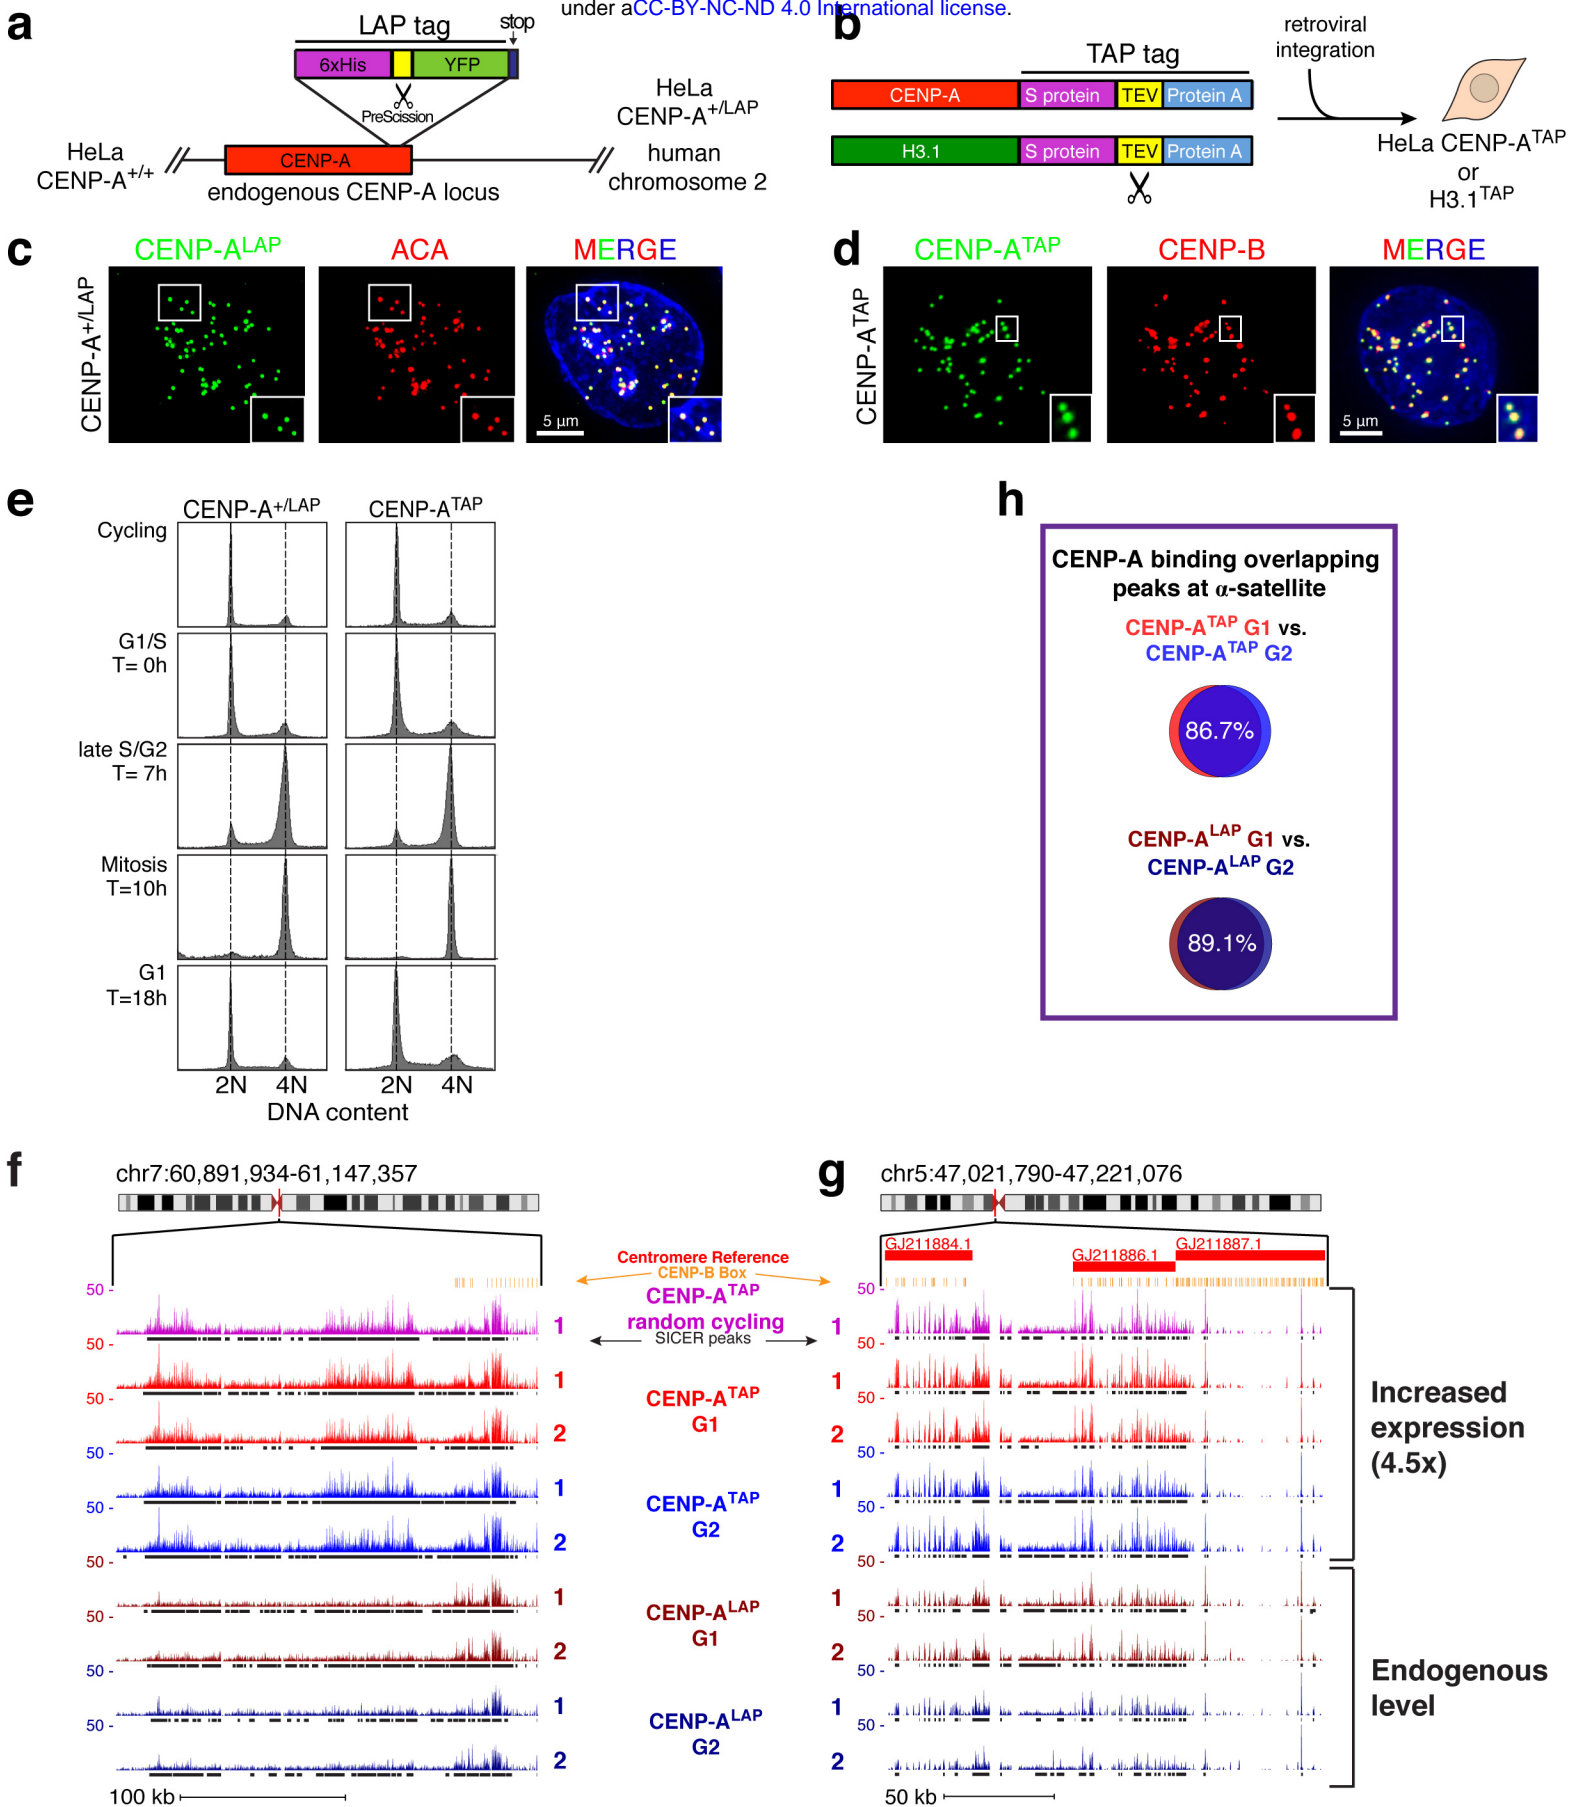

Fig S1. Identification of peaks enriched for CENP-A binding.

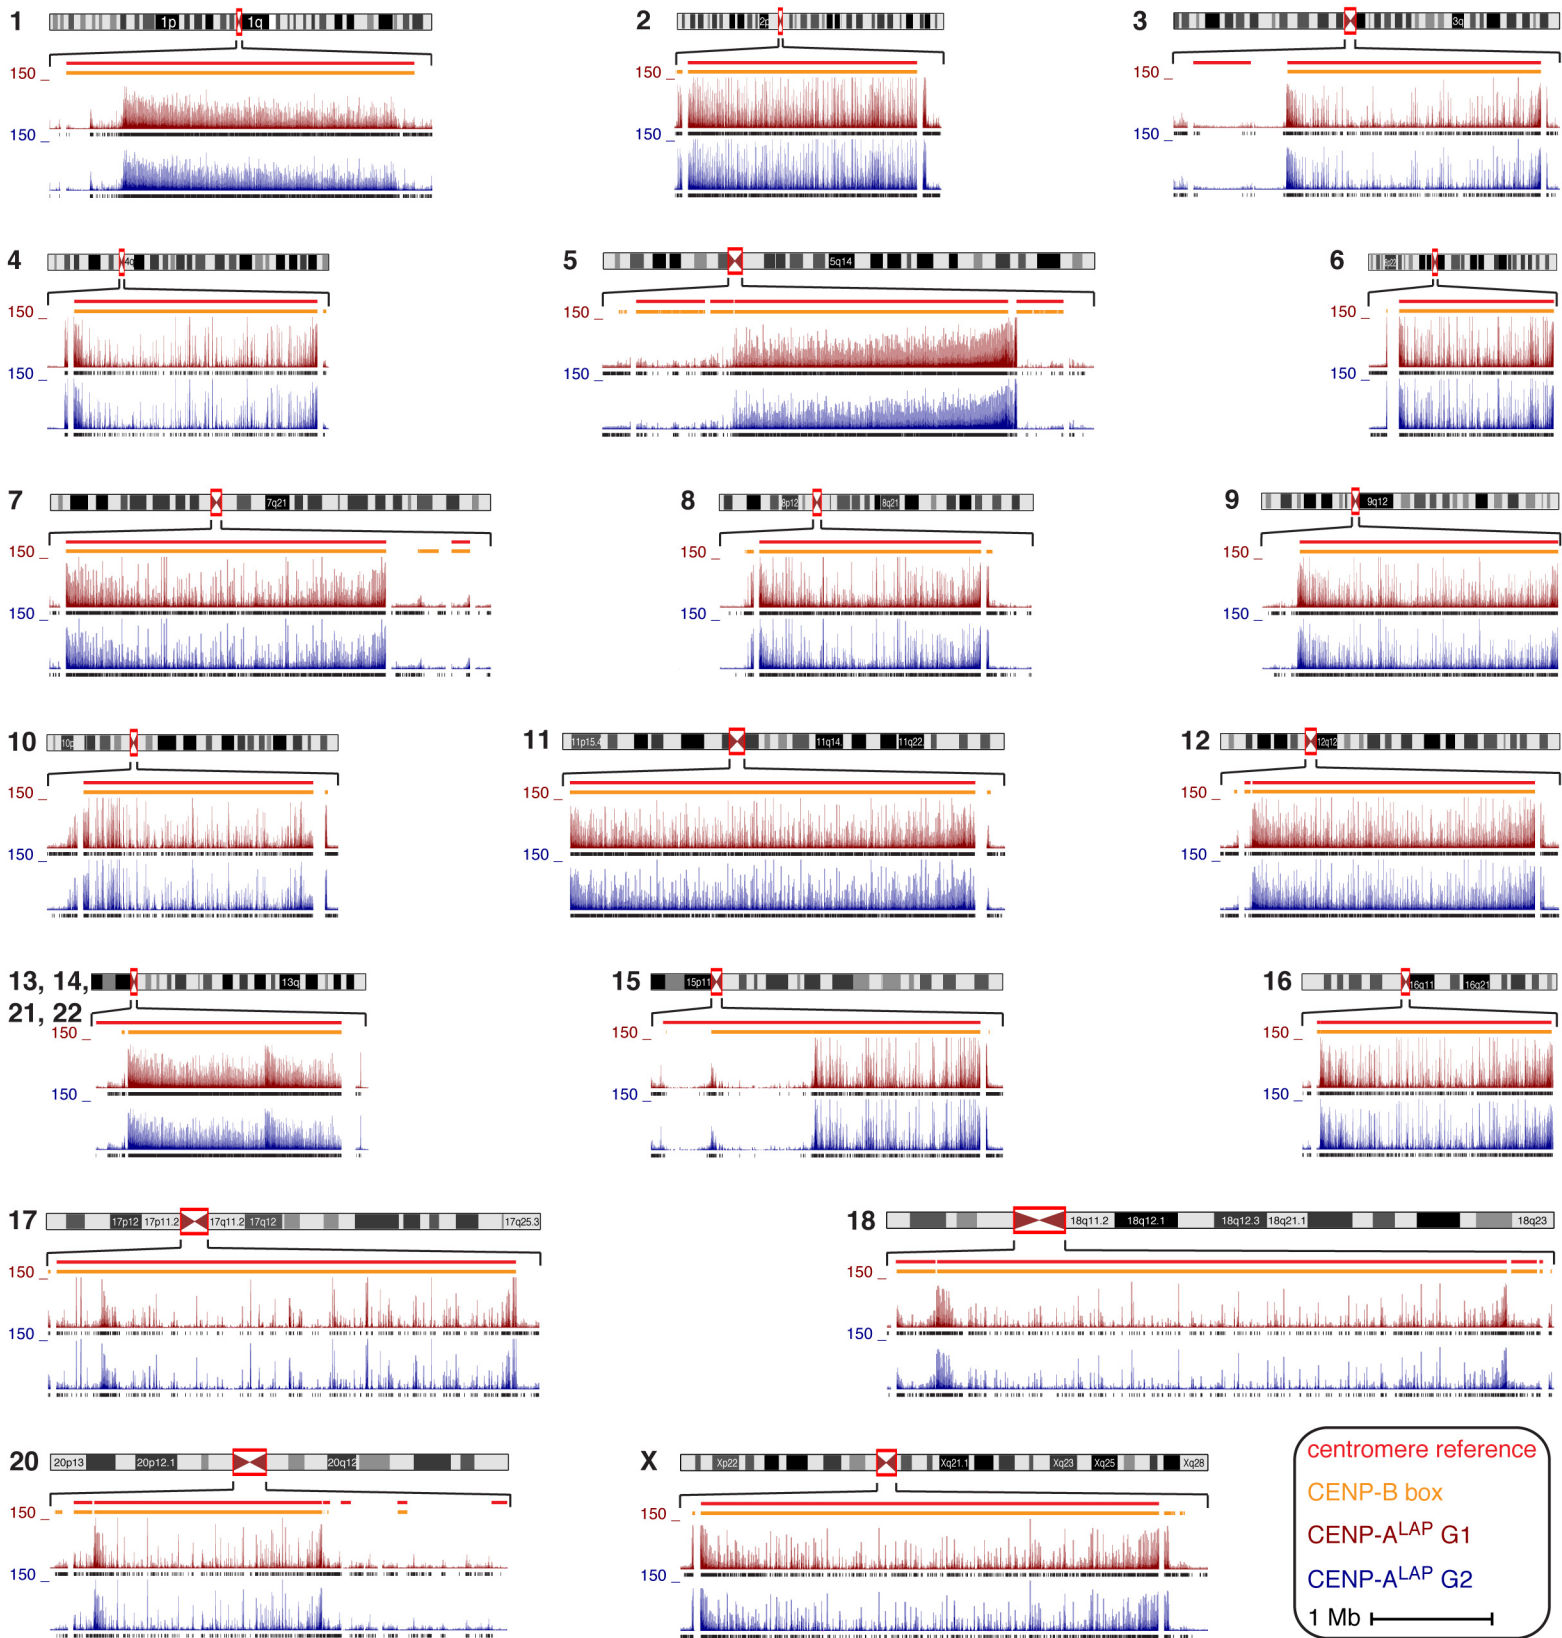

Supplementary Figure S2. CENP-A ChIP-seq identifies CENP-A binding at reference centromeres of 23 human chromosomes



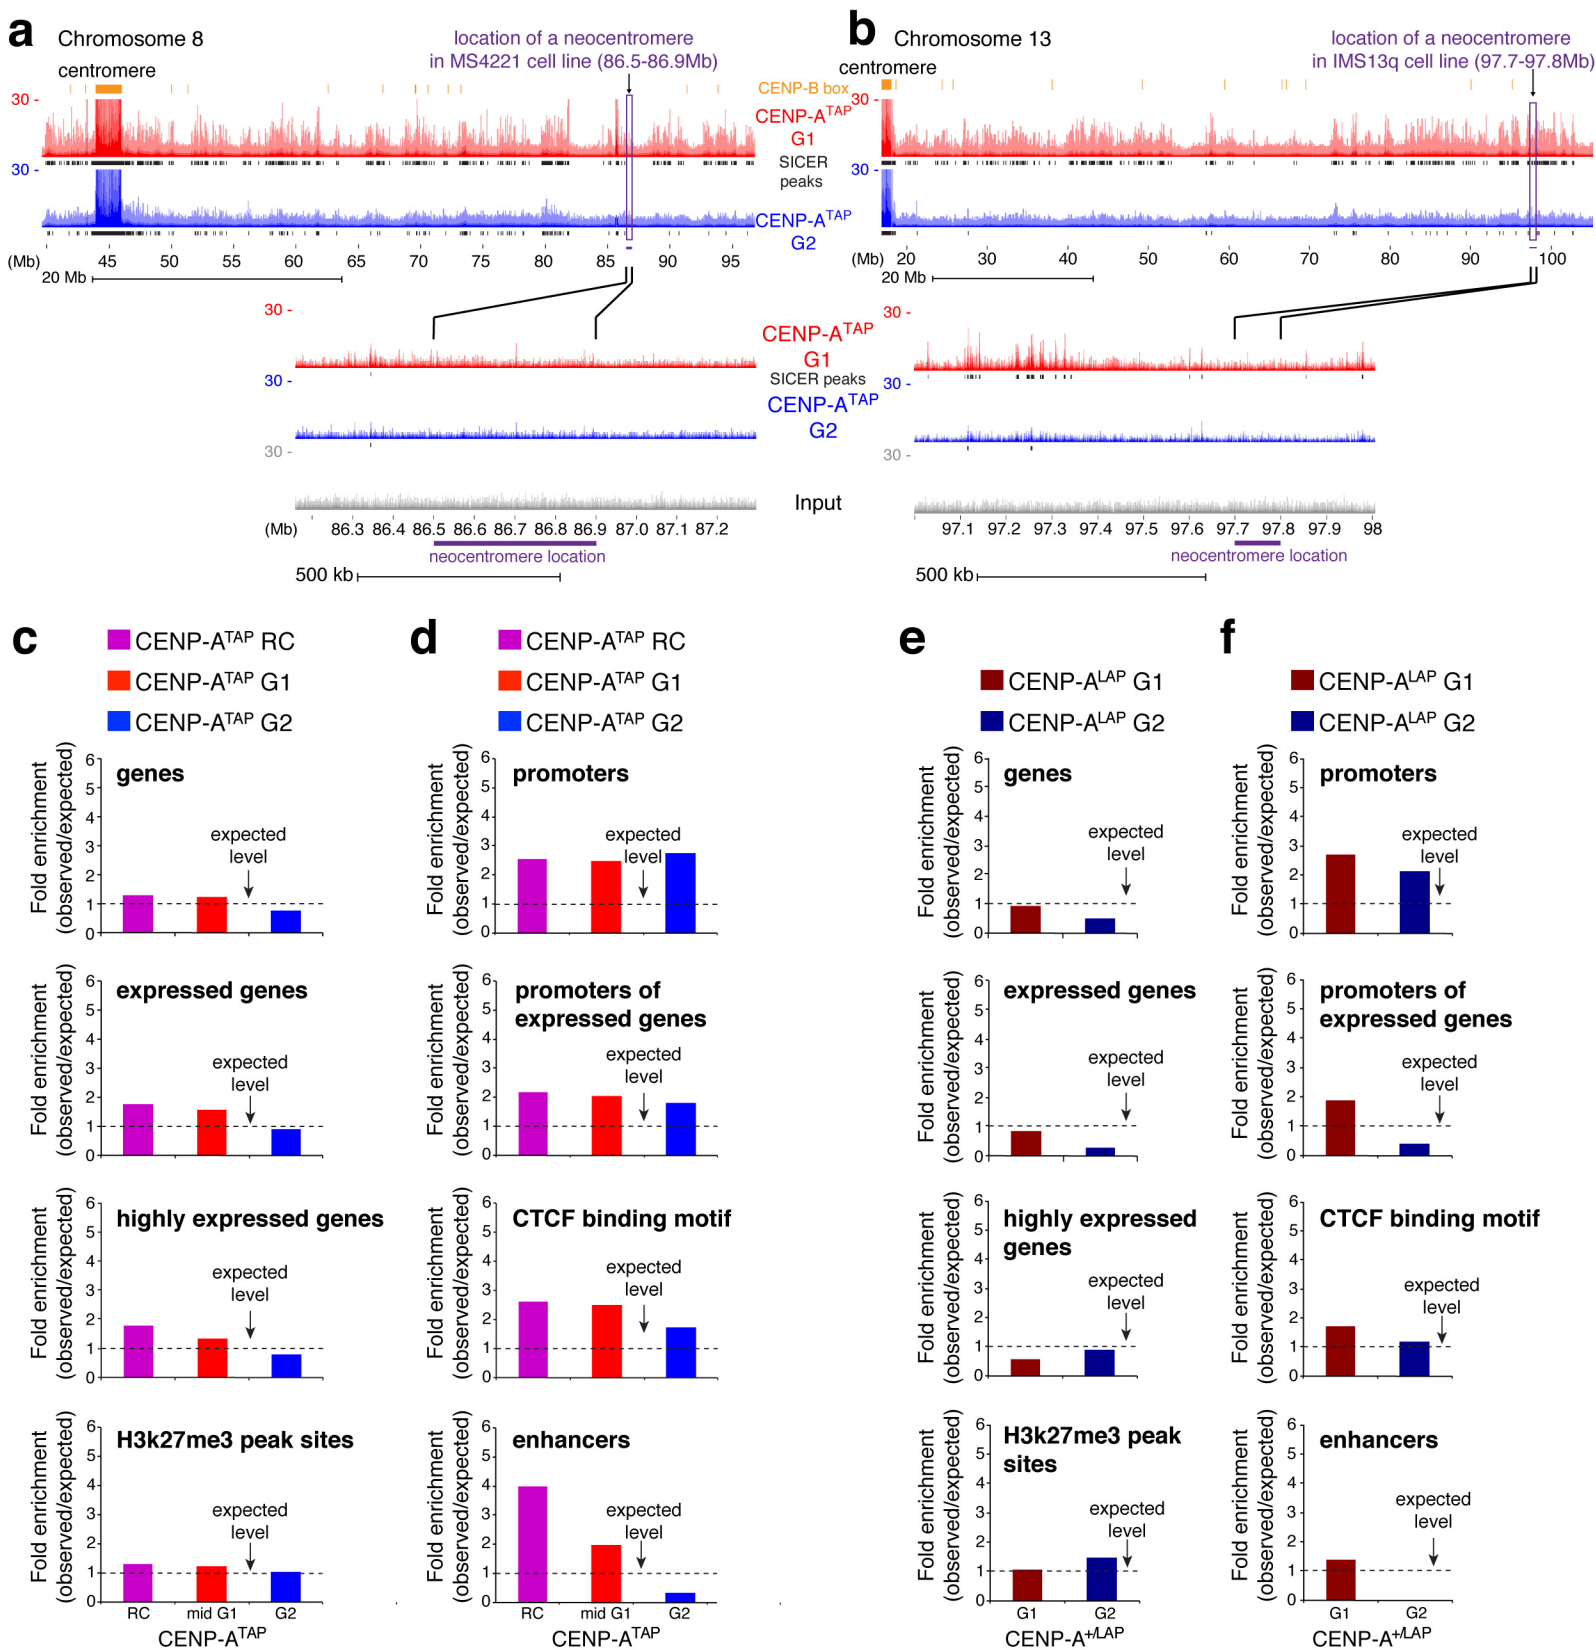

Supplementary Fig S3. Ectopic deposition of CENP-A into open and active chromatin at G1 does not function as a seeding hotspot for neocentromere formation



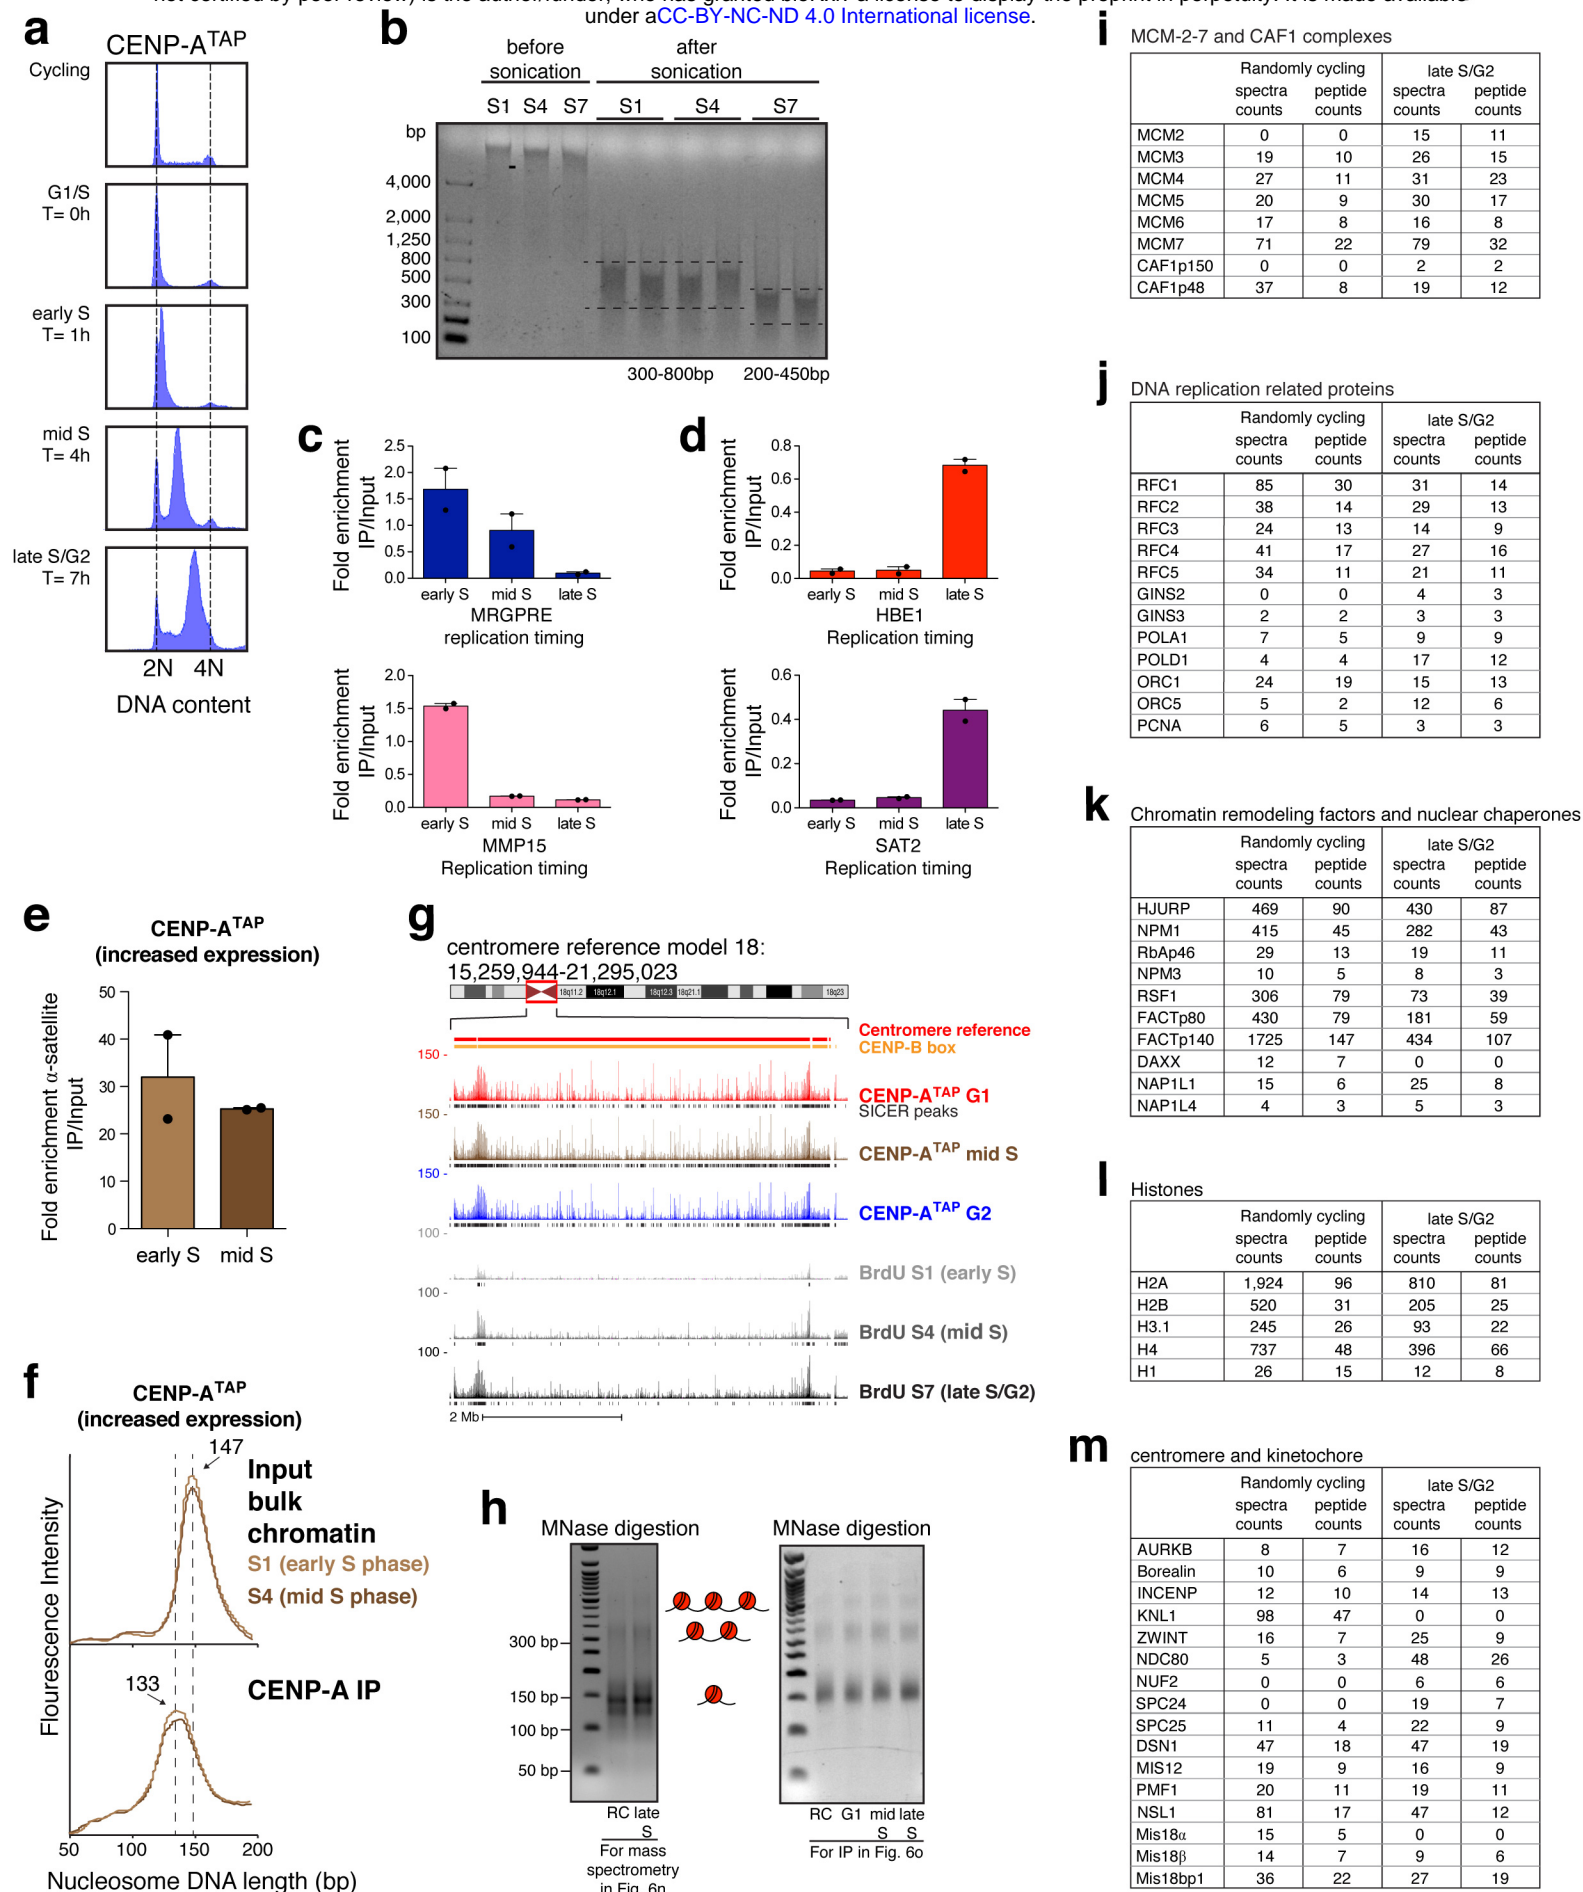

**Supplementary Table S1. Read statistics for ChIP-seq and Repli-seq experiments.**

Total number of merged paired-end read (one read per merged two paired-ends) generated for each sample in dataset, the number (and percentage) of those that were  $\geq 100$ bp in length and the number (and percentage) of reads mapping to  $\alpha$ -satellites. **Table A, B.** Read statistics for each sample in the CENP-A<sup>+LAP</sup> dataset (A) and for the combined replicates in the CENP-A<sup>+LAP</sup> dataset (D) in each condition. **Table C, D.** Read statistics for each sample in the CENP-A<sup>TAP</sup> dataset (C) and for the combined replicates in the CENP-A<sup>TAP</sup> dataset (D) in each condition. **Table E, F.** Read statistics for each sample in the BrdU Repli-seq dataset (E) and for the combined replicates in the BrdU Repli-seq dataset (F) in each condition.

| <b>Table A. ChIP-seq replicates statistics for CENP-A<sup>+LAP</sup> chromatin</b> |                             |                                                                         |                                                                         |                                                                                 |
|------------------------------------------------------------------------------------|-----------------------------|-------------------------------------------------------------------------|-------------------------------------------------------------------------|---------------------------------------------------------------------------------|
| <b>Experiment</b>                                                                  | <b>Repl<br/>cate<br/>No</b> | <b>Total number of<br/>merged paired-<br/>end reads<br/>(100bp x 2)</b> | <b>Total (%) number<br/>of merged reads<br/><math>\geq 100</math>bp</b> | <b>No (%) of merged<br/>reads mapping to<br/><math>\alpha</math>-satellites</b> |
| CENP-A <sup>LAP</sup><br>G1                                                        | 1                           | 37,088,538                                                              | 30,232,099 (81.5%)                                                      | 27,671,623 (74.6%)                                                              |
|                                                                                    | 2                           | 40,641,911                                                              | 33,438,763 (82.3%)                                                      | 30,342,295 (74.6%)                                                              |
| CENP-A <sup>LAP</sup><br>G2                                                        | 1                           | 39,939,734                                                              | 32,202,885 (80.6%)                                                      | 24,209,577 (60.6%)                                                              |
|                                                                                    | 2                           | 32,689,317                                                              | 25,933,735 (79.3%)                                                      | 19,566,369 (59.9%)                                                              |
| CENP-A <sup>LAP</sup><br>G1 Input                                                  | 1                           | 31,874,876                                                              | 28,835,317 (90.5%)                                                      | 952,554 (2.98%)                                                                 |

| <b>Table B. ChIP-seq combined replicate statistics for CENP-A<sup>+LAP</sup> chromatin</b> |                                                                    |                                                                         |                                                                                 |
|--------------------------------------------------------------------------------------------|--------------------------------------------------------------------|-------------------------------------------------------------------------|---------------------------------------------------------------------------------|
| <b>Experiment</b>                                                                          | <b>Total number of<br/>merged paired-end<br/>reads (100bp x 2)</b> | <b>Total (%) number<br/>of merged reads<br/><math>\geq 100</math>bp</b> | <b>No (%) of merged<br/>reads mapping to<br/><math>\alpha</math>-satellites</b> |
| CENP-A <sup>LAP</sup><br>G1                                                                | 77,730,449                                                         | 63,670,862<br>(81.9%)                                                   | 58,013,918 (74.6%)                                                              |
| CENP-A <sup>LAP</sup><br>G2                                                                | 72,629,051                                                         | 58,136,620<br>(79.9%)                                                   | 43,775,946 (60.2%)                                                              |

| <b>Experiment</b>              | <b>Replicate No</b> | <b>Total number of merged paired-end reads (100bp x 2)</b> | <b>Total (%) number of merged reads &gt;=100bp</b> | <b>No (%) of merged reads mapping to <math>\alpha</math>-satellites</b> |
|--------------------------------|---------------------|------------------------------------------------------------|----------------------------------------------------|-------------------------------------------------------------------------|
| CENP-A <sup>TAP</sup> RC       | 1                   | 9,436,346                                                  | 8,464,391 (89.7%)                                  | 4,588,228 (48.6%)                                                       |
|                                | 2                   | 69,039,423                                                 | 54,952,932 (79.6%)                                 | 31,053,433 (45%)                                                        |
| CENP-A <sup>TAP</sup> G1       | 1                   | 68,776,382                                                 | 54,522,683 (79.3%)                                 | 28,023,214 (40.7%)                                                      |
|                                | 2                   | 51,746,426                                                 | 40,328,176 (77.9%)                                 | 21,534,570 (41.6%)                                                      |
| CENP-A <sup>TAP</sup> mid S    | 1                   | 65,077,481                                                 | 50,476,007 (77.6%)                                 | 33,879,664 (52.1%)                                                      |
|                                | 2                   | 62,298,174                                                 | 48,772,959 (78.3%)                                 | 31,783,490 (51.0%)                                                      |
| CENP-A <sup>TAP</sup> G2       | 1                   | 49,206,313                                                 | 40,088,665 (81.5%)                                 | 25,204,739 (51.2%)                                                      |
|                                | 2                   | 60,985,667                                                 | 48,764,504 (80.0%)                                 | 33,414,704 (54.8%)                                                      |
| H3.1 <sup>TAP</sup> RC         | 1                   | 31,819,170                                                 | 27,823,087 (87.4%)                                 | 668,075 (2.1%)                                                          |
|                                | 2                   | 42,069,089                                                 | 36,187,314 (86.0%)                                 | 911,027 (2.2%)                                                          |
| CENP-A <sup>TAP</sup> RC Input | 1                   | 61,557,119                                                 | 61,612,349 (84.5%)                                 | 1,374,644 (2.2%)                                                        |

| <b>Experiment</b>           | <b>Total number of merged paired-end reads (100bp x 2)</b> | <b>Total (%) number of merged reads &gt;=100bp</b> | <b>No (%) of merged reads mapping to <math>\alpha</math>-satellites</b> |
|-----------------------------|------------------------------------------------------------|----------------------------------------------------|-------------------------------------------------------------------------|
| CENP-A <sup>TAP</sup> RC    | 78,475,769                                                 | 63,417,323 (80.8%)                                 | 35,641,661 (46.8%)                                                      |
| CENP-A <sup>TAP</sup> G1    | 120,522,808                                                | 94,850,859 (78.7%)                                 | 49,557,784 (41.2%)                                                      |
| CENP-A <sup>TAP</sup> mid S | 127,375,655                                                | 99,248,966 (77.9%)                                 | 65,663,154 (51.5%)                                                      |
| CENP-A <sup>TAP</sup> G2    | 110,191,980                                                | 88,853,169 (80.6%)                                 | 58,619,443 (53%)                                                        |
| H3.1 <sup>TAP</sup> RC      | 73,888,259                                                 | 64,010,401 (86.6%)                                 | 1,579,102 (2.15%)                                                       |

| <b>Experiment</b>        | <b>Replicate No</b> | <b>Total number of merged paired-end reads (100bp x 2)</b> | <b>Total (%) number of merged reads <math>\geq 100</math>bp</b> | <b>No (%) of merged reads mapping to <math>\alpha</math>-satellites</b> |
|--------------------------|---------------------|------------------------------------------------------------|-----------------------------------------------------------------|-------------------------------------------------------------------------|
| BrdU S1<br>Early S phase | 1                   | 48,838,225                                                 | 42,840,706 (87.7%)                                              | 144,337 (0.29%)                                                         |
|                          | 2                   | 938,746                                                    | 730,915 (77.8%)                                                 | 2,082 (0.22%)                                                           |
| BrdU S4<br>Mid S phase   | 1                   | 46,828,553                                                 | 40,991,823 (87.5%)                                              | 371,793 (0.79%)                                                         |
|                          | 2                   | 34,480,560                                                 | 31,507,686 (91.4%)                                              | 254,159 (0.73%)                                                         |
| BrdU S7<br>Late S phase  | 1                   | 40,899,839                                                 | 35,827,676 (87.6%)                                              | 1,657,902 (4.05%)                                                       |
|                          | 2                   | 41750,126                                                  | 35,667,382 (85.4%)                                              | 1,682,353 (4.03%)                                                       |
| BrdU S1 Input            | 1                   | 22,887,332                                                 | 21,177,083 (92.5%)                                              | 1,185,850 (5.2%)                                                        |
| BrdU S4 Input            | 1                   | 25,806,345                                                 | 23,810,449 (92.2%)                                              | 1,146,797 (4.4%)                                                        |
| BrdU S7 Input            | 1                   | 25,004,047                                                 | 23,205,784 (92.8%)                                              | 1,322,554 (5.3%)                                                        |

| <b>Experiment</b>        | <b>Total number of merged paired-end reads (100bp x 2)</b> | <b>Total (%) number of merged reads <math>\geq 100</math>bp</b> | <b>No (%) of merged reads mapping to <math>\alpha</math>-satellites</b> |
|--------------------------|------------------------------------------------------------|-----------------------------------------------------------------|-------------------------------------------------------------------------|
| BrdU S1<br>Early S phase | 49,776,971                                                 | 43,571,621 (82.8%)                                              | 146,419 (0.25%)                                                         |
| BrdU S4<br>Mid S phase   | 81,309,113                                                 | 72,499,509 (89.4%)                                              | 625,952 (0.76%)                                                         |
| BrdU S7<br>Late S phase  | 82,649,965                                                 | 71,495,058 (86.5%)                                              | 3,340,255 (4.04%)                                                       |

**Table S2. Endogenous CENP-A sequence mapping onto  $\alpha$ -satellite DNAs in human centromere reference models for each autosome and the X chromosome.** Centromere reference models are from Miga et al. (<sup>46</sup>, unpublished), generated with methods as previously described <sup>45</sup>. Length estimates are expected to be averaged across arrays from homologous chromosomes. **Column 1:** chromosome information, **column 2:** chromosome start position, **column 3:** chromosome end position, **column 4:** length in bp of each reference model as represented in the human assembly <sup>46,8</sup>, **column 5:** Genbank accession, **columns 6:** Genomic locus, if applicable, **column 7, 8, 9:** number of reads for CENP-A<sup>LAP</sup> G1, replicate samples 1 and 2, and input, respectively, that aligned to the  $\alpha$ -satellite reference model, **columns 10, 11, 12:** relative frequency of alignment to the  $\alpha$ -satellite reference model is given for CENP-A<sup>LAP</sup> G1, replicate samples 1 and 2, and input, respectively. **Columns 13, 14:** fold-enrichment of CENP-A<sup>LAP</sup> G1, replicate samples 1 and 2 at the  $\alpha$ -satellite reference model, relative to input. A summary of the reads and bases is given for those chromosomes that have several  $\alpha$ -satellite reference models. Arrays that are identical between different chromosome locations are indicated as follows: \*Sum of three near-identical arrays on chr1, 5, and 19; \*\*Sum of two near-identical arrays on chr5, and 19; \*\*\*Sum of acrocentric near-identical arrays on chr13, 14, 21 and 22. Sequence coordinates refer to the human GRCh38 assembly.

| hg38 chromo-<br>some<br>number | chromosome<br>coordinates<br>Start | chromosome<br>coordinates<br>End | Length<br>(bp)   | GenBank<br>Accession<br>number | Locus                   | CENP-A<br>G1-1<br>Read<br>count | CENP-A<br>G1-2<br>Read<br>count | Input<br>Read<br>count | CENP-A<br>G1-1<br>Relative<br>Frequency | CENP-A<br>G1-2<br>Relative<br>Frequency | Input<br>Relative<br>Frequency | CENP-A<br>G1-1<br>Enrichment | CENP-A<br>G1-2<br>Enrichment |
|--------------------------------|------------------------------------|----------------------------------|------------------|--------------------------------|-------------------------|---------------------------------|---------------------------------|------------------------|-----------------------------------------|-----------------------------------------|--------------------------------|------------------------------|------------------------------|
| chr1                           | 122,026,459                        | 122,224,535                      | 198,076          | GJ211836.1                     | N/A                     | 465                             | 400                             | 354                    | 1.29E-05                                | 1.05E-05                                | 1.11E-05                       | 1.16                         | 0.94                         |
| chr1                           | 122,224,635                        | 122,503,147                      | 278,512          | GJ211837.1                     | D1Z5                    | 6,636                           | 6,492                           | 2,363                  | 1.84E-04                                | 1.70E-04                                | 7.43E-05                       | 2.48                         | 2.29                         |
| chr1*                          | 122,503,247                        | 124,785,432                      | 2,282,185        | GJ212202.1                     | D1Z7/<br>D5Z2/<br>D19Z3 | 3,884,766                       | 4,104,057                       | 153,199                | 1.08E-01                                | 1.08E-01                                | 4.82E-03                       | <b>22.41</b>                 | <b>22.35</b>                 |
| chr1                           | 124,785,532                        | 124,849,129                      | 63,597           | GJ211855.1                     | N/A                     | 1,154                           | 1,189                           | 797                    | 3.21E-05                                | 3.12E-05                                | 2.51E-05                       | 1.28                         | 1.24                         |
| chr1                           | 124,849,229                        | 124,932,724                      | 83,495           | GJ211857.1                     | N/A                     | 4,408                           | 4,565                           | 965                    | 1.22E-04                                | 1.20E-04                                | 3.03E-05                       | 4.04                         | 3.95                         |
| <b>Sum<br/>chr1</b>            |                                    |                                  | <b>2,905,865</b> |                                |                         | <b>3,897,429</b>                | <b>4,116,703</b>                | <b>157,678</b>         | <b>1.08E-01</b>                         | <b>1.08E-01</b>                         | <b>4.96E-03</b>                | <b>21.84</b>                 | <b>21.78</b>                 |
| <b>chr2</b>                    | <b>92,188,145</b>                  | <b>94,090,557</b>                | <b>1,902,412</b> | <b>GJ211860.1</b>              | <b>D2Z1</b>             | <b>772,858</b>                  | <b>773,709</b>                  | <b>13,622</b>          | <b>2.15E-02</b>                         | <b>2.03E-02</b>                         | <b>4.28E-04</b>                | <b>50.14</b>                 | <b>47.39</b>                 |
| chr3                           | 90,772,458                         | 91,233,586                       | 461,128          | GJ211866.1                     | N/A                     | 3,287                           | 2,626                           | 3,396                  | 9.13E-05                                | 6.89E-05                                | 1.07E-04                       | 0.86                         | 0.65                         |
| chr3                           | 91,233,686                         | 91,247,622                       | 13,936           | GJ211867.1                     | N/A                     | 90                              | 93                              | 146                    | 2.50E-06                                | 2.44E-06                                | 4.59E-06                       | 0.54                         | 0.53                         |
| chr3                           | 91,553,419                         | 93,655,574                       | 2,102,155        | GJ211871.1                     | D3Z1                    | 726,106                         | 743,093                         | 59,085                 | 2.02E-02                                | 1.95E-02                                | 1.86E-03                       | <b>10.86</b>                 | <b>10.49</b>                 |
| <b>Sum<br/>chr3</b>            |                                    |                                  | <b>2,577,219</b> |                                |                         | <b>729,483</b>                  | <b>745,812</b>                  | <b>62,627</b>          | <b>2.03E-02</b>                         | <b>1.96E-02</b>                         | <b>1.97E-03</b>                | <b>10.29</b>                 | <b>9.94</b>                  |
| <b>chr4</b>                    | <b>49,712,061</b>                  | <b>51,743,951</b>                | <b>2,031,890</b> | <b>GJ211881.1</b>              | <b>D4Z1</b>             | <b>802,017</b>                  | <b>880,598</b>                  | <b>25,601</b>          | <b>2.23E-02</b>                         | <b>2.31E-02</b>                         | <b>8.05E-04</b>                | <b>27.69</b>                 | <b>28.70</b>                 |
| chr5                           | 46,485,900                         | 46,569,062                       | 83,162           | GJ211882.1                     | N/A                     | 1,138                           | 1,262                           | 727                    | 3.16E-05                                | 3.31E-05                                | 2.29E-05                       | 1.38                         | 1.45                         |
| chr5                           | 46,569,162                         | 46,796,725                       | 227,563          | GJ211883.1                     | N/A                     | 1,055                           | 1,064                           | 632                    | 2.93E-05                                | 2.79E-05                                | 1.99E-05                       | 1.48                         | 1.40                         |
| chr5                           | 46,796,825                         | 47,061,288                       | 264,463          | GJ211884.1                     | N/A                     | 2,175                           | 2,406                           | 1,712                  | 6.04E-05                                | 6.31E-05                                | 5.38E-05                       | 1.12                         | 1.17                         |
| chr5                           | 47,106,994                         | 47,153,339                       | 46,345           | GJ211886.1                     | N/A                     | 1,180                           | 1,321                           | 864                    | 3.28E-05                                | 3.47E-05                                | 2.72E-05                       | 1.21                         | 1.28                         |
| chr5                           | 47,153,439                         | 47,296,069                       | 142,630          | GJ211887.1                     | N/A                     | 1,589                           | 1,669                           | 361                    | 4.42E-05                                | 4.38E-05                                | 1.14E-05                       | 3.89                         | 3.86                         |

|                      |                   |                   |                  |                   |                         |                  |                  |                |                 |                 |                 |              |              |
|----------------------|-------------------|-------------------|------------------|-------------------|-------------------------|------------------|------------------|----------------|-----------------|-----------------|-----------------|--------------|--------------|
| chr5*                | 47,309,184        | 49,591,369        | 2,282,185        | GJ212203.1        | D1Z7/<br>D5Z2/<br>D19Z3 | 3,884,766        | 4,104,057        | 153,199        | 1.08E-01        | 1.08E-01        | 4.82E-03        | 22.41        | 22.35        |
| chr5**               | 49,667,531        | 49,721,203        | 53,672           | GJ211904.2        | N/A                     | 421              | 377              | 464            | 1.17E-05        | 9.89E-06        | 1.46E-05        | 0.80         | 0.68         |
| chr5                 | 49,721,303        | 50,059,807        | 338,504          | GJ211906.2        | N/A                     | 1,094            | 1,196            | 1,456          | 3.04E-05        | 3.14E-05        | 4.58E-05        | 0.66         | 0.69         |
| <b>Sum<br/>chr5</b>  |                   |                   | <b>3,438,524</b> |                   |                         | <b>3,893,418</b> | <b>4,113,352</b> | <b>159,415</b> | <b>1.08E-01</b> | <b>1.08E-01</b> | <b>5.01E-03</b> | <b>21.58</b> | <b>21.53</b> |
| <b>chr6</b>          | <b>58,553,888</b> | <b>59,829,934</b> | <b>1,276,046</b> | <b>GJ211907.1</b> | <b>D6Z1</b>             | <b>1,240,000</b> | <b>1,360,728</b> | <b>41,164</b>  | <b>3.45E-02</b> | <b>3.57E-02</b> | <b>1.29E-03</b> | <b>26.62</b> | <b>27.58</b> |
| chr7                 | 58,169,653        | 60,828,234        | 2,658,581        | GJ211908.1        | D7Z1                    | 987,890          | 1,080,834        | 25,905         | 2.75E-02        | 2.84E-02        | 8.15E-04        | 33.70        | 34.81        |
| chr7                 | 61,377,788        | 61,528,020        | 150,232          | GJ212194.1        | D7Z2                    | 1,818            | 1,897            | 890            | 5.05E-05        | 4.98E-05        | 2.80E-05        | 1.81         | 1.78         |
| <b>Sum<br/>chr7</b>  |                   |                   | <b>2,808,813</b> |                   |                         | <b>989,708</b>   | <b>1,082,731</b> | <b>26,795</b>  | <b>2.75E-02</b> | <b>2.84E-02</b> | <b>8.43E-04</b> | <b>32.64</b> | <b>33.71</b> |
| <b>chr8</b>          | <b>44,033,744</b> | <b>45,877,265</b> | <b>1,843,521</b> | <b>GJ211909.1</b> | <b>D8Z2</b>             | <b>962,237</b>   | <b>1,055,322</b> | <b>21,112</b>  | <b>2.67E-02</b> | <b>2.77E-02</b> | <b>6.64E-04</b> | <b>40.28</b> | <b>41.70</b> |
| <b>chr9</b>          | <b>43,389,635</b> | <b>45,518,558</b> | <b>2,128,923</b> | <b>GJ211929.1</b> | <b>D9Z4</b>             | <b>726,448</b>   | <b>801,194</b>   | <b>16,178</b>  | <b>2.02E-02</b> | <b>2.10E-02</b> | <b>5.09E-04</b> | <b>39.68</b> | <b>41.32</b> |
| chr10                | 39,686,682        | 39,935,900        | 249,218          | GJ211930.1        | N/A                     | 215,957          | 211,519          | 859            | 6.00E-03        | 5.55E-03        | 2.70E-05        | 222.18       | 205.43       |
| chr10                | 39,936,000        | 41,497,440        | 1,561,440        | GJ211932.1        | D10Z1                   | 503,166          | 508,384          | 14,260         | 1.40E-02        | 1.33E-02        | 4.48E-04        | 31.18        | 29.74        |
| chr10                | 41,497,540        | 41,545,720        | 48,180           | GJ211933.1        | N/A                     | 18,519           | 16,696           | 1,314          | 5.15E-04        | 4.38E-04        | 4.13E-05        | 12.46        | 10.60        |
| chr10                | 41,545,820        | 41,593,521        | 47,701           | GJ211936.1        | N/A                     | 4,002            | 3,829            | 1,465          | 1.11E-04        | 1.00E-04        | 4.61E-05        | 2.41         | 2.18         |
| <b>Sum<br/>chr10</b> |                   |                   | <b>1,906,539</b> |                   |                         | <b>741,644</b>   | <b>740,428</b>   | <b>17,898</b>  | <b>2.06E-02</b> | <b>1.94E-02</b> | <b>5.63E-04</b> | <b>36.62</b> | <b>34.51</b> |
| chr11                | 51,078,348        | 51,090,317        | 11,969           | GJ211938.1        | N/A                     | 63               | 23               | 29             | 1.75E-06        | 6.03E-07        | 9.12E-07        | 1.92         | 0.66         |
| chr11                | 51,090,417        | 54,342,399        | 3,251,982        | GJ211943.1        | D11Z1                   | 811,562          | 827,321          | 35,762         | 2.26E-02        | 2.17E-02        | 1.12E-03        | 20.06        | 19.30        |
| chr11                | 54,342,499        | 54,425,074        | 82,575           | GJ211948.1        | N/A                     | 74,089           | 75,567           | 2,855          | 2.06E-03        | 1.98E-03        | 8.98E-05        | 22.93        | 22.08        |
| <b>Sum<br/>chr11</b> |                   |                   | <b>3,346,526</b> |                   |                         | <b>885,714</b>   | <b>902,911</b>   | <b>38,646</b>  | <b>2.46E-02</b> | <b>2.37E-02</b> | <b>1.22E-03</b> | <b>20.25</b> | <b>19.49</b> |
| chr12                | 34,769,407        | 34,816,611        | 47,204           | GJ211949.1        | N/A                     | 773              | 477              | 274            | 2.15E-05        | 1.25E-05        | 8.62E-06        | 2.49         | 1.45         |
| chr12                | 34,835,295        | 37,185,252        | 2,349,957        | GJ211954.1        | D12Z3                   | 1,559,732        | 1,576,847        | 59,791         | 4.33E-02        | 4.14E-02        | 1.88E-03        | 23.05        | 22.00        |
| <b>Sum<br/>chr12</b> |                   |                   | <b>2,397,161</b> |                   |                         | <b>1,560,505</b> | <b>1,577,324</b> | <b>60,065</b>  | <b>4.34E-02</b> | <b>4.14E-02</b> | <b>1.89E-03</b> | <b>22.96</b> | <b>21.91</b> |
| chr13***             | 16,000,000        | 16,022,537        | 22,537           | GJ211955.2        | N/A                     | 417              | 417              | 429            | 1.16E-05        | 1.09E-05        | 1.35E-05        | 0.86         | 0.81         |
| chr13***             | 16,022,637        | 16,110,659        | 88,022           | GJ211961.2        | N/A                     | 556              | 529              | 587            | 1.54E-05        | 1.39E-05        | 1.85E-05        | 0.84         | 0.75         |
| chr13***             | 16,110,759        | 16,164,892        | 54,133           | GJ211962.2        | N/A                     | 2,684            | 2,706            | 3,491          | 7.46E-05        | 7.10E-05        | 1.10E-04        | 0.68         | 0.65         |
| chr13***             | 16,164,992        | 16,228,527        | 63,535           | GJ211963.2        | N/A                     | 1,392            | 1,369            | 1,549          | 3.87E-05        | 3.59E-05        | 4.87E-05        | 0.79         | 0.74         |
| chr13***             | 16,228,627        | 16,249,297        | 20,670           | GJ211965.2        | N/A                     | 1,621            | 1,627            | 1,914          | 4.50E-05        | 4.27E-05        | 6.02E-05        | 0.75         | 0.71         |
| chr13***             | 16,249,397        | 16,256,067        | 6,670            | GJ211967.2        | N/A                     | 2,773            | 2,699            | 1,877          | 7.71E-05        | 7.08E-05        | 5.90E-05        | 1.31         | 1.20         |

|                      |            |            |                  |            |                                      |                  |                  |               |                 |                 |                 |              |              |
|----------------------|------------|------------|------------------|------------|--------------------------------------|------------------|------------------|---------------|-----------------|-----------------|-----------------|--------------|--------------|
| chr13***             | 16,256,167 | 16,259,412 | 3,245            | GJ211968.2 | N/A                                  | 64               | 61               | 53            | 1.78E-06        | 1.60E-06        | 1.67E-06        | 1.07         | 0.96         |
| chr13***             | 16,259,512 | 16,282,073 | 22,561           | GJ211969.2 | N/A                                  | 290              | 294              | 274           | 8.06E-06        | 7.71E-06        | 8.62E-06        | 0.94         | 0.90         |
| chr13***             | 16,282,173 | 17,416,384 | 1,134,211        | GJ211972.2 | N/A                                  | 2,485,354        | 2,490,600        | 50,193        | 6.91E-02        | 6.53E-02        | 1.58E-03        | <b>43.76</b> | <b>41.40</b> |
| chr13***             | 17,416,484 | 17,416,824 | 340              | GJ212205.1 | N/A                                  | 12               | 15               | 1             | 3.33E-07        | 3.93E-07        | 3.14E-08        | <b>10.60</b> | <b>12.51</b> |
| chr13***             | 17,416,924 | 17,417,264 | 340              | GJ212206.1 | N/A                                  | 29               | 34               | 1             | 8.06E-07        | 8.92E-07        | 3.14E-08        | <b>25.63</b> | <b>28.37</b> |
| chr13***             | 17,417,364 | 17,418,562 | 1,198            | GJ211986.2 | N/A                                  | 576              | 563              | 432           | 1.60E-05        | 1.48E-05        | 1.36E-05        | 1.18         | 1.09         |
| chr13***             | 17,418,662 | 18,051,248 | 632,586          | GJ211991.2 | D13Z1/<br>D21Z1<br>alphaRI,<br>L1.26 | 1,535,634        | 1,543,548        | 24,960        | 4.27E-02        | 4.05E-02        | 7.85E-04        | <b>54.37</b> | <b>51.59</b> |
| <b>Sum<br/>chr13</b> |            |            | <b>2,050,048</b> |            |                                      | <b>4,031,402</b> | <b>4,044,462</b> | <b>85,761</b> | <b>1.12E-01</b> | <b>1.06E-01</b> | <b>2.70E-03</b> | <b>41.54</b> | <b>39.34</b> |
| chr14***             | 16,000,000 | 16,022,537 | 22,537           | GJ211992.2 | N/A                                  | 417              | 417              | 429           | 1.16E-05        | 1.09E-05        | 1.35E-05        | 0.86         | 0.81         |
| chr14***             | 16,140,627 | 16,228,649 | 88,022           | GJ211998.2 | N/A                                  | 556              | 529              | 587           | 1.54E-05        | 1.39E-05        | 1.85E-05        | 0.84         | 0.75         |
| chr14***             | 16,228,749 | 16,282,882 | 54,133           | GJ211999.2 | N/A                                  | 2,684            | 2,706            | 3,491         | 7.46E-05        | 7.10E-05        | 1.10E-04        | 0.68         | 0.65         |
| chr14***             | 16,282,982 | 16,346,517 | 63,535           | GJ212000.2 | N/A                                  | 1,392            | 1,369            | 1,549         | 3.87E-05        | 3.59E-05        | 4.87E-05        | 0.79         | 0.74         |
| chr14***             | 16,346,617 | 16,367,287 | 20,670           | GJ212002.2 | N/A                                  | 1,621            | 1,627            | 1,914         | 4.50E-05        | 4.27E-05        | 6.02E-05        | 0.75         | 0.71         |
| chr14***             | 16,367,387 | 16,374,057 | 6,670            | GJ212004.2 | N/A                                  | 2,773            | 2,699            | 1,877         | 7.71E-05        | 7.08E-05        | 5.90E-05        | 1.31         | 1.20         |
| chr14***             | 16,374,157 | 16,377,402 | 3,245            | GJ212005.2 | N/A                                  | 64               | 61               | 53            | 1.78E-06        | 1.60E-06        | 1.67E-06        | 1.07         | 0.96         |
| chr14***             | 16,377,502 | 16,400,063 | 22,561           | GJ212006.2 | N/A                                  | 290              | 294              | 274           | 8.06E-06        | 7.71E-06        | 8.62E-06        | 0.94         | 0.90         |
| chr14***             | 16,404,448 | 17,538,659 | 1,134,211        | GJ212009.2 | N/A                                  | 2,485,354        | 2,490,600        | 50,193        | 6.91E-02        | 6.53E-02        | 1.58E-03        | <b>43.76</b> | <b>41.40</b> |
| chr14***             | 17,538,759 | 17,539,099 | 340              | GJ212210.1 | N/A                                  | 12               | 15               | 1             | 3.33E-07        | 3.93E-07        | 3.14E-08        | <b>10.60</b> | <b>12.51</b> |
| chr14***             | 17,539,199 | 17,539,539 | 340              | GJ212211.1 | N/A                                  | 29               | 34               | 1             | 8.06E-07        | 8.92E-07        | 3.14E-08        | <b>25.63</b> | <b>28.37</b> |
| chr14***             | 17,539,639 | 17,540,837 | 1,198            | GJ212023.2 | N/A                                  | 576              | 563              | 432           | 1.60E-05        | 1.48E-05        | 1.36E-05        | 1.18         | 1.09         |
| chr14***             | 17,540,937 | 18,173,523 | 632,586          | GJ212028.2 | N/A                                  | 1,535,634        | 1,543,548        | 24,960        | 4.27E-02        | 4.05E-02        | 7.85E-04        | <b>54.37</b> | <b>51.59</b> |
| <b>Sum<br/>chr14</b> |            |            | <b>2,050,048</b> |            |                                      | <b>4,031,402</b> | <b>4,044,462</b> | <b>85,761</b> | <b>1.12E-01</b> | <b>1.06E-01</b> | <b>2.70E-03</b> | <b>41.54</b> | <b>39.34</b> |
| chr15                | 17,083,673 | 17,498,951 | 415,278          | GJ212036.1 | N/A                                  | 1,740            | 1,718            | 1,281         | 4.83E-05        | 4.51E-05        | 4.03E-05        | 1.20         | 1.12         |
| chr15                | 17,499,051 | 18,355,008 | 855,957          | GJ212042.1 | N/A                                  | 9,617            | 9,910            | 4,554         | 2.67E-04        | 2.60E-04        | 1.43E-04        | 1.87         | 1.82         |
| chr15                | 18,355,108 | 19,725,254 | 1,370,146        | GJ212045.1 | D15Z3                                | 1,195,175        | 1,187,663        | 14,547        | 3.32E-02        | 3.12E-02        | 4.57E-04        | <b>72.61</b> | <b>68.11</b> |
| <b>Sum<br/>chr15</b> |            |            | <b>2,641,381</b> |            |                                      | <b>1,206,532</b> | <b>1,199,291</b> | <b>20,382</b> | <b>3.35E-02</b> | <b>3.15E-02</b> | <b>6.41E-04</b> | <b>52.31</b> | <b>49.09</b> |
| chr16                | 36,311,158 | 36,334,460 | 23,302           | GJ212046.1 | N/A                                  | 419              | 387              | 147           | 1.16E-05        | 1.02E-05        | 4.62E-06        | 2.52         | 2.20         |



|                  |            |            |                  |            |                         |                  |                  |                |                 |                 |                 |              |              |
|------------------|------------|------------|------------------|------------|-------------------------|------------------|------------------|----------------|-----------------|-----------------|-----------------|--------------|--------------|
| chr16            | 36,337,666 | 38,265,669 | 1,928,003        | GJ212051.1 | D16Z2                   | 857,505          | 872,514          | 19,641         | 2.38E-02        | 2.29E-02        | 6.18E-04        | <b>38.58</b> | <b>37.06</b> |
| <b>Sum chr16</b> |            |            | <b>1,951,305</b> |            |                         | <b>857,924</b>   | <b>872,901</b>   | <b>19,788</b>  | <b>2.38E-02</b> | <b>2.29E-02</b> | <b>6.22E-04</b> | <b>38.32</b> | <b>36.80</b> |
| chr17            | 22,813,679 | 23,194,918 | 381,239          | GJ212053.1 | D17Z1B                  | 48,160           | 47,722           | 2,792          | 1.34E-03        | 1.25E-03        | 8.78E-05        | <b>15.24</b> | <b>14.26</b> |
| chr17            | 23,195,018 | 26,566,633 | 3,371,615        | GJ212054.1 | D17Z1                   | 358,116          | 338,203          | 11,231         | 9.95E-03        | 8.87E-03        | 3.53E-04        | <b>28.18</b> | <b>25.12</b> |
| chr17            | 26,566,733 | 26,616,164 | 49,431           | GJ212055.1 | N/A                     | 87,241           | 90,634           | 2,765          | 2.42E-03        | 2.38E-03        | 8.69E-05        | <b>27.88</b> | <b>27.35</b> |
| <b>Sum chr17</b> |            |            | <b>3,802,285</b> |            |                         | <b>493,517</b>   | <b>476,559</b>   | <b>16,788</b>  | <b>1.37E-02</b> | <b>1.25E-02</b> | <b>5.28E-04</b> | <b>25.98</b> | <b>23.68</b> |
| chr18            | 15,460,899 | 15,780,377 | 319,478          | GJ212060.1 | N/A                     | 16,312           | 15,458           | 2,974          | 4.53E-04        | 4.05E-04        | 9.35E-05        | 4.85         | 4.34         |
| chr18            | 15,797,855 | 20,561,439 | 4,763,584        | GJ212062.1 | D18Z1                   | 530,474          | 534,958          | 16,477         | 1.47E-02        | 1.40E-02        | 5.18E-04        | <b>28.45</b> | <b>27.09</b> |
| chr18            | 20,603,247 | 20,696,289 | 93,042           | GJ212066.1 | D18Z2                   | 2,198            | 2,120            | 737            | 6.11E-05        | 5.56E-05        | 2.32E-05        | 2.64         | 2.40         |
| chr18            | 20,696,389 | 20,736,025 | 39,636           | GJ212067.1 | N/A                     | 503              | 386              | 127            | 1.40E-05        | 1.01E-05        | 3.99E-06        | 3.50         | 2.54         |
| chr18            | 20,736,125 | 20,813,083 | 76,958           | GJ212069.1 | N/A                     | 812              | 650              | 170            | 2.26E-05        | 1.71E-05        | 5.35E-06        | 4.22         | 3.19         |
| chr18            | 20,839,797 | 20,861,206 | 21,409           | GJ212071.1 | N/A                     | 120              | 92               | 32             | 3.33E-06        | 2.41E-06        | 1.01E-06        | 3.31         | 2.40         |
| <b>Sum chr18</b> |            |            | <b>5,314,107</b> |            |                         | <b>550,419</b>   | <b>553,664</b>   | <b>20,517</b>  | <b>1.53E-02</b> | <b>1.45E-02</b> | <b>6.45E-04</b> | <b>23.71</b> | <b>22.51</b> |
| chr19**          | 24,498,980 | 24,552,652 | 53,672           | GJ212072.2 | N/A                     | 421              | 377              | 464            | 1.17E-05        | 9.89E-06        | 1.46E-05        | 0.80         | 0.68         |
| chr19            | 24,552,752 | 24,891,256 | 338,504          | GJ212077.2 | N/A                     | 1,176            | 1,165            | 1,617          | 3.27E-05        | 3.06E-05        | 5.08E-05        | 0.64         | 0.60         |
| chr19*           | 24,908,689 | 27,190,874 | 2,282,185        | GJ212201.1 | D12Z/<br>D5Z2/<br>D19Z3 | 3,884,766        | 4,104,057        | 153,199        | 1.08E-01        | 1.08E-01        | 4.82E-03        | <b>22.41</b> | <b>22.35</b> |
| <b>Sum chr19</b> |            |            | <b>2,674,361</b> |            |                         | <b>3,886,363</b> | <b>4,105,599</b> | <b>155,280</b> | <b>1.08E-01</b> | <b>1.08E-01</b> | <b>4.88E-03</b> | <b>22.12</b> | <b>22.06</b> |
| chr20            | 26,436,232 | 26,586,955 | 150,723          | GJ212091.1 | N/A                     | 8,724            | 6,977            | 2,142          | 2.42E-04        | 1.83E-04        | 6.73E-05        | 3.60         | 2.72         |
| chr20            | 26,608,145 | 28,494,539 | 1,886,394        | GJ212093.1 | D20Z2                   | 578,724          | 588,963          | 11,545         | 1.61E-02        | 1.54E-02        | 3.63E-04        | <b>44.30</b> | <b>42.56</b> |
| chr20            | 28,508,997 | 28,556,953 | 47,956           | GJ212095.1 | N/A                     | 3,688            | 3,180            | 2,219          | 1.02E-04        | 8.34E-05        | 6.98E-05        | 1.47         | 1.20         |
| chr20            | 28,648,108 | 28,728,874 | 80,766           | GJ212105.1 | N/A                     | 279              | 276              | 378            | 7.75E-06        | 7.24E-06        | 1.19E-05        | 0.65         | 0.61         |
| chr20            | 29,125,793 | 29,204,668 | 78,875           | GJ212107.1 | N/A                     | 174              | 136              | 204            | 4.83E-06        | 3.57E-06        | 6.41E-06        | 0.75         | 0.56         |
| chr20            | 29,917,404 | 30,038,348 | 120,944          | GJ212117.1 | N/A                     | 379              | 246              | 297            | 1.05E-05        | 6.45E-06        | 9.34E-06        | 1.13         | 0.69         |
| <b>Sum chr20</b> |            |            | <b>2,365,658</b> |            |                         | <b>591,968</b>   | <b>599,778</b>   | <b>16,785</b>  | <b>1.64E-02</b> | <b>1.57E-02</b> | <b>5.28E-04</b> | <b>31.17</b> | <b>29.81</b> |
| chr21***         | 10,864,560 | 10,887,097 | 22,537           | GJ212118.2 | N/A                     | 417              | 417              | 429            | 1.16E-05        | 1.09E-05        | 1.35E-05        | 0.86         | 0.81         |
| chr21***         | 10,887,197 | 10,975,219 | 88,022           | GJ212124.2 | N/A                     | 556              | 529              | 587            | 1.54E-05        | 1.39E-05        | 1.85E-05        | 0.84         | 0.75         |
| chr21***         | 10,975,319 | 11,029,452 | 54,133           | GJ212125.2 | N/A                     | 2,684            | 2,706            | 3,491          | 7.46E-05        | 7.10E-05        | 1.10E-04        | 0.68         | 0.65         |
| chr21***         | 11,029,552 | 11,093,087 | 63,535           | GJ212126.2 | N/A                     | 1,392            | 1,369            | 1,549          | 3.87E-05        | 3.59E-05        | 4.87E-05        | 0.79         | 0.74         |



|                      |                   |                   |                  |                   |                                      |                  |                  |               |                 |                 |                 |              |              |
|----------------------|-------------------|-------------------|------------------|-------------------|--------------------------------------|------------------|------------------|---------------|-----------------|-----------------|-----------------|--------------|--------------|
| chr21***             | 11,093,187        | 11,113,857        | 20,670           | GJ212128.2        | N/A                                  | 1,621            | 1,627            | 1,914         | 4.50E-05        | 4.27E-05        | 6.02E-05        | 0.75         | 0.71         |
| chr21***             | 11,113,957        | 11,120,627        | 6,670            | GJ212130.2        | N/A                                  | 2,773            | 2,699            | 1,877         | 7.71E-05        | 7.08E-05        | 5.90E-05        | 1.31         | 1.20         |
| chr21***             | 11,120,727        | 11,123,972        | 3,245            | GJ212131.2        | N/A                                  | 64               | 61               | 53            | 1.78E-06        | 1.60E-06        | 1.67E-06        | 1.07         | 0.96         |
| chr21***             | 11,124,072        | 11,146,633        | 22,561           | GJ212132.2        | N/A                                  | 290              | 294              | 274           | 8.06E-06        | 7.71E-06        | 8.62E-06        | 0.94         | 0.90         |
| chr21***             | 11,146,733        | 12,280,944        | 1,134,211        | GJ212135.2        | N/A                                  | 2,485,354        | 2,490,600        | 50,193        | 6.91E-02        | 6.53E-02        | 1.58E-03        | <b>43.76</b> | <b>41.40</b> |
| chr21***             | 12,281,044        | 12,281,384        | 340              | GJ212204.1        | N/A                                  | 12               | 15               | 1             | 3.33E-07        | 3.93E-07        | 3.14E-08        | <b>10.60</b> | <b>12.51</b> |
| chr21***             | 12,281,484        | 12,281,824        | 340              | GJ212207.1        | N/A                                  | 29               | 34               | 1             | 8.06E-07        | 8.92E-07        | 3.14E-08        | <b>25.63</b> | <b>28.37</b> |
| chr21***             | 12,281,924        | 12,283,122        | 1,198            | GJ212149.2        | N/A                                  | 576              | 563              | 432           | 1.60E-05        | 1.48E-05        | 1.36E-05        | 1.18         | 1.09         |
| chr21***             | 12,283,222        | 12,915,808        | 632,586          | GJ212154.2        | D13Z1/<br>D21Z1<br>alphaRI,<br>L1.26 | 1,535,634        | 1,543,548        | 24,960        | 4.27E-02        | 4.05E-02        | 7.85E-04        | <b>54.37</b> | <b>51.59</b> |
| <b>Sum<br/>chr21</b> |                   |                   | <b>2,050,048</b> |                   |                                      | <b>4,031,402</b> | <b>4,044,462</b> | <b>85,761</b> | <b>1.12E-01</b> | <b>1.06E-01</b> | <b>2.70E-03</b> | <b>41.54</b> | <b>39.34</b> |
| chr22***             | 12,954,788        | 12,977,325        | 22,537           | GJ212155.2        | N/A                                  | 417              | 417              | 429           | 1.16E-05        | 1.09E-05        | 1.35E-05        | 0.86         | 0.81         |
| chr22***             | 13,021,422        | 13,109,444        | 88,022           | GJ212161.2        | N/A                                  | 556              | 529              | 587           | 1.54E-05        | 1.39E-05        | 1.85E-05        | 0.84         | 0.75         |
| chr22***             | 13,109,544        | 13,163,677        | 54,133           | GJ212162.2        | N/A                                  | 2,684            | 2,706            | 3,491         | 7.46E-05        | 7.10E-05        | 1.10E-04        | 0.68         | 0.65         |
| chr22***             | 13,163,777        | 13,227,312        | 63,535           | GJ212163.2        | N/A                                  | 1,392            | 1,369            | 1,549         | 3.87E-05        | 3.59E-05        | 4.87E-05        | 0.79         | 0.74         |
| chr22***             | 13,227,412        | 13,248,082        | 20,670           | GJ212165.2        | N/A                                  | 1,621            | 1,627            | 1,914         | 4.50E-05        | 4.27E-05        | 6.02E-05        | 0.75         | 0.71         |
| chr22***             | 13,248,182        | 13,254,852        | 6,670            | GJ212167.2        | N/A                                  | 2,773            | 2,699            | 1,877         | 7.71E-05        | 7.08E-05        | 5.90E-05        | 1.31         | 1.20         |
| chr22***             | 13,254,952        | 13,258,197        | 3,245            | GJ212168.2        | N/A                                  | 64               | 61               | 53            | 1.78E-06        | 1.60E-06        | 1.67E-06        | 1.07         | 0.96         |
| chr22***             | 13,258,297        | 13,280,858        | 22,561           | GJ212169.2        | N/A                                  | 290              | 294              | 274           | 8.06E-06        | 7.71E-06        | 8.62E-06        | 0.94         | 0.90         |
| chr22***             | 13,285,243        | 14,419,454        | 1,134,211        | GJ212172.2        | N/A                                  | 2,485,354        | 2,490,600        | 50,193        | 6.91E-02        | 6.53E-02        | 1.58E-03        | <b>43.76</b> | <b>41.40</b> |
| chr22***             | 14,419,554        | 14,419,894        | 340              | GJ212208.1        | N/A                                  | 12               | 15               | 1             | 3.33E-07        | 3.93E-07        | 3.14E-08        | <b>10.60</b> | <b>12.51</b> |
| chr22***             | 14,419,994        | 14,420,334        | 340              | GJ212209.1        | N/A                                  | 29               | 34               | 1             | 8.06E-07        | 8.92E-07        | 3.14E-08        | <b>25.63</b> | <b>28.37</b> |
| chr22***             | 14,420,434        | 14,421,632        | 1,198            | GJ212186.2        | N/A                                  | 576              | 563              | 432           | 1.60E-05        | 1.48E-05        | 1.36E-05        | 1.18         | 1.09         |
| chr22***             | 14,421,732        | 15,054,318        | 632,586          | GJ212191.2        | N/A                                  | 1,535,634        | 1,543,548        | 24,960        | 4.27E-02        | 4.05E-02        | 7.85E-04        | <b>54.37</b> | <b>51.59</b> |
| <b>Sum<br/>chr22</b> |                   |                   | <b>2,050,048</b> |                   |                                      | <b>4,031,402</b> | <b>4,044,462</b> | <b>85,761</b> | <b>1.12E-01</b> | <b>1.06E-01</b> | <b>2.70E-03</b> | <b>41.54</b> | <b>39.34</b> |
| <b>chrX</b>          | <b>58,605,579</b> | <b>62,412,542</b> | <b>3,806,963</b> | <b>GJ212192.1</b> | <b>DXZ1</b>                          | <b>725,621</b>   | <b>794,981</b>   | <b>17,185</b> | <b>2.02E-02</b> | <b>2.09E-02</b> | <b>5.40E-04</b> | <b>37.32</b> | <b>38.59</b> |

**Primary antibodies**

| <b>Antibody</b>                  | <b>Species</b> | <b>Assay and dilution</b>  | <b>Source</b>                | <b>Catalogue</b>          | <b>Validation</b>                                           |
|----------------------------------|----------------|----------------------------|------------------------------|---------------------------|-------------------------------------------------------------|
| BrdU                             | Mouse          | Repli-seq                  | Becton-Dickinson Biosciences | CAT # 555627              | used for Repli-seq previously (Hansen et al., 2010)         |
| GFP                              | Mouse          | CENP-ALAP ChIP-seq         | MSKCC antibody core facility | clone 19C8 and clone 19F7 | validated previously by us and others                       |
| rabbit IgG                       | rabbit         | CENP-ATAP ChIP-seq         | Sigma-Aldrich                | CAT # I5006               | validated previously by us (Foltz et al., 2006) and others  |
| CENP-A                           | rabbit         | Immunoblot 1:1,000         | Cell Signaling Technology    | CAT # 2186                | validated in Fig. 6o, also previously used by us and others |
| CAF1p150                         | rabbit         | Immunoblot 1:500           | Santa Cruz                   | CAT # sc-10772            | validated in Fig. 6o; also see manufacturer's data sheet    |
| CAF1p60                          | rabbit         | Immunoblot 1:1,000         | Bethyl Laboratories          | CAT # A301-085A           | validated in Fig. 6o; also see manufacturer's data sheet    |
| CAF1p48                          | rabbit         | Immunoblot 1:1,000         | Bethyl Laboratories          | CAT # A301-206A           | validated in Fig. 6o; also see manufacturer's data sheet    |
| MCM2                             | rabbit         | Immunoblot 1:1,000         | Abcam                        | CAT # Ab4461              | validated in Fig. 6o; also see manufacturer's data sheet    |
| CENP-B                           | rabbit         | Immunofluorescence 1:1,000 | Abcam                        | CAT # 25734               | validated in Fig. S1d and previously by us and others       |
| GFP                              | Mouse          | Immunofluorescence 1:500   | Roche                        | CAT # 11814460001         | validated in Fig. S1c and previously by us and others       |
| anti-centromere antibodies (ACA) | human          | Immunofluorescence 1:500   | Antibodies Inc               | CAT # 15-234-0001         | validated in Fig. S1c and previously by us and others       |

**Secondary antibodies**

| <b>Antibody</b>        | <b>Species</b> | <b>Dilution</b>          | <b>Source</b>        | <b>Catalogue number</b> |
|------------------------|----------------|--------------------------|----------------------|-------------------------|
| Sheep anti-mouse HRP   | sheep          | Immunoblot 1:4,000       | GE Healthcare        | NA931V                  |
| donkey anti-rabbit HRP | donkey         | Immunoblot 1:4,000       | GE Healthcare        | NA934V                  |
| donkey anti-human TR   | donkey         | Immunofluorescence 1:300 | Jackson Laboratories | CAT # 709-075-149       |
| donkey anti-mouse FITC | donkey         | Immunofluorescence 1:250 | Jackson Laboratories | CAT # 715-095-151       |
| FITC-rabbit IgG        | rabbit         | Immunofluorescence 1:200 | Jackson Laboratories | CAT # 011-090-003       |
